# Supplementary material for: Bridging the gap between physical and mental illness in community pharmacy (PharMIbridge): protocol for an Australian cluster randomised controlled trial
Source: PubMed Central journal article supplement — BMJ Open. 2020 Jul 23;10(7):e039983. doi: 10.1136/bmjopen-2020-039983 (PMC7380878; doi:10.1136/bmjopen-2020-039983), 2020-07-23
Supplement: bmjopen-2020-039983.draft_revisions.pdf [file bmjopen-2020-039983.draft_revisions.pdf]

# BMJ Open

BMJ Open is committed to open peer review. As part of this commitment we make the peer review history of every article we publish publicly available.

When an article is published we post the peer reviewers' comments and the authors' responses online. We also post the versions of the paper that were used during peer review. These are the versions that the peer review comments apply to.

The versions of the paper that follow are the versions that were submitted during the peer review process. They are not the versions of record or the final published versions. They should not be cited or distributed as the published version of this manuscript.

BMJ Open is an open access journal and the full, final, typeset and author-corrected version of record of the manuscript is available on our site with no access controls, subscription charges or pay-per-view fees (<http://bmjopen.bmj.com>).

If you have any questions on BMJ Open's open peer review process please email [info.bmjopen@bmj.com](mailto:info.bmjopen@bmj.com)

# BMJ Open

## **Bridging the gap between physical and mental illness in community pharmacy (PharMIbridge): protocol for an Australian cluster randomised controlled trial**

|                               |                                                                                                                                                                                                                                                                                                                                                                                                                                                                                                                                                                                                          |
|-------------------------------|----------------------------------------------------------------------------------------------------------------------------------------------------------------------------------------------------------------------------------------------------------------------------------------------------------------------------------------------------------------------------------------------------------------------------------------------------------------------------------------------------------------------------------------------------------------------------------------------------------|
| Journal:                      | <i>BMJ Open</i>                                                                                                                                                                                                                                                                                                                                                                                                                                                                                                                                                                                          |
| Manuscript ID                 | bmjopen-2020-039983                                                                                                                                                                                                                                                                                                                                                                                                                                                                                                                                                                                      |
| Article Type:                 | Protocol                                                                                                                                                                                                                                                                                                                                                                                                                                                                                                                                                                                                 |
| Date Submitted by the Author: | 01-May-2020                                                                                                                                                                                                                                                                                                                                                                                                                                                                                                                                                                                              |
| Complete List of Authors:     | Wheeler, Amanda; Griffith Health Institute, Griffith University, Menzies Health Institute; University of Auckland, Faculty of Health and Medical Sciences<br>O'Reilly, Claire L.; Univ Sydney, Sydney Pharmacy School, Faculty of Medicine and Health; The University of Sydney<br>El-Den, Sarira; University of Sydney, Pharmacy<br>Byrnes, Joshua; Griffith University, Centre for Applied Health Economics<br>Ware, Robert; Griffith University, Menzies Health Institute Queensland<br>McMillan, Sara; Menzies Health Institute Queensland, Griffith University, School of Pharmacy and Pharmacology |
| Keywords:                     | MENTAL HEALTH, EDUCATION & TRAINING (see Medical Education & Training), PUBLIC HEALTH                                                                                                                                                                                                                                                                                                                                                                                                                                                                                                                    |
|                               |                                                                                                                                                                                                                                                                                                                                                                                                                                                                                                                                                                                                          |

SCHOLARONE™  
Manuscripts

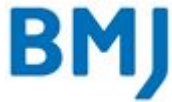

I, the Submitting Author has the right to grant and does grant on behalf of all authors of the Work (as defined in the below author licence), an exclusive licence and/or a non-exclusive licence for contributions from authors who are: i) UK Crown employees; ii) where BMJ has agreed a CC-BY licence shall apply, and/or iii) in accordance with the terms applicable for US Federal Government officers or employees acting as part of their official duties; on a worldwide, perpetual, irrevocable, royalty-free basis to BMJ Publishing Group Ltd ("BMJ") its licensees and where the relevant Journal is co-owned by BMJ to the co-owners of the Journal, to publish the Work in this journal and any other BMJ products and to exploit all rights, as set out in our [licence](#).

The Submitting Author accepts and understands that any supply made under these terms is made by BMJ to the Submitting Author unless you are acting as an employee on behalf of your employer or a postgraduate student of an affiliated institution which is paying any applicable article publishing charge ("APC") for Open Access articles. Where the Submitting Author wishes to make the Work available on an Open Access basis (and intends to pay the relevant APC), the terms of reuse of such Open Access shall be governed by a Creative Commons licence – details of these licences and which [Creative Commons](#) licence will apply to this Work are set out in our licence referred to above.

Other than as permitted in any relevant BMJ Author's Self Archiving Policies, I confirm this Work has not been accepted for publication elsewhere, is not being considered for publication elsewhere and does not duplicate material already published. I confirm all authors consent to publication of this Work and authorise the granting of this licence.

1  
2  
3 **Title: Bridging the gap between physical and mental illness in community pharmacy**  
4  
5 **(PharMIbridge): protocol for an Australian cluster randomised controlled trial**  
6  
7

8  
9 Amanda J Wheeler<sup>1,2</sup>, Claire L O'Reilly<sup>3</sup> (co-primary authors)

10  
11 Sarira El-Den<sup>3</sup>

12  
13 Joshua Byrnes<sup>1</sup>

14  
15 Robert S Ware<sup>1</sup>

16  
17 Sara S McMillan<sup>1,4</sup>

18  
19  
20  
21  
22  
23 <sup>1</sup> Menzies Health Institute Queensland, Griffith University, Brisbane, Queensland, Australia

24  
25 <sup>2</sup> Faculty of Medical and Health Sciences, Auckland University, Auckland, New Zealand

26  
27 <sup>3</sup> Sydney Pharmacy School, Faculty of Medicine and Health, The University of Sydney,  
28  
29 Sydney, NSW, Australia

30  
31  
32 <sup>4</sup> School of Pharmacy and Pharmacology, Griffith University, Gold Coast, Qld, Australia

33  
34  
35  
36  
37 \*Corresponding author

38  
39 Professor Amanda J Wheeler

40  
41 Menzies Health Institute Queensland, Griffith University, Nathan campus, Brisbane 4111,  
42  
43 Australia.

44  
45 +61 7 33821088

46  
47 Email: [a.wheeler@griffith.edu.au](mailto:a.wheeler@griffith.edu.au)

48  
49  
50 **Word count:** 7145 without abstracts, references, tables, figures

51  
52  
53 **Keywords:** mental health, severe and persistent mental health, community pharmacy,  
54  
55 physical health, medication adherence  
56  
57  
58  
59  
60

## ABSTRACT

**Introduction** There is a significant life expectancy gap attributable to physical comorbidities for people living with severe and persistent mental illness (SPMI) compared to the general population. Medications are a major treatment for SPMI management and physical illnesses, hence pharmacists are well-positioned to support mental healthcare and comorbidities. The RCT aim is to evaluate effectiveness of an individualised, pharmacist-led, support service for people experiencing SPMI focusing on medication adherence and physical comorbidity management, compared to standard care (a medication-management service; MedsCheck).

**Methods and analysis** *PharMIbridge* is a cluster RCT, whereby community pharmacies in four Australian regions will be randomised (1:1 ratio), to either Intervention Group (IG) or Comparator Group (CG). All IG and CG pharmacy staff will receive Blended-Mental Health First Aid training. Additionally, IG pharmacists will receive further training on medication adherence, goal setting, motivational interviewing, managing physical health concerns and complex issues relating to psychotropic medication. CG pharmacists will not receive additional training, and will provide standard care (MedsCheck). The primary outcome will be change in participants medication adherence over 6-months. Using mixed-effects logistic regression model and a cluster size of 48 pharmacies, a total of 190 participants will need to be recruited to each arm to find a statistically significant difference in medication adherence. Secondary outcomes will be changes in factors associated with cardiometabolic risk and quality of life, emphasising physical and psychological wellbeing; medication-related problems; pharmacists knowledge, confidence and ability to support people experiencing SPMI; and effects on healthcare utilisation. A within RCT-based economic evaluation comparing the intervention with standard care will be undertaken.

**Ethics and dissemination** The protocol and pharmacist training program received Griffith University Human Research Ethics Committee approval (HREC/2019/473 and

1  
2  
3 HREC/2019/493 respectively). Results will be published in peer-reviewed journals and  
4  
5 available at Sixth Community Pharmacy Agreement website (<http://6cpa.com.au/about-6cpa/>).  
6  
7

8 **Trial Registration Number:** ANZCTR;processing  
9

### 10 **Strengths and limitations of this study**

- 13 • The *PharMIbridge* RCT builds on previous Australian research to test the effectiveness  
14 of a pharmacist-led medication support service for consumers living with SPMI, with  
15 an additional focus on the management of physical comorbidities which are highly  
16 prevalent in this population.  
17
- 18 • A multi-disciplinary approach will encourage participating pharmacies to develop and  
19 maintain working relationships with local GP clinics, medical centres, mental health  
20 care teams, and other physical health/exercise centres and practitioners (e.g. gyms)  
21 beyond the life of the RCT.  
22
- 23 • Routinely collected pharmacy dispensing and Pharmaceutical Benefits Scheme (PBS)  
24 data will be used, alongside self-reported measurements, to evaluate medication  
25 adherence, which is the primary outcome measure.  
26
- 27 • While a key focus of this RCT is exploring the impact of the *PharMIbridge* intervention  
28 on the physical wellbeing and overall health of people living with SPMI, the follow-up  
29 time is insufficient to use these and related outcomes as primary outcome measures.  
30
- 31 • It is not possible for pharmacy staff or consumer participants to be blind to service  
32 allocation, due to the nature of the intervention.  
33  
34  
35  
36  
37  
38  
39  
40  
41  
42  
43  
44  
45  
46  
47  
48  
49  
50

### 51 **BACKGROUND AND RATIONALE**

52  
53  
54 Community pharmacists are highly trusted and essential members of the primary healthcare  
55 team, playing a vital role through medication supply and information provision. Given the  
56  
57 accessibility of community pharmacies, pharmacists are in an ideal position to adopt a triage-  
58  
59  
60

1  
2  
3 style role, signposting to other health care professionals and services. There is an emerging  
4  
5 role, and growing need, for community pharmacists to support and manage mental illnesses.  
6  
7 Research has demonstrated that pharmacists are capable of identifying consumers at risk of  
8  
9 depression and referring appropriately for diagnosis and therapy,<sup>1-3</sup> managing psychotropic  
10  
11 (e.g. antipsychotic and mood stabiliser) medication-related problems (MRPs),<sup>4-7</sup> providing  
12  
13 antidepressant adherence support, and working within multidisciplinary mental health care  
14  
15 teams.<sup>8-10</sup>  
16  
17

18  
19 However, evidence also suggests that health care professionals, including pharmacists,  
20  
21 are not exempt from holding stigmatising attitudes and behaviours towards mental health  
22  
23 consumers;<sup>11 12</sup> pharmacists with more marked stigmatising attitudes were reported to be less  
24  
25 willing to provide professional services to people with severe and persistent mental illness  
26  
27 (SPMI)\*.<sup>14</sup> Lack of training in mental health or the opportunity to acquire the necessary skills  
28  
29 and confidence in working with mental health consumers, have been cited as barriers to  
30  
31 providing appropriate and timely care for this population.<sup>15</sup> Hence, the urgent need to develop  
32  
33 a training program that addresses pharmacists' mental health knowledge gaps in anticipation  
34  
35 of improving attitudes towards, and confidence in, providing care for people living with SPMI.  
36  
37 This is particularly important in the Australian context given that 61.5% of people who  
38  
39 experience psychosis, do so on multiple occasions, with partial or complete remission of  
40  
41 symptoms between episodes.<sup>16</sup> Also of relevance is that a substantial proportion of Australians  
42  
43 using psychotropic medications access health care services in community settings, with 39-  
44  
45 million mental health-related prescriptions dispensed in Australia in 2018-19.<sup>17</sup>  
46  
47  
48  
49

50  
51 Of significant concern is that Australians living with SPMI also experience poor physical  
52  
53 health; they are five times more likely to smoke, six times more likely to die from  
54  
55 cardiovascular disease and four times more likely to die from respiratory disease than the  
56  
57  
58  
59  
60

---

1  
2  
3 general population, leading to a 14-23 year gap in life expectancy.<sup>18</sup> These issues are often  
4 overlooked and/or dismissed by health care professionals and policy makers.<sup>19</sup> For example, a  
5 study by Morant et al.<sup>20</sup> in the United Kingdom found that the physical health concerns of  
6 antipsychotic users were not addressed by prescribing psychiatrists. Decisive action is needed  
7 to engage both relevant health practitioner groups and people living with SPMI with respect to  
8 physical health management.<sup>21</sup>  
9

10  
11  
12  
13  
14  
15  
16  
17 The acceptability of medications by people living with SPMI is also problematic and  
18 adherence is poor.<sup>22</sup> Reasons include, but are not limited to, experiencing (or the risk of  
19 experiencing) unwanted side effects, reluctance to rely on medication, and forgetfulness.<sup>22</sup> Poor  
20 adherence with antipsychotics is a key reason for relapse in psychosis; even missing a few days  
21 of treatment substantially increases this risk.<sup>23</sup> However, a good therapeutic relationship with  
22 attending health practitioners is linked to better medication adherence, fewer hospital  
23 admissions and a reduction in self-harm in people experiencing psychosis.<sup>24</sup> In this respect,  
24 pharmacist-led medication reviews for mental health consumers have shown promising  
25 results,<sup>7 25</sup> and given the associated concerns with drug-drug interactions, are particularly  
26 relevant for those living with SPMI using psychotropic medications.  
27  
28  
29  
30  
31  
32  
33  
34  
35  
36  
37  
38  
39  
40  
41

### 42 **Evidence gap**

43  
44 Overall, there is relatively limited research on improving outcomes for consumers living with  
45 SPMI in the primary care setting (including community pharmacy). Whilst research exploring  
46 the impact of medication reviews on psychotropic prescribing within residential aged care  
47 settings has been conducted,<sup>26</sup> few studies have involved participants using psychotropic  
48 medications living in the community,<sup>27 28</sup> particularly those experiencing SPMI.<sup>29</sup> While  
49  
50  
51  
52  
53  
54  
55  
56  
57  
58  
59  
60



1  
2  
3 Australian pharmacists can provide a medication review service in the form of a MedsCheck<sup>†</sup>  
4  
5 within the community pharmacy setting, research exploring the impact of this service on  
6  
7 medication adherence is limited.<sup>30-33</sup>  
8  
9

10 To our knowledge, research exploring the impact of a community pharmacist-delivered  
11 medication or health-related service specifically for people living with SPMI is scarce A  
12  
13 Canadian study demonstrated that pharmacy staff supported mental health consumers by  
14 providing follow-up care which focused on medication management and improving health  
15 service navigation and most study participants were using multiple psychotropic medications,  
16  
17 few were living with SPMI (n=36; 17.9%).<sup>34 35</sup> Additionally, results from an Australian  
18  
19 community-based, pharmacist-led medication support service for participants living with  
20 depression and anxiety were positive with significant improvements in relation to participants  
21 illness perceptions, medication satisfaction and medication adherence.<sup>6</sup> Our proposed  
22  
23 Randomised Controlled Trial (RCT) builds and expands on this evidence to test the  
24 effectiveness of a person-centred, goal-oriented, and flexible, pharmacist-led support service  
25 for people living with SPMI, with a specific focus on improving medication adherence and  
26 managing physical comorbidities. For the purpose of this RCT, SPMI refers to any mental  
27  
28 illness that has a continuous and significant effect on a person's daily life, and includes (but is  
29 not limited to) the following: schizophrenia and other psychotic disorders, severe and recurrent  
30 depression, and bipolar disorder.  
31  
32  
33  
34  
35  
36  
37  
38  
39  
40  
41  
42  
43  
44  
45

### 46 **Study objectives**

47  
48 The aim of this RCT is to evaluate the effectiveness of “Bridging the Gap between Physical  
49 and Mental Illness in Community Pharmacy (*PharMIbridge*)”; an intervention comprising an  
50  
51  
52  
53  
54  
55  
56  
57  
58  
59  
60

---

<sup>†</sup>A MedsCheck is an Australian remunerated service which involves a community pharmacist reviewing a person's medication, identifying any medication-related problems (MRPs), and providing related medication information. Australian residents eligible for a MedsCheck service include consumers who are at a higher risk of MRPs, such as those using more than five prescription medicines.<sup>30</sup>  
For peer review only - <http://bmjopen.bmj.com/site/about/guidelines.xhtml>

1  
2  
3 individualised, pharmacist-led, support service for people living with SPMI, compared to  
4 standard care involving a one-off medication management service (MedsCheck). The primary  
5 objective is to test the impact of the *PharMIbridge* intervention (Intervention Group; IG) on  
6 medication adherence. It is hypothesised that the *PharMIbridge* intervention will demonstrate  
7 a 20% increase in adherence at six-months compared with standard care (Comparator Group;  
8 CG). Overall, the objectives of the *PharMIbridge* RCT are to assess changes in:  
9

- 10 • medication adherence;
- 11 • health outcomes including quality of life, physical health and psychological wellbeing;
- 12 • community pharmacists' confidence, knowledge and ability to address the medication-  
13 related and physical health care needs of people living with SPMI; and,
- 14 • health care service acceptability, utilisation and cost-effectiveness

15 The findings will be used to inform a more widespread implementation of person-centred  
16 service models for people living with SPMI within the primary healthcare sector.  
17

## 18 **METHODS**

19 Using a cluster RCT design, community pharmacies will be randomised to deliver either:  
20

- 21 i) the *PharMIbridge* intervention; or,
- 22 ii) standard care involving a one-off MedsCheck service.

23 Figure 1 provides an overview of the research design, which involves a partnership  
24 between two University institutions (Griffith University and The University of Sydney) and  
25 two professional pharmacy organisations (The Pharmacy Guild of Australia and The  
26 Pharmaceutical Society of Australia). Genuine engagement throughout the entire RCT with  
27 individuals with lived experiences of SPMI is critical to success. Given that those living with  
28 SPMI require a multifaceted approach to meet their mental and physical health care needs, a  
29 multidisciplinary team is also a key component of the *PharMIbridge* RCT. An Expert Panel  
30

1  
2  
3 will be formed, with invitations extended to consumer representatives living with SPMI, and  
4  
5 representatives from key organisations such as Mental Health Australia, National Mental  
6  
7 Health Consumer and Carer Forum, Sane Australia, the Royal Australian and New Zealand  
8  
9 College of Psychiatrists (RANZCP), and the Royal Australian College of General Practitioners  
10  
11 (RACGP). The Expert Panel will provide the research team with guidance on the  
12  
13 implementation of the RCT, including advice on consumer and healthcare professional  
14  
15 engagement, training materials and other resources, and research translation. The research team  
16  
17 will work with local Primary Health Networks (PHNs)<sup>‡</sup> across RCT sites to recruit eligible  
18  
19 community pharmacies into the *PharMIbridge* RCT.  
20  
21  
22  
23  
24  
25  
26  
27  
28  
29  
30  
31  
32  
33  
34  
35  
36  
37  
38  
39  
40  
41  
42  
43  
44  
45  
46  
47  
48  
49  
50  
51  
52  
53  
54  
55  
56  
57  
58  
59  
60

---

<sup>‡</sup> PHNs are independent organisations funded by the Australian Government. They work closely with local hospital networks and each PHN is overseen by a board of medical professionals. PHNs conduct assessments of the health needs of their region to identify groups of people who need more resources, programs and services. The information helps PHNs to tailor health services to meet the community's needs (<https://www.healthdirect.gov.au/primary-health-networks-phns>). 8

1  
2  
3  
4  
5  
6  
7  
8  
9  
10  
11  
12  
13  
14  
15  
16  
17  
18  
19  
20  
21  
22  
23  
24  
25  
26  
27  
28  
29  
30  
31  
32  
33  
34  
35  
36  
37  
38  
39  
40  
41  
42  
43  
44  
45  
46  
47  
48  
49  
50  
51  
52  
53  
54  
55  
56  
57  
58  
59  
60

*Insert Figure 1 about here*

## Study setting and population

This RCT will be conducted in four Australian regions including urban, rural and remote. Two regions in Western Australia (WA) (i.e. South-West and Metropolitan/South Perth), one region in New South Wales (NSW) (i.e. Hunter New England) and the Australian Capital Territory (ACT) will be included. RCT sites will include a mix of community pharmacies within varied PhARIA (Pharmacy Accessibility/Remoteness Index of Australia classification) locations,<sup>36</sup> while also ensuring pharmacies ability to meet the eligibility criteria and recruit the required number of consumer participants. For example, the South-West region of WA includes a mix of regional and remote areas and has a high need for mental health services, with only 6% of the affected population reported to be receiving appropriate care for their mental health problems.<sup>37</sup>

### Community pharmacies

Community pharmacies located within the selected RCT regions will be eligible if they have:

- i) approval to dispense pharmaceutical benefits as part of the Pharmaceutical Benefits Scheme (PBS);
- ii) accreditation for Quality Care Pharmacy standards (quality assurance program for community pharmacies);
- iii) a clientele demographic that includes people with SPMI;
- iv) routinely provided MedsCheck as an established professional service;
- v) guaranteed that the *PharMIbridge* intervention will be carried out by a registered pharmacist who has completed the training;
- vi) a private room/area for confidential conversations and assessments;
- vii) pharmacy owner/manager consent to participate; and,

- 1  
2  
3       viii) an established working relationship with local GP clinics or centres, mental health  
4               care teams, and/or are already engaged with mental health promotion.  
5  
6

7  
8       Pharmacies will be randomised into the IG or CG after stratification by region and  
9  
10       geographic location (urban/rural/remote). Within each stratum, pharmacies will be randomly  
11  
12       allocated in a ratio of 1:1 to the IG or CG. Randomisation will occur after all pharmacies for  
13  
14       that RCT region have been recruited. The number of full-time equivalent employees will be  
15  
16       ranked within each stratum, and pharmacies will be formed into pairs. A list of computer-  
17  
18       generated random numbers will be used to allocate either the PharMIbridge intervention (IG)  
19  
20       or MedsCheck service (CG) to the first of each pair; the second in each pair will be allocated  
21  
22       the alternative service. It is expected that 12 pharmacies will be located in urban, nine in  
23  
24       regional/rural and three in remote areas in each of the RCT arms.  
25  
26  
27  
28  
29

### 30 31       Consumer participants

32  
33       Trained pharmacy staff (CG and IG) will identify ten eligible consumers per pharmacy for an  
34  
35       enrolment period of six months. Consumers can also self-identify into the RCT via research  
36  
37       promotion or be referred directly from a treating health care professional, non-government  
38  
39       organisation or mental health service. Eligible consumers need to have capacity to provide  
40  
41       informed consent, as assessed by trained pharmacy staff using capacity assessment principles  
42  
43       for RCT participation, and consent to pharmacists contacting their treating healthcare team  
44  
45       (e.g. GP, case manager, psychiatrist).<sup>38</sup> Furthermore, eligible consumers need to provide  
46  
47       consent to allow the researchers to access their associated Medicare Benefits Schedule (MBS),  
48  
49       PBS, hospitalisation and emergency department records for a 12-month pre- and 6-month post-  
50  
51       trial period. Specifically, eligibility will require participants to:  
52  
53

- 54       i)       be 16 years and over and residing in the community;  
55  
56  
57  
58  
59  
60

- 1  
2  
3 ii) be using at least one antipsychotic or mood stabiliser for at least six-months  
4 continuously, for the treatment of SPMI; and,  
5  
6  
7  
8 iii) have a complex medication need (e.g. adherence concerns) or unmanaged physical  
9 health problems.  
10  
11

12 Although participants need 6-months of dispensing data for a psychotropic medicine  
13 prior to RCT enrolment, medication changes during this time are reasonable, as well as the use  
14 of other medication(s) for their mental and physical health. Exclusion criteria include:  
15  
16  
17

- 18  
19 i) aged under 16 years;  
20  
21 ii) unstable mental health symptoms or deemed as an unsuitable RCT participant by  
22 their treating health care professionals, pharmacist or carer;  
23  
24 iii) 'when required' or inconsistent use of antipsychotic and/or mood stabiliser  
25 medication(s);  
26  
27 iv) using an antipsychotic or mood stabiliser medication for treatment of an illness not  
28 related to SPMI (e.g. off-label use of quetiapine for sleep or anxiety);  
29  
30 v) not consenting to participate to the researchers contacting their treating healthcare  
31 practitioner, or to accessing PBS, MBS and hospitalisation data; and,  
32  
33 vi) receiving a MedsCheck or Home Medicines Review (HMR)<sup>§</sup> within 12-months  
34 prior to RCT enrolment.  
35  
36  
37  
38  
39  
40  
41  
42  
43  
44  
45  
46  
47  
48  
49  
50  
51  
52  
53  
54  
55  
56  
57  
58  
59  
60

### ***PharMIbridge* intervention**

An overview of the proposed *PharMIbridge* RCT is illustrated in Figure 2. The intervention will be undertaken by trained community pharmacists randomised into the IG. In addition to the standard care available in all community pharmacies, the intervention will provide IG consumer participants with an in-depth service that is goal-oriented, flexible and individualised. Goals will be guided by an in-depth medication review, various self-assessment questionnaires and tools (documented during the Initial Health Review consultation) and be tailored to meet individual needs. There will be a specific focus on overcoming barriers to medication adherence and addressing physical health concerns (Table 1). RCT questionnaires and tools are reported under *Study outcomes*.

*Insert Figure 2 about here*

IG consumer participants will receive individualised care and support over a six month period (Figure 2) to promote medication adherence, optimise the management of their mental illness, and encourage lifestyle and pharmacological strategies to improve physical health, with a particular focus on reducing cardiometabolic risk. During the initial consultation (Figure 2), IG pharmacists will utilise motivational interviewing techniques to determine participants' key concerns regarding their medication, adherence, and physical and psychological wellbeing. Upon identification of three to five key issues, IG pharmacists will: i) engage participants in a goal-setting discussion and explore strategies to achieve these goals; ii) complete a signed agreement of the support plan; and iii) confirm participant's consent to discuss this plan with their nominated healthcare professional (e.g. GP, psychiatrist, case manager, etc.). The pharmacist will continue to work with the participant over the 6-month intervention period towards goal achievement, with follow-ups as identified with the participant and in their preferred modality (face-to-face, email, telephone, text messaging). At a minimum, it is expected that participants will have at least three face-to-face consultations with IG pharmacists (including the Initial and Final Health Review consultations). However, additional

1  
2  
3 consultations can occur during the RCT period and participants can obtain pharmacist advice at any  
4  
5 time, as needed. At the final 6-month follow-up the IG pharmacist and participant will complete the  
6  
7 Final Health Review.  
8  
9

10 IG pharmacists will be required to keep accurate records of interactions and outcomes using a  
11  
12 cloud-based software platform (GuildCare NG™), which is currently used in many community  
13  
14 pharmacies when delivering professional services. Support plans, medication-related reports and  
15  
16 follow-up consultations, recorded as part of the *PharMIbridge* intervention, will be accessible to a  
17  
18 participant's nominated health care professional for their direct input, through GuildCare NG™. IG  
19  
20 pharmacists will work collaboratively with participants' nominated healthcare practitioner(s),  
21  
22 updating them regularly via the Guildcare platform and usual communication mechanisms  
23  
24 especially when there are any concerns needing rapid intervention.  
25  
26  
27  
28  
29  
30  
31  
32  
33  
34

### 35 **Comparator arm**

36  
37 Participants recruited by a CG pharmacy will receive a standard MedsCheck service after enrolment  
38  
39 and then continue to receive the usual care that the community pharmacy provides. All requirements  
40  
41 outlined for the MedsCheck service will be followed, noting that some participants may not have  
42  
43 otherwise been eligible for this government funded service (e.g. not taking five or more medicines).  
44  
45 Pharmacists will schedule a follow-up consultation to complete final RCT outcome assessments  
46  
47 with participants six-months following recruitment into the RCT.  
48  
49  
50  
51  
52

### 53 **Training**

54  
55 Previous evidence-based programs will inform the development of the education and training  
56  
57 materials for the RCT. This includes the training modules used in the Australian mental health  
58  
59  
60



1  
2  
3 feasibility study,<sup>39</sup> as well as research into pharmacists' knowledge and mental health literacy,<sup>40</sup>  
4 mental health stigma,<sup>14 41</sup> Mental Health First Aid<sup>#</sup> (MHFA),<sup>42</sup> simulated patient assessments,<sup>43 44</sup>  
5  
6 consumer-led education,<sup>45</sup> consumer perspectives and consumer/carer trainers.<sup>46-48</sup> A training  
7  
8 working group will oversee and develop the training content required to deliver the intervention.  
9  
10 This group will comprise representation from content experts, consumer representatives and the  
11  
12 partner organisations. Face and content validity of all newly developed training material will be  
13  
14 ensured through collaborations with mental health consumers, the multidisciplinary Expert Panel  
15  
16 and professional pharmacy and mental health organisations. Training will be delivered in such a  
17  
18 way that it facilitates a naturalistic approach to enable pharmacists to use their discretion to  
19  
20 individually tailor the *PharMIbridge* intervention for each participant.  
21  
22  
23  
24  
25

26 Training will involve a one or two-day program depending on RCT arm allocation, with IG  
27  
28 pharmacists attending both training days:  
29

- 30 • First training day

31  
32 Pharmacy staff in both IG and CG arms will complete Blended MHFA for Pharmacy (B-MHFAP)<sup>≠</sup>  
33  
34 training, involving a six-hour online module completed prior to attending the half-day face-to-face  
35  
36 training component.<sup>49</sup> It will be delivered by an accredited instructor and is certified for 24  
37  
38 Continuing Professional Development points. Training on research processes, including participant  
39  
40 recruitment and consent, service delivery, and use of GuildCare NG<sup>TM</sup> as a platform for all data  
41  
42 collection, will be delivered to both IG and CG pharmacy staff in separate groups to ensure they are  
43  
44 'research-ready.' Established guidelines for providing MedsCheck services will be utilised by CG  
45  
46 pharmacists.<sup>51</sup> A standard operating procedure (SOP) will be provided to all pharmacists outlining  
47  
48 the various steps in the research process.  
49  
50  
51  
52  
53  
54  
55  
56  
57  
58  
59

---

60 <sup>≠</sup> The blended MHFA in the Pharmacy (B-MHFAP) course uses case-studies, videos and resources tailored to pharmacy staff learning needs and is completed in a blended format, combining eLearning and a follow-up 4-hour face-to-face session.  
<https://mhfa.com.au/courses/public/types/blendedpharmacy>

1  
2  
3 The remainder of the first day of training for IG pharmacy staff will involve the use of  
4 simulated patient role-plays with the accredited B-MHFAP instructors and mental health consumers  
5 to encourage staff to practice their newly acquired MHFA skills.<sup>43 44 50</sup> Simulated patient role-plays  
6 with on-the-spot performance feedback will allow pharmacy staff to demonstrate their newly  
7 acquired skills in a safe, authentic and supportive learning environment. Research has highlighted  
8 the importance of behavioural assessments post-training due to the potential for over, and/or under,  
9 estimating skills through self-reported measures.<sup>43</sup> Research has also indicated that both participants  
10 and observers of simulated B-MHFAP role-plays report higher self-reported confidence than those  
11 who receive MHFA only, and that maintain improvements in confidence post-training.<sup>44</sup>

- Second training day

12 IG pharmacists will be required to complete four interactive training modules on key issues  
13 associated with psychotropic medication use and physical health, and how to address these issues  
14 for people living with SPMI, using evidence-based tools. The modules will be developed by the  
15 training working group and led by experts (including psychiatrists, psychopharmacologists, and  
16 consumer consultants) and will include the following topics:

1. *Complex issues relating to psychotropic medication (adherence and side effects)*. This module will discuss the role of psychotropic medications, including an exploration of the barriers and enablers to adherence, and the consequences of poor adherence. It will also discuss complex issues relating to psychotropic medication use, such as weight gain and diabetes.
2. *Physical health issues for people living with SPMI*. This module will explore the evidence regarding the importance of physical health care and exercise for people living with SPMI. It will also include information on active lifestyles, cardiometabolic risk, tobacco use and resources.
3. *Evidence-based strategies to improve medication adherence and physical health care*. This module will equip pharmacists with evidence-based strategies including guidance on

1  
2  
3 addressing cardiovascular risk factors, and sensitive issues such as weight management,  
4  
5 smoking cessation, dental health, and medication adherence.  
6  
7

- 8 4. *Communication, motivational interviewing and goal setting.* This module will help pharmacists  
9  
10 develop appropriate and person-centred communication skills and strategies to work with  
11  
12 participants to set, and reach, their mental and physical health goals.  
13

14  
15 Case studies and role-play activities will be integrated throughout the modules to provide IG  
16  
17 pharmacists with opportunities to practice and apply their newly acquired skills, including the use  
18  
19 of research tools and questionnaires. Prior to the first workshop commencing specific aspects of the  
20  
21 training will be video-recorded to consistency in delivering the intervention to all workshops. The  
22  
23 training modules will be made available online for IG pharmacists to access as needed for reference  
24  
25 purposes.  
26  
27

28  
29 The continued wellbeing of participants living with SPMI is a key aspect of the training.  
30  
31 Information on mental health and crisis support numbers and websites will be part of the resources  
32  
33 provided, e.g. Lifeline, BeyondBlue. Furthermore, communication between pharmacists and the  
34  
35 participant's treating team will be ongoing throughout the RCT, thus helping to ensure that any  
36  
37 deterioration in health status, or concerns about wellbeing, will be immediately recognised and  
38  
39 addressed.  
40  
41  
42  
43  
44

45 Recruited community pharmacies will be required to send at least two pharmacists (one of  
46  
47 whom can be an intern pharmacist<sup>Ø</sup> working under the supervision of a registered pharmacist) to  
48  
49 complete the *PharMIbridge* training components. All pharmacies will be encouraged to invite  
50  
51 additional pharmacy support staff to complete and attend the B-MHFAP component and  
52  
53 information session on research processes, to support pharmacists in delivering the intervention/  
54  
55 comparator and establish 'Mental Health Friendly Pharmacies'. Ultimately, trained registered  
56  
57  
58  
59  
60

1  
2  
3 pharmacists will take responsibility for delivering the *PharMIbridge* intervention. For example,  
4 while only the pharmacist can be involved in addressing MRPs, a pharmacy support staff member  
5 with well-established consumer relationships could assist with promotion, be involved with  
6 identifying eligible participants, making follow-up appointments, or sending reminders.  
7  
8  
9  
10  
11

12 A pilot workshop of the non-B-MHFAP training components will involve a convenience  
13 sample of pharmacy students, intern and registered pharmacists, and all RCT trainers/mentors.  
14 Feedback will be sought through pre- and post-training questionnaires and focus group discussions  
15 at the conclusion of pilot training. This feedback will help identify whether modifications to the  
16 training are required prior to its delivery as part of the RCT.  
17  
18  
19  
20  
21  
22  
23  
24  
25

### 26 Training mentors

27 The IG training components will be delivered by a local pharmacist and consumer mentor  
28 partnership in each RCT region who will also provide ongoing support for IG pharmacy staff  
29 throughout the RCT. The combination of a pharmacist educator with experience in community  
30 pharmacy practice and a consumer educator with lived experience of mental illness working as a  
31 mentor pair has been shown to facilitate implementation of a mental health support service for  
32 consumers with depression and anxiety.<sup>46</sup> The mentor pair will personally visit the IG pharmacies  
33 in their RCT region on a minimum of two occasions during the intervention period. In addition to  
34 these visits, mentors will provide regular support through phone calls, emails and other modalities,  
35 as required. Moreover, the training team will provide two refresher webinars in each RCT region;  
36 these will be led by the two mentors. Webinars will focus on problem-solving discussions and co-  
37 learning perhaps using examples of ‘what has worked well’/‘not so well’ to stimulate conversation.  
38 Refresher content will be based on two additional, pre-recorded, case-scenarios allowing  
39 pharmacists to revise the skills they have been applying in practice.  
40  
41  
42  
43  
44  
45  
46  
47  
48  
49  
50  
51  
52  
53  
54  
55  
56  
57  
58  
59  
60

## Study outcomes

### Primary outcome

The primary outcome is the difference in medication adherence rates between the IG and CG at RCT conclusion (six-months). Medication adherence will be identified using both routinely collected data (pharmacy dispensing and PBS) and self-reported measurements of adherence; the Reported Adherence to Medicine (RAM)<sup>52</sup> scale which has been validated for use among people with psychosis, schizoaffective disorder and schizophrenia.<sup>53</sup> PBS and pharmacy dispensing data will be used to confirm self-reported data by calculating: i) the Medicine Possession Ratio (MPR), which refers to the proportion of days that a consumer is in possession of their medicine within a defined period; and ii) Medicine Persistence, which refers to a specified time-period when there has been a delay in medicine re-fill.<sup>54</sup> A pilot of the selected tools will be undertaken in the set-up stage of the *PharMIbridge* RCT (Figure 1 and Table 1) to ensure that they are practical, valid and feasible to use within the RCT time-frame.

### Secondary outcomes

#### *Health outcomes*

Clinical measures including weight, body mass index, abdominal girth and blood pressure,<sup>55</sup> will be collected at two time-points; when participants complete the baseline and 6-month follow-up questionnaires. Pharmacists will collect these measures in the pharmacy and/or from patient/health care records. Additionally, participants will be asked (at baseline and 6-month follow-up) if, in the last 12 months, they have had a risk assessment for cardiovascular disease and a glycated haemoglobin (HbA1c) blood test to assess for diabetes. Participants physical health will be evaluated using self-reported questionnaires, including the Physical Activity "Vital Sign" (PAVS) Questionnaire<sup>56</sup> and selected questions from the Australian Health Survey on Dietary Behaviour.<sup>57</sup>

1  
2  
3 The Alcohol, Smoking and Substance Involvement Screening Test (ASSIST) will also be used to  
4  
5 screen for substance use.<sup>58 59</sup>  
6

7  
8 Additional tools such as the My Medicines and Me Questionnaire (M3Q)<sup>60</sup> exploring  
9  
10 psychotropic medication side-effects; the Simple Physical Activity Questionnaire (SIMPAQ)<sup>61 62</sup>  
11  
12 which identifies time spent on physical activity; the Pittsburgh Sleep Quality Index (PSQI)<sup>63</sup>  
13  
14 exploring sleep quality, the Fagerström Test for Nicotine Dependence<sup>64</sup> and the Brief Pain Inventory  
15  
16 (BPI)<sup>66</sup> identifying pain-related concerns, will assist IG pharmacists with intervention delivery.<sup>65 66</sup>  
17  
18 This combined information will inform the development of goals for IG consumer participants, with  
19  
20 goal achievement reviewed at each follow-up, and at the final six-month, consultation using the  
21  
22 Goal Attainment Scale (GAS).<sup>67</sup>  
23  
24

#### 25 26 *Quality of life, medication experiences and illness beliefs* 27

28  
29 Difference in self-reported quality of life (e.g. Assessment of Quality of Life, AQoL-6D),<sup>68</sup>  
30  
31 psychological wellbeing (Kessler Psychological Distress Scale, K-6), sleep problems (Insomnia  
32  
33 Severity Index, ISI),<sup>69</sup> medication burden (Multimorbidity Treatment Burden Questionnaire,  
34  
35 MTBQ),<sup>70</sup> attitudes (Drug Attitude Inventory 10, DAI-10),<sup>71 72</sup> illness beliefs (Brief Illness  
36  
37 Perception Questionnaire, BIPQ),<sup>73</sup> and health care service utilisation (e.g. frequency of GP follow-  
38  
39 up or referrals, pharmacist action/s, hospitalisation(s) and emergency department admissions) will  
40  
41 be measured between and within RCT arms at baseline and at 6-months. An evaluation of the  
42  
43 identification and number and type of MRPs (including side-effects), and adherence to other  
44  
45 prescribed medication, will be undertaken at baseline and six-month follow-up.  
46  
47

48  
49 It is anticipated that the *PharMIbridge* intervention will further optimise health care utilisation  
50  
51 by increasing pharmacist communication and collaboration with other health practitioners and other  
52  
53 support people involved in the participant's care. The RCT will involve increased use of  
54  
55 MedsChecks by community pharmacists for this vulnerable population. Difference in Federal  
56  
57 Government healthcare resource use (measured as the total of primary health care services,  
58  
59  
60

laboratory tests and medications; and MBS data) will be sought from the Australian Government Department of Human Services, with participant consent.

#### *Pharmacy staff evaluation of training*

Evaluation of the B-MHFAP training will be undertaken as a standard component of this accredited course.<sup>74</sup> An evaluation of the *PharMIbridge* training programme in terms of its effectiveness (in comparison to B-MHFA alone) to reduce stigma and build the required skills for pharmacists to work with people living with SPMI will involve pre- and post-training questionnaires, which will be repeated at RCT conclusion. The questionnaires will collect both qualitative and quantitative data including items adapted from validated scales such as the Social Distance Scale,<sup>75</sup> the Mental Illness Attitude Questionnaire,<sup>76</sup> and the Metabolic-Barriers, Attitudes, Confidence, and Knowledge Questionnaire (M-BACK).<sup>77</sup> Additional questions will specifically focus on pharmacist confidence in providing MHFA,<sup>44</sup> willingness to provide services for mental health consumers<sup>14 78 79</sup> and barriers and incentives to working with people living with SPMI.<sup>6</sup>

#### *PharMIbridge service evaluation*

A proportion of IG consumer participants and pharmacists will be invited to participate in a telephone interview at RCT conclusion to qualitatively explore the acceptability and impact of the *PharMIbridge* intervention. Up to five consumer participants from each RCT region will be invited for interviews (max=20) as well as one pharmacist from each pharmacy who participated in the RCT (max=24). The participant interview guide will explore topics including: i) medication adherence and current medications; ii) types of MRPs experienced and resolved; iii) health literacy in relation to psychotropic medicines; iv) changes in relationship between participants, pharmacists and other health care professionals; and, iv) satisfaction with the *PharMIbridge* intervention. An additional participant-reported experience measure will be developed and included at the end of the service delivery in the Final Health Review. A short online survey will also be developed to explore

1  
2  
3 service acceptability for other health practitioners who interact with the intervention, and other  
4  
5 pharmacy staff, e.g. pharmacy assistants.  
6  
7  
8  
9

## 10 **Data collection**

11  
12 The RCT data collection tools and processes will be piloted prior to use (Figure 1). Data will be  
13  
14 collected from consumer participants, pharmacy staff and other health care professionals (Table 1).  
15  
16

17 Consumer participants will be required to consent to their MBS, PBS, hospitalisation and  
18  
19 emergency department data being accessed by researchers for a period of 12-months prior to, and  
20  
21 six-months after, enrolment in the RCT. The reason for collecting data about resource use up to 12-  
22  
23 months prior to the RCT is to test for baseline differences which can then be adjusted for during  
24  
25 analysis.  
26  
27

28 Participant data collected by pharmacists will be entered directly into purpose-built IG and  
29  
30 CG research modules within GuildCare NG™. This cloud-based pharmacy software platform is  
31  
32 used by the majority of community pharmacies in Australia for the delivery of professional service  
33  
34 programs such as MedsCheck; it also links to dispensing systems. In the IG, nominated members  
35  
36 of the participant's treating team (i.e. GP, psychiatrist, mental health case manager) will be provided  
37  
38 with access to their individual consumer participant's research records to facilitate timely access to,  
39  
40 and exchange of, shared information.  
41  
42  
43

44 Participating community pharmacies will receive funding to support their research  
45  
46 involvement, including an administration fee for training attendance, research administration and  
47  
48 data management (ranging from \$3,700-\$10,712 depending on urban/rural/remote location), as well  
49  
50 as a per-participant fee for initial and follow-up consultations, and for six-month data collection. IG  
51  
52 pharmacies will be remunerated for the baseline data collection and Initial Health Review (75  
53  
54 minutes; \$167), follow-up consultations (Level 1: up to three consultations; \$66, or Level 2: greater  
55  
56 than three consultations; \$133), and for the Final Health Review and follow-up data collection (30  
57  
58  
59  
60



1  
2  
3 minutes; \$167). Service fees for CG pharmacists include the MedsCheck consultation and baseline  
4 data collection (60 minutes; \$133) and the six-month follow-up data collection (30 mins; \$66). A  
5 gift voucher valued at AUD\$30 will be offered to all consumer participants at the final, six-month  
6 data collection point in recognition of their time for completing data collection processes that would  
7 not normally be part of their health care.  
8  
9  
10  
11  
12  
13  
14  
15  
16

### 17 **Sample size**

18  
19 Based on a recent study conducted in a similar population,<sup>6</sup> we assume the baseline rate of non-  
20 adherence assessed using pharmacy dispensing data will be 56%. This outcome will be available  
21 for all participants (unless actively withdrawn), regardless of treatment adherence. We assume the  
22 percentage of non-adherent participants in the CG arm will drop to 51% (based on the results of  
23 previous studies exploring adherence as an outcome of a MedsCheck service),<sup>30-33</sup> and the  
24 percentage of non-adherent participants in the IG arm will drop to 35%.<sup>6</sup> With  $\alpha=0.05$ , the RCT  
25 will have 80% power to find a statistically significant difference between RCT arms with 149  
26 individuals recruited to each arm (without accounting for clustering).  
27  
28  
29  
30  
31  
32  
33  
34  
35  
36

37  
38 As this is a cluster-RCT we need to account for the non-independence of observations from  
39 individual participants recruited from the same pharmacy. We assume a median number of 10  
40 participants at each pharmacy, and conservatively assume the  $ICC=0.03$ , giving a design effect of  
41 1.27. Consequently, a total of 190 participants will need to be recruited in each arm (380 in total).  
42 To achieve this, 10 consumer participants will need to be enrolled from each of 38 pharmacies.  
43 Assuming that 20% of pharmacies will withdraw from the RCT without enrolling any participants,  
44 a total of 48 pharmacies will need to be recruited.  
45  
46  
47  
48  
49  
50  
51  
52  
53  
54  
55  
56  
57  
58  
59  
60

## Data analyses

Descriptive statistics will be used; mean (standard deviation) or median (25th-75th percentile) for continuous data and frequency (percentage) for categorical data. We will compare the primary outcome of percentage adherence between RCT arms using a mixed-effects logistic regression model, with treatment arm entered as the fixed effect and pharmacy entered as a random effect, to account for possible non-independence of observations from participants who attend the same pharmacy. Results will be reported as odds ratios and 95% Wald-based confidence intervals.

For secondary analyses, interval data will be analysed using mixed-effects linear regression, binary data using mixed-effects logistic regression, and count data using mixed-effects Poisson regression models. In all cases, the likely non-independence of data from individuals enrolled through the same pharmacy will be accounted for as random effects in the regression models. Analyses will be based on the intention-to-treat principle, with participants analysed according to the treatment they were allocated to receive. Data will be analysed using Stata statistical software (StataCorp, College Station, TX, USA), with significance set at less than 0.05.

Qualitative interviews will be audio-recorded (with participant consent), transcribed verbatim and quality checked. Thematic analysis will be conducted by experienced qualitative researchers within the research team. This process involves reading and re-reading transcripts to identify, analyse and report patterns within the data, leading to the identification of similar codes across the entire data set.<sup>80</sup> Initial codes are thereby sorted into themes and subthemes.<sup>80</sup>

## Economic evaluation

We hypothesise that the provision of the *PharMIbridge* intervention will be cost-effective compared to standard care from a health care sector perspective with regard to RCT-based costs and outcomes (cost per additional participant adherent/cost per [proxy] health outcome). The base case analysis

1  
2  
3 will comprise the cost per additional 'adherent' participant for the IG compared with the CG and  
4 reported as the incremental cost-effectiveness ratio (ICER). The outcome for the base case analysis  
5 is the difference in the change in the proportion of 'adherent' participants from baseline to RCT  
6 conclusion, between the IG and CG. Sub-group analyses will be conducted for the primary outcome  
7 measure (adherence) based on participant characteristics. Regression analyses using 'adherence' as  
8 the dependent variable will be performed to assess if the effect of the intervention varies by SPMI  
9 diagnosis, age, gender, pharmacy location and number of other medications taken concurrently.  
10 Any evidence of non-linearity will be adjusted for using appropriate transformations.  
11  
12  
13  
14  
15  
16  
17  
18  
19  
20  
21

22 A cost per Quality Adjusted Life Year (QALY) gain will also be conducted based on health-  
23 related Quality of Life data collected within the trial. QALYs will be estimated by applying  
24 Australian utility weights and using the area under the curve approach. Difference in QALYs  
25 between the IG and CG will be estimated using linear or non-linear regression methods depending  
26 on the nature of the data. The analytical time-frame for the cost effectiveness analyses will be  
27 limited to that of the follow-up period of the trial. This is the most conservative approach relative  
28 to translation of the primary outcome measure, adherence, where there is likely to be heterogeneity  
29 of medications and conditions.  
30  
31  
32  
33  
34  
35  
36  
37  
38  
39

40 Costs will be considered from the health system perspective and include both the cost of  
41 interventions and the cost consequences from potential changes in health care utilisation. The  
42 difference in health resource use for all participants will be collected and analysed based on  
43 administratively collected MBS, PBS and pharmacy dispensing data.  
44  
45  
46  
47  
48  
49  
50

### 51 Included costs

52 The difference in health resource use for all participants will be collected and analysed from their  
53 MBS and PBS records six-months prior to, and during, enrolment in the RCT. Impact of seasonality  
54 will also be assessed for the same 12-month period. The economic evaluation will quantify costs  
55  
56  
57  
58  
59  
60

1  
2  
3 associated with the *PharMIbridge* intervention at a participant level in the eligible population. The  
4 costs measured in the economic evaluation should be equivalent to their ‘opportunity cost’, i.e.  
5 assessed in terms of the monetary value of the benefits that are foregone because the resources are  
6 not available for their best alternative use. The opportunity cost will be estimated from the market  
7 costs of the resources consumed, whenever available. Costs from the RCT include, but will not be  
8 limited to: i) the training of pharmacists to provide the *PharMIbridge* intervention; ii) the fee-for-  
9 service to pharmacists; and, iii) the clinical software adaption to facilitate the identification of ‘non-  
10 adherent’ participants and record interventions.  
11  
12  
13  
14  
15  
16  
17  
18  
19  
20  
21  
22  
23

#### 24 Cost data analysis

25  
26 The source of any variation (if observed) in costs between intervention and comparator arms, as  
27 well as the cost ‘drivers’, will be investigated with a Generalised Linear Model (GLM) using a  
28 standard statistical software package (STATA). As cost data are not likely to be normally  
29 distributed, a gamma log-link function or similar will be used, with appropriate testing of the GLM  
30 specification using the modified Park test and link test. Full costing will be provided for the RCT.  
31 If certain costs are not included in the economic evaluation, any assumptions, and the effect of their  
32 exclusion, will be specified in the analysis.  
33  
34  
35  
36  
37  
38  
39  
40  
41

42 Costing of the *PharMIbridge* intervention will be undertaken as follows: i) identify  
43 administrative resources used in program management, with RCT-specific administrative resources  
44 separated from activities that would be included in a national roll-out of the program; ii) some  
45 resource use will be measured in natural units (for example, clinical staff time spent on delivering  
46 the *PharMIbridge* intervention) and will be valued in monetary units; iii) other resources can be  
47 directly valued (for example, incentive payments to staff and services); and, iv) if the *PharMIbridge*  
48 intervention delivery requires additional equipment (e.g. privacy screen), market costs will be  
49 estimated with amortisation applied over the useful life of the equipment.  
50  
51  
52  
53  
54  
55  
56  
57  
58  
59  
60

## Sensitivity analysis

The uncertainty in effect sizes and costs will translate into a degree of uncertainty around the estimated ICER. This uncertainty will be explored using a system of seemingly unrelated regression equations. This has been chosen because it has been argued that such methods are generally robust to skewed data, and to allow for any correlation between costs and effects. The cost and adherence (or QALY) regressions will be run simultaneously, including SPMI diagnosis, age, gender, pharmacy location and number of other medications taken concurrently included (as covariates) to explore potential sub-group differences with respect to adherence, costs or cost-effectiveness. Additionally, in order to estimate the level of uncertainty associated with the decision as to whether or not the intervention was cost-effective, we will use the non-parametric bootstrap technique (with 5,000 replications sampled with replacement) to estimate the probability that the intervention is cost-effective over a range of willingness to pay per outcome (adherer / QALY) according to the cost-effectiveness acceptability curve.

## Financial appraisal

Financial appraisal and full pathway costing will be undertaken as part of the *PharMIbridge* RCT. Where assumptions for identification, measurement and valuation of economic costs differ to financial costs, these differences will be specified. The cost to the health sector if the *PharMIbridge* intervention was implemented nationally will be extrapolated over a five-year time frame.

## Patient and public involvement

To provide maximum benefit to people with SPMI, health services need to be relevant, accessible and responsive to their needs. The views of people with lived experience of a mental illness will be paramount to the success of the *PharMIbridge* RCT, from their involvement in the development of

1  
2  
3 the RCT protocol as members of the research team, development and implementation of the  
4 intervention with pharmacy staff as trainers and mentors, and as representatives on the Expert Panel  
5 who will have oversight across the lifetime of the research. A working group of partner organisation  
6 representatives, consumer representatives, and experts actively involved in improving mental health  
7 care will co-develop training material. People with lived experience of SMPI will also inform  
8 dissemination strategies based on the RCT findings.  
9  
10  
11  
12  
13  
14  
15  
16  
17  
18

## 19 **DISCUSSION**

20  
21 The *PharMIbridge* RCT will use the medication expertise of community pharmacists to support  
22 medication adherence and address the physical and mental health needs of participants using  
23 psychotropic medication for SPMI. The focus on the physical health of people living with SPMI is  
24 of utmost importance given the considerable life expectancy gap attributable to physical  
25 comorbidities in this population. Beyond improved consumer participant wellbeing, the  
26 *PharMIbridge* RCT is expected to facilitate better relationships between pharmacists and local  
27 health services, including community mental health teams, PHNs and GPs. Lastly, by providing a  
28 diverse range of mental health services and resources and by increasing community outreach to  
29 mental health and non-mental health related services IG pharmacies will become more prominent  
30 in the mental health sector  
31  
32  
33  
34  
35  
36  
37  
38  
39  
40  
41  
42  
43

44 Although the provision of a MedsCheck service for people using high-risk medication such as  
45 psychotropics (in addition to other criteria), is a currently funded service, there is evidence that  
46 pharmacists' mental health literacy concerning SPMI is lower in comparison to other mental  
47 illnesses.<sup>40</sup> Most people using antipsychotics and/or mood stabilisers would be eligible for a  
48 MedsCheck, however, we believe that this vulnerable population may be missing out on this service  
49 as it is not specifically targeted towards mental health consumers. Therefore, the proposed  
50 *PharMIbridge* intervention is a novel service within the community pharmacy setting and is, to our  
51  
52  
53  
54  
55  
56  
57  
58  
59  
60

1  
2  
3 knowledge, the first RCT to determine the impact of a pharmacist-led support service for people  
4  
5 living with SPMI.  
6

7  
8 All pharmacy staff involved in the RCT will receive B-MHFA. Hence, the *PharMIbridge* RCT  
9  
10 provides an opportunity for all consumer participants to access a recognised standard level of care.  
11  
12 Furthermore, analyses conducted on the CG consumer participant outcomes will allow us to identify  
13  
14 the impact of MedsCheck for consumers living with SPMI. This is particularly important given the  
15  
16 current lack of data regarding the impact of MedsChecks on medication adherence. Furthermore, it  
17  
18 is unrealistic and unethical to expect that consumer participants living with SPMI and enrolled into  
19  
20 the CG receive no form of care or service. These participants will be asked to complete a range of  
21  
22 surveys at baseline which are likely to identify adherence and health issues, and consequently  
23  
24 pharmacists would be expected, as health care professionals, to intervene in such situations. Thus,  
25  
26 the research team also anticipates positive outcomes for CG participants, although this effect is  
27  
28 hypothesised to be inferior to IG participants.  
29  
30  
31  
32

33  
34 There are some limitations to this RCT. While a key focus of this research is the physical health  
35  
36 care needs of consumer participants, the follow-up time of six-months is insufficient to use physical  
37  
38 health as a primary outcome measure. The RCT duration was selected to meet the specified time-  
39  
40 frame requirements of the funding body. Hence, the long-term impact of the *PharMIbridge*  
41  
42 intervention cannot be determined. It should be noted that the RCT sites, while specifically chosen  
43  
44 to reflect a variety of geographical regions, types of pharmacies, mental health services and socio-  
45  
46 economic factors, may not be generalisable to the Australian population. Lastly, as adherence is  
47  
48 known to be an inherently difficult concept to measure, to ensure accurate and comprehensive  
49  
50 assessment the research team will use multiple objective and subjective measures to assess this  
51  
52 outcome. Notwithstanding these limitations, the *PharMIbridge* RCT will provide valuable insights  
53  
54 into the future implementation of a community pharmacy-based, mental health support service  
55  
56 across Australia.  
57  
58  
59  
60

## Ethics and dissemination

This RCT protocol and training program has been approved by Griffith University Human Research Ethics Committee (2019/473 and 2019/493). The trial has been registered with the Australia and New Zealand Clinical Trials Registry (ANZCTR #). At the conclusion of the *PharMIbridge* RCT, a report will be submitted to the Australian Government Department of Health and partner organisations. A dissemination plan will be developed by the research team, project partners and the Expert Panel. A summary of findings for all participating pharmacies and consumer participants will be provided at the end of the RCT. Results will be published as manuscripts in peer-reviewed journals and presented at national and international scholarly conferences and symposia.

**Acknowledgements** This RCT was developed in partnership with The Pharmacy Guild of Australia, the Pharmaceutical Society of Australia, Griffith University and The University of Sydney. We thank Dr Helen Stapleton for her feedback on the manuscript.

**Contributors** AW, COR, SM and SE designed the research protocol and were named investigators on the funding proposal. AW and COR are co-principal investigators and led the intervention and training development and evaluation plan. JB provided expert oversight of the economic evaluation plan, assisted with the selection of primary outcome measures and datasets. SM and SE led the ethics application process, review of data collection tools and contributed to the intervention and training development and evaluation plan. RW provided statistical expertise and sample size calculations for the RCT. All authors were involved in the revision of this protocol and made a significant contribution towards its intellectual content and approved the final version of the manuscript.

**Funding** This activity received grant funding from the Australian Government.



1  
2  
3 **Competing interests** None declared.  
4

5  
6 **Patient Consent** Not required.  
7

8  
9 **Ethics approval** Griffith University Human Research Ethics Committee (HREC/2019/473 and  
10 HREC/2019/493).  
11  
12

13  
14 **Provenance and peer review** Not commissioned; peer reviewed for ethical and funding approval  
15 prior to submission.  
16  
17

18  
19  
20  
21  
22  
23  
24  
25  
26  
27  
28  
29  
30  
31  
32  
33  
34  
35  
36  
37  
38  
39  
40  
41  
42  
43  
44  
45  
46  
47  
48  
49  
50  
51  
52  
53  
54  
55  
56  
57  
58  
59  
60

For peer review only

## REFERENCES

1. O'Reilly CL, Wong E, Chen TF. A feasibility study of community pharmacists performing depression screening services. *Res Social Adm Pharm* 2015;11(3):364-81.
2. Knox E, Dopheide J, Wincor M, et al. Depression screening in a university campus pharmacy: a pilot project. *J Am Pharm Assoc* 2006;46(4):502-06.
3. Rosser S, Frede S, Conrad WF, et al. Development, implementation, and evaluation of a pharmacist-conducted screening program for depression. *J Am Pharm Assoc* 2013;53(1):22-9.
4. Nishtala PS, McLachlan AJ, Bell JS, et al. Psychotropic prescribing in long-term care facilities: impact of medication reviews and educational interventions. *Am J Geriatr Psychiatry* 2008;16(8):621-32.
5. Schmidt I, Claesson CB, Westerholm B, et al. The impact of regular multidisciplinary team interventions on psychotropic prescribing in Swedish nursing homes. *J Am Geriatr Soc* 1998;46(1):77-82.
6. McMillan SS, Kelly F, Hattingh L, et al. The impact of a person-centred community pharmacy mental health medication support service on consumer outcomes. *J Ment Health* 2018;27(2):164-73.
7. Gisev N, JS. B, O'Reilly CL, et al. An expert panel assessment of comprehensive medication reviews for clients of community mental health teams. *Soc Psychiatry Psychiatr Epidemiol* 2010;45(11):1071-9.
8. Bell JS, Aslani P, McLachlan AJ, et al. Mental health case conferences in primary care: Content and treatment decision making. *Res Soc Adm Pharm* 2007;3(1):86-103.
9. Finley PR, Rens HR, Pont JT, et al. Impact of a collaborative pharmacy practice model on the treatment of depression in primary care. *Am J Health Syst Pharm* 2002;59(16):1518-26.
10. Gable K, Stunson M. Clinical pharmacist interventions on an assertive community treatment team. *Community Ment Health J* 2010;46(4):351-55.

- 1  
2  
3 11. Hansson L, Jormfeldt H, Svedberg P, et al. Mental health professionals' attitudes towards  
4  
5 people with mental illness: do they differ from attitudes held by people with mental illness? *Int*  
6  
7 *J Soc Psychiatry* 2013;59(1):48-54.  
8  
9
- 10 12. Rao H, Mahadevappa H, Pillay P, et al. A study of stigmatized attitudes towards people with  
11  
12 mental health problems among health professionals. *J Psychiatr Ment Health Nurs*  
13  
14 2009;16(3):279-84.  
15  
16
- 17 13. World Health Organisation. Guidelines for the management of physical health conditions in  
18  
19 adults with severe mental disorders. Geneva: WHO, 2018.  
20  
21
- 22 14. O'Reilly C, Bell S, Kelly P, et al. Exploring the relationship between mental health stigma,  
23  
24 knowledge and provision of pharmacy services for consumers with schizophrenia. *Res Social*  
25  
26 *Adm Pharm* 2015;11(3):e101-e09.  
27  
28
- 29 15. Wheeler A, Mey A, Kelly F, et al. Education and training for community pharmacists in  
30  
31 mental health practice: how to equip this workforce for the future. *J Mental Health Training*  
32  
33 *Educ Pract* 2014;9(3)  
34
- 35 16. Morgan V, Waterreus A, Jablensky A, et al. People living with psychotic illness 2010.  
36  
37 Canberra: Australian Government; National Mental Health Strategy, 2011.  
38  
39
- 40 17. Australian Institute of Health and Welfare. Mental health services - In brief. Canberra,  
41  
42 Australia: Australian Institute of Health and Welfare; 2019.  
43  
44
- 45 18. National Mental Health Commission (NMHC). Equally Well: Improving the physical health  
46  
47 and wellbeing of people living with mental illness in Australia. Sydney, Australia: NMHC,  
48  
49 2016.  
50
- 51 19. Ehrlich C, Chester P, Kisely S, et al. Making sense of self-care practices at the intersection of  
52  
53 severe mental illness and physical health: an Australian study. *Health Soc Care Community*  
54  
55 2018;26(1):e47-e55.  
56  
57  
58  
59  
60

- 1  
2  
3  
4  
5  
6  
7  
8  
9  
10  
11  
12  
13  
14  
15  
16  
17  
18  
19  
20  
21  
22  
23  
24  
25  
26  
27  
28  
29  
30  
31  
32  
33  
34  
35  
36  
37  
38  
39  
40  
41  
42  
43  
44  
45  
46  
47  
48  
49  
50  
51  
52  
53  
54  
55  
56  
57  
58  
59  
60
20. Morant N, Azam K, Johnson S, et al. The least worst option: user experiences of antipsychotic medication and lack of involvement in medication decisions in a UK community sample. *J Ment Health* 2018;27(4):322-28.
21. Young SJ, Praskova A, Hayward N, et al. Attending to physical health in mental health services in Australia: a qualitative study of service users' experiences and expectations. *Health Soc Care Community* 2017;25(2):602-11.
22. Wade M, Tai S, Awenat Y, et al. A systematic review of service-user reasons for adherence and nonadherence to neuroleptic medication in psychosis. *Clin Psychol Rev* 2017;51:75-95.
23. Masand PS, Roca M, Turner MS, et al. Partial adherence to antipsychotic medication impacts the course of illness in patients with schizophrenia: a review. *Prim Care Companion J Clin Psychiatry* 2009;11(4):147-54.
24. Farrelly S, Brown G, Szmukler G, et al. Can the therapeutic relationship predict 18 month outcomes for individuals with psychosis? *Psychiatry Res* 2014;220(1-2):585-91.
25. Bell SJ, Whitehead P, Aslani P, et al. Drug-Related Problems in the Community Setting. *Clin Drug Invest* 2006;26(7):415-25.
26. Nishtala PS, McLachlan AJ, Bell JS, et al. Psychotropic prescribing in long-term care facilities: impact of medication reviews and educational interventions. *Am J Geriatr Psychiatry* 2008;16(8):621-32.
27. Rubio-Valera M, Chen TF, O'Reilly CL. New roles for pharmacists in community mental health care: a narrative review. *Int J Environ Res Public Health* 2014;11
28. Valenstein M, Kavanagh J, Lee T, et al. Using a pharmacy-based intervention to improve antipsychotic adherence among patients with serious mental illness. *Schizophr Bull* 2011;37(4):727-36.

- 1  
2  
3 29. Hartung D, Low A, Jindai K, et al. Interventions to improve pharmacological adherence  
4 among adults with psychotic spectrum disorders and bipolar disorder: a systematic review.  
5  
6 *Psychosomatics* 2017;58(2):101-12.  
7  
8  
9  
10 30. Bouvy ML, Heerdink ER, Urquhart J, et al. Effect of a pharmacist-led intervention on diuretic  
11 compliance in heart failure patients: a randomized controlled study. *J Card Fail*  
12  
13 2003;9(5):404-11.  
14  
15  
16 31. Messerli M, Blozik E, Vriends N, et al. Impact of a community pharmacist-led medication  
17 review on medicines use in patients on polypharmacy: a prospective randomised controlled  
18 trial. *BMC Health Serv Res* 2016;16:145.  
19  
20  
21  
22  
23 32. The Community Pharmacy Medicines Management Project Evaluation Team. The MEDMAN  
24 study: a randomized controlled trial of community pharmacy-led medicines management for  
25 patients with coronary heart disease. *Fam Pract* 2007;24(2):189-200.  
26  
27  
28  
29  
30 33. Bernsten C, Bjorkman I, Caramona M, et al. Improving the well-being of elderly patients via  
31 community pharmacy-based provision of pharmaceutical care: a multicentre study in seven  
32 European countries. *Drugs Aging* 2001;18(1):63-77.  
33  
34  
35  
36  
37 34. Murphy AL, Gardner DM, Jacobs LM. Patient care activities by community pharmacists in a  
38 capitation funding model mental health and addictions program. *BMC Psychiatry*  
39  
40 2018;18(1):192.  
41  
42  
43  
44 35. Haslam L, Gardner DM, Murphy AL. A retrospective analysis of patient care activities in a  
45 community pharmacy mental illness and addictions program. *Res Social Adm Pharm* 2019  
46  
47  
48  
49 36. Australian Bureau of Statistics. ASGC Remoteness and Classification: Purpose and Use.  
50  
51 Canberra: ABS, 2003.  
52  
53  
54 37. Government of Western Australia. Rural Health West: South West – population and health  
55 snapshot. Western Australia: WA Country Health Service, 2015.  
56  
57  
58  
59  
60

- 1  
2  
3 38. New South Wales Government. Capacity Toolkit. State of New South Wales Attorney  
4  
5 General's Department of NSW 2008.  
6  
7  
8 39. Wheeler A, Fowler J, Hattingh L. Using an intervention mapping framework to develop an  
9  
10 online mental health continuing education program for pharmacy staff. *J Contin Educ Health*  
11  
12 *Prof* 2013;33(4):258-66.  
13  
14  
15 40. O'Reilly CL, Bell JS, Chen TF. Pharmacists' beliefs about treatments and outcomes of mental  
16  
17 disorders: A mental health literacy survey. *Aust N Z J Psychiatry* 2010;44(12):1089-96.  
18  
19  
20 41. Knox K, Fejzic J, Mey A, et al. Mental health consumer and caregiver perceptions of stigma  
21  
22 in Australian community pharmacies. *Int J Soc Psychiatry* 2014;60(6):533-43.  
23  
24  
25 42. O'Reilly CL, Bell SJ, Kelly PJ, et al. Impact of mental health first aid training on pharmacy  
26  
27 students' knowledge, attitudes and self-reported behaviour: a controlled trial. *Aust N Z J*  
28  
29 *Psychiatry* 2011;45(7):549-57.  
30  
31  
32 43. El-Den S, Chen TF, Moles RJ, et al. Assessing Mental Health First Aid skills using simulated  
33  
34 patients. *Am J Pharm Educ* 2018;82(2):6222.  
35  
36  
37 44. Boukouvalas E, El-Den S, Chen TF, et al. Confidence and attitudes of pharmacy students  
38  
39 towards mental health crises: patient simulation using people with a lived experience. *Soc*  
40  
41 *Psychiatry Psychiatr Epidemiol* 2018;53(11):1185-95.  
42  
43  
44 45. O'Reilly CL, Bell JS, Chen TF. Consumer-led mental health education for pharmacy students.  
45  
46 *Am J Pharm Educ* 2010;74(9)  
47  
48  
49 46. Fowler JL, McConachie B, Hattingh L, et al. Mentoring pharmacy staff to implement a  
50  
51 medication support service: An evaluation of process and outcomes. *Curr Pharm Teach Learn*  
52  
53 2018;10(7):886-94.  
54  
55  
56 47. Hattingh HL, Knox K, Fejzic J, et al. Privacy and confidentiality: perspectives of mental  
57  
58 health consumers and carers in pharmacy settings. *Int J Pharm Pract* 2015;23(1):52-60.  
59  
60

- 1  
2  
3 48. O'Reilly C, Bell J, Chen T. Mental health consumers and caregivers as instructors for health  
4 professional students: a qualitative study. *Soc Psychiatry Psychiatr Epidemiol* 2011;47(4):607-  
5  
6 13.  
7  
8  
9  
10 49. Mental Health First Aid Australia. Blended MHFA in the Pharmacy. Victoria: MHFA  
11  
12 Australia; 2019.  
13  
14 50. O'Reilly Claire L, Moles Rebekah J, Boukouvalas E, et al. Assessing students' mental health  
15 crisis skills via consumers with lived experience: a qualitative evaluation. *J Ment Health Train*  
16  
17 *Educ Pract* 2019;14(5):361-71.  
18  
19  
20 51. Pharmaceutical Society of Australia, 6th Community Pharmacy Agreement. Guidelines for  
21 pharmacists providing MedsCheck and Diabetes MedsCheck services. Deakin West, ACT:  
22  
23 Pharmaceutical Society of Australia, 2017.  
24  
25  
26 52. Horne R, Weinman J, Hankins M. The beliefs about medicines questionnaire: the development  
27 and evaluation of a new method for assessing the cognitive representation of medication.  
28  
29 *Psychol Health* 1999;14(1):1-24.  
30  
31  
32 53. Nguyen TM, La Caze A, Cottrell N. What are validated self-report adherence scales really  
33 measuring?: a systematic review. *Br J Clin Pharmacol* 2014;77(3):427-45.  
34  
35  
36 54. Sattler EL, Lee JS, Perri M, 3rd. Medication (re)fill adherence measures derived from  
37 pharmacy claims data in older Americans: a review of the literature. *Drugs Aging*  
38  
39 2013;30(6):383-99.  
40  
41  
42 55. Royal Australian and New Zealand College of Psychiatrists. Keeping Body and Mind  
43 Together - Improving the physical health and life expectancy of people with serious mental  
44 illness. . Melbourne, Australia and Wellington, New Zealand: Royal Australian and New  
45  
46 Zealand College of Psychiatrists (RANZCP), 2015.  
47  
48  
49 56. Vancampfort D, Stubbs B, Probst M, et al. Physical activity as a vital sign in patients with  
50 schizophrenia: evidence and clinical recommendations. *Schizophr Res* 2016;170(2-3):336-40.  
51  
52  
53  
54  
55  
56  
57  
58  
59  
60

- 1  
2  
3 57. Australian Bureau of Statistics. National Health Survey 2017-2018 Questionnaire. ABS; 2018.  
4  
5  
6 58. World Health Organization (WHO) ASSIST Working Group. The Alcohol, Smoking and  
7  
8 Substance Involvement Screening Test (ASSIST): development, reliability and feasibility.  
9  
10 *Addiction* 2002;97(9):1183-94.  
11  
12 59. Humeniuk R, Ali R, Babor T, et al. Validation of the Alcohol Smoking and Substance  
13  
14 Involvement Screening Test (ASSIST). *Addiction* 2008;103(6):1039-47.  
15  
16 60. Ashoorian D, Davidson R, Rock D, et al. A clinical communication tool for the assessment of  
17  
18 psychotropic medication side effects. *Psychiatry Res* 2015;230(2):643-57.  
19  
20 61. Rosenbaum S, Ward PB. The Simple Physical Activity Questionnaire. *Lancet Psychiatry*  
21  
22 2016;3(1):e1.  
23  
24 62. SIMPAQ. Simple Physical Activity Questionnaire (SIMPAQ). 2019.  
25  
26 63. Smyth C. The Pittsburgh Sleep Quality Index (PSQI). 2012.  
27  
28 64. Heatherton TF, Kozlowski LT, Frecker RC, et al. The Fagerstrom Test for Nicotine  
29  
30 Dependence: a revision of the Fagerstrom Tolerance Questionnaire. *Br J Addict*  
31  
32 1991;86(9):1119-27.  
33  
34 65. Cleeland C, Ryan K. Pain assessment: global use of the Brief Pain Inventory. *Ann Acad Med*  
35  
36 *Singapore* 1994;23(2):129-38.  
37  
38 66. Dworkin RH, Turk DC, Farrar JT, et al. Core outcome measures for chronic pain clinical  
39  
40 trials: IMMPACT recommendations. *Pain* 2005;113(1-2):9-19.  
41  
42 67. Kiresuk TJ, Sherman RE. Goal attainment scaling: A general method for evaluating  
43  
44 comprehensive community mental health programs. *Community Ment Health J*  
45  
46 1968;4(6):443-53.  
47  
48 68. Richardson JR, Peacock SJ, Hawthorne G, et al. Construction of the descriptive system for the  
49  
50 assessment of quality of life AQoL-6D utility instrument. *Health Qual Life Outcomes*  
51  
52 2012;10(1):38.  
53  
54  
55  
56  
57  
58  
59  
60



- 1  
2  
3 69. Bastien CH, Vallieres A, Morin CM. Validation of the Insomnia Severity Index as an outcome  
4 measure for insomnia research. *Sleep Med* 2001;2(4):297-307.  
5  
6  
7  
8 70. Duncan P, Murphy M, Man M-S, et al. Development and validation of the Multimorbidity  
9 Treatment Burden Questionnaire (MTBQ). 2018;8(4):e019413.  
10  
11  
12 71. Hogan TP, Awad AG, Eastwood R. A self-report scale predictive of drug compliance in  
13 schizophrenics: reliability and discriminative validity. *Psychol Med* 1983;13(1):177-83.  
14  
15  
16 72. Nielsen RE, Lindström E, Nielsen J, et al. DAI-10 is as good as DAI-30 in schizophrenia. *Eur*  
17 *Neuropsychopharmacol* 2012;22(10):747-50.  
18  
19  
20 73. Broadbent E, Petrie KJ, Main J, et al. The brief illness perception questionnaire. *J Psychosom*  
21 *Res* 2006;60(6):631-7.  
22  
23  
24 74. Mental Health First Aid Australia. Blended MHFA in the Pharmacy. Victoria: MHFA  
25 Australia; 2018.  
26  
27  
28 75. Jorm AF, Oh E. Desire for social distance from people with mental disorders. *Aust N Z J*  
29 *Psychiatry* 2009;43(3):183-200.  
30  
31  
32 76. Kobau R, Dilirio C, Chapman D, et al. Attitudes towards mental illness and its treatment:  
33 validation of a generic scale for public health surveillance of mental illness associated stigma.  
34 *Comm Mental Health J* 2010;46(2):164-76.  
35  
36  
37 77. Watkins A, Rosenbaum S, Ward PB, et al. The validity and reliability characteristics of the M-  
38 BACK questionnaire to assess the barriers, attitudes, confidence, and knowledge of mental  
39 health staff regarding metabolic health of mental health service users. *Front Public Health*  
40 2017;5:321-21.  
41  
42  
43 78. Phokeo V, Sproule B, Raman-Wilms L. Community pharmacists' attitudes toward and  
44 professional interactions with users of psychiatric medication. *Psychiatr Serv*  
45 2004;55(12):1434-6.  
46  
47  
48  
49  
50  
51  
52  
53  
54  
55  
56  
57  
58  
59  
60

- 1  
2  
3 79. Cates ME, Burton AR, Woolley TW. Attitudes of pharmacists toward mental illness and  
4  
5 providing pharmaceutical care to the mentally ill. *Ann Pharmacother* 2005;39(9):1450-5.  
6  
7  
8 80. Braun V, Clarke V. Using thematic analysis in psychology. *Qual Res Psychol* 2006;3(2):77-  
9  
10 101.  
11  
12 81. Williams M, Peterson GM, Tenni PC, et al. DOCUMENT: a system for classifying drug-  
13  
14 related problems in community pharmacy. *Int J Clin Pharm* 2012;34(1):43-52.  
15  
16  
17 82. Kessler RC, Barker PR, Colpe LJ, et al. Screening for serious mental illness in the general  
18  
19 population. *Arch Gen Psychiatry* 2003;60(2):184-9.  
20  
21  
22  
23  
24  
25  
26  
27  
28  
29  
30  
31  
32  
33  
34  
35  
36  
37  
38  
39  
40  
41  
42  
43  
44  
45  
46  
47  
48  
49  
50  
51  
52  
53  
54  
55  
56  
57  
58  
59  
60

**Table 1:** Data collection

| Type of evaluation          | Description/measure                                                                                                                                                                                                                                                                                                                                            | Data source                                                                                                                                                      | Time-point in weeks (RCT) |   |    |
|-----------------------------|----------------------------------------------------------------------------------------------------------------------------------------------------------------------------------------------------------------------------------------------------------------------------------------------------------------------------------------------------------------|------------------------------------------------------------------------------------------------------------------------------------------------------------------|---------------------------|---|----|
|                             |                                                                                                                                                                                                                                                                                                                                                                |                                                                                                                                                                  | Before RCT                | 0 | 26 |
| Formative                   | Training evaluation (paired pre- and post-questionnaires)                                                                                                                                                                                                                                                                                                      | Pharmacists in IG and CG                                                                                                                                         |                           |   |    |
| Adherence                   | MPR and medicine persistence<br>RAM <sup>52</sup> scale                                                                                                                                                                                                                                                                                                        | Pharmacy                                                                                                                                                         |                           |   |    |
|                             |                                                                                                                                                                                                                                                                                                                                                                | PBS data                                                                                                                                                         |                           |   |    |
|                             |                                                                                                                                                                                                                                                                                                                                                                | GuildCare NG <sup>TM</sup> documentation (all consumer participants)                                                                                             |                           |   |    |
| Medication outcomes         | Identification of MRPs and management (MedsCheck or DOCUMENT system <sup>81</sup> )                                                                                                                                                                                                                                                                            | GuildCare NG <sup>TM</sup> documentation (all consumer participants)                                                                                             |                           |   |    |
| Goal achievement            | Type and number of goals set, goal achievement (GAS) <sup>67</sup>                                                                                                                                                                                                                                                                                             | GuildCare NG documentation (IG consumer participants)                                                                                                            |                           |   |    |
| Clinical measurements       | Clinical measures for each consumer participant<br>- Weight / Height (Body Mass Index)<br>- Abdominal girth<br>- Blood pressure                                                                                                                                                                                                                                | GuildCare NG <sup>TM</sup> documentation (all consumer participants)                                                                                             |                           |   |    |
|                             |                                                                                                                                                                                                                                                                                                                                                                | Prescribers / other health workers                                                                                                                               |                           |   |    |
| Health and related outcomes | - PAVS, <sup>56</sup> Dietary Behaviour, <sup>57</sup> ASSIST <sup>58,59</sup> AQoL-6D, <sup>68</sup> ISI, <sup>69</sup> MTBQ, <sup>70</sup> DAI-10, <sup>71,72</sup> BIPQ, <sup>73</sup> K6 <sup>82</sup><br><br>- M3Q <sup>60</sup> SIMPAQ, <sup>61,62</sup> PSQI, <sup>63</sup> Fagerström Test for Nicotine Dependence, <sup>64</sup> BPI <sup>65,66</sup> | - GuildCare NG <sup>TM</sup> documentation (all consumer participants)                                                                                           |                           |   |    |
|                             |                                                                                                                                                                                                                                                                                                                                                                | - IG consumer participants only                                                                                                                                  |                           |   |    |
| Impact                      | - Consumer reported experience measure<br><br>- Semi-structured interviews (service implementation, acceptability)<br><br>- Online survey (service acceptability)                                                                                                                                                                                              | - IG consumer participants only                                                                                                                                  |                           |   |    |
|                             |                                                                                                                                                                                                                                                                                                                                                                | - IG consumer participants (n=20), IG pharmacists (n=24)<br><br>- Other health care professionals (e.g. GP, psychiatrist, MH case manager) and IG pharmacy staff |                           |   |    |
|                             | Health care utilisation                                                                                                                                                                                                                                                                                                                                        | Primary care, MBS, hospitalisation                                                                                                                               |                           |   |    |
| Economic appraisal          | RCT-based economic evaluation (e.g. resources, incentive payments, time)<br><br>Cost-effectiveness (health-care sector perspective)                                                                                                                                                                                                                            | Cost of intervention, MBS, PBS, pharmacy dispensing data                                                                                                         |                           |   |    |
|                             |                                                                                                                                                                                                                                                                                                                                                                | AQoL-6D <sup>68</sup>                                                                                                                                            |                           |   |    |
|                             |                                                                                                                                                                                                                                                                                                                                                                | Cost per additional adherer<br>Cost per additional quality adjusted life year                                                                                    |                           |   |    |

*Hospitalisation, Emergency department admissions, MBS and PBS data will be obtained for 12-months before, and the entire duration of the RCT. Health outcomes data and prescription dispensing data will be obtained for the entire length of the RCT. Abbreviations: ASSIST=Alcohol Smoking and Substance Involvement Screening Test; AQoL-6D=Assessment of Quality of Life; BIPQ = Brief Illness Perception Questionnaire; DAI-10 = Drug Attitude Inventory 10; DOCUMENT=Drug selection, Over/Under dose, Compliance, Untreated indications, Monitoring, Education or information, Non-clinical, Toxicity or adverse reactions; GAS=Goal Attainment Scale; ISI=Insomnia Severity Index; K6=Kessler Psychological Distress Scale; M3Q=My Medicines and Me Questionnaire; MPR=Medicine Possession Ratio; MTBQ=Multimorbidity Treatment Burden Questionnaire; PAVS=Physical Activity Vital Sign Questionnaire; BPI=Brief Pain Inventory; PSQI=Pittsburgh Sleep Quality Index; RAM=Reported Adherence to Medicine Scale; SIMPAQ=Simple Physical Activity Questionnaire.*

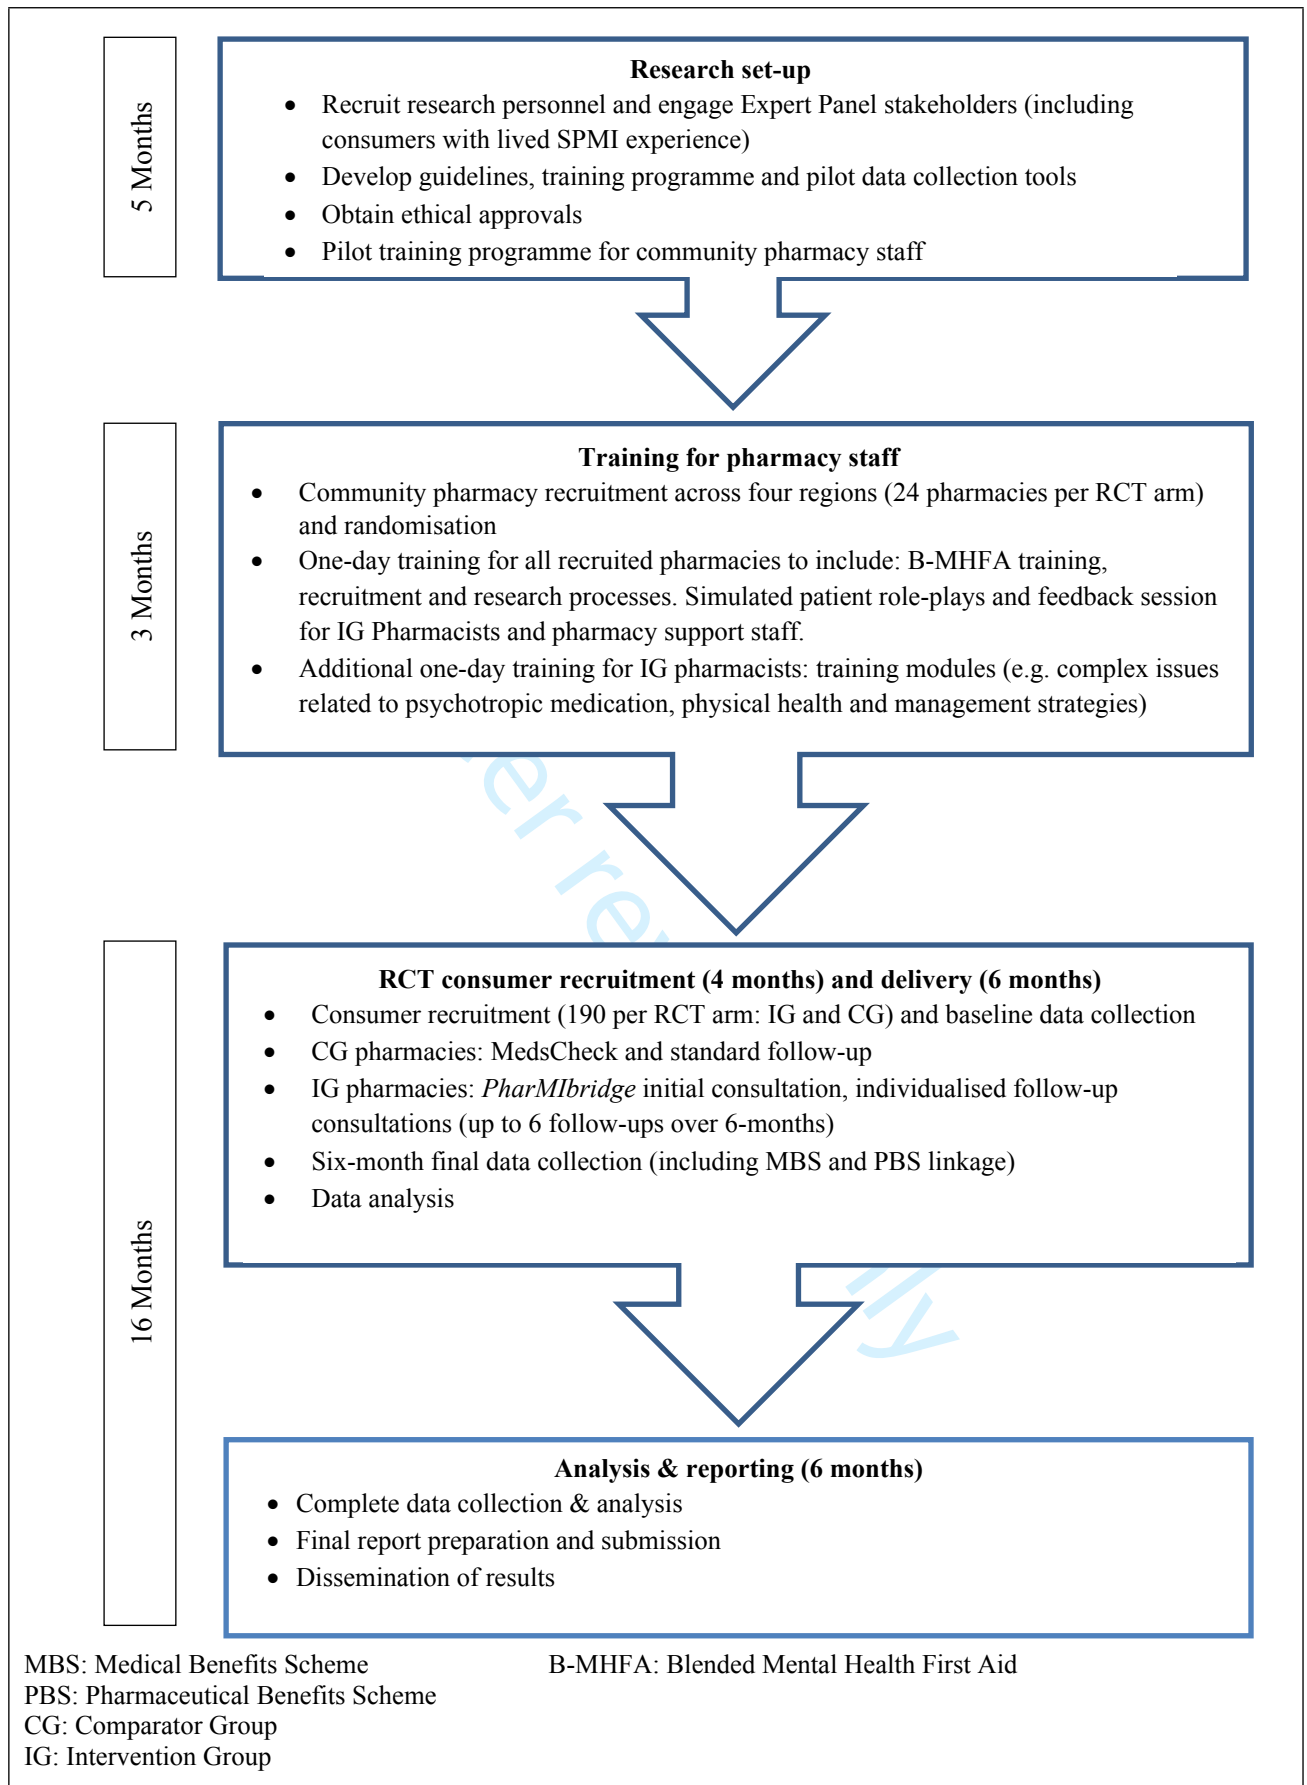

**Figure 1:** Overview of the research stages and timing

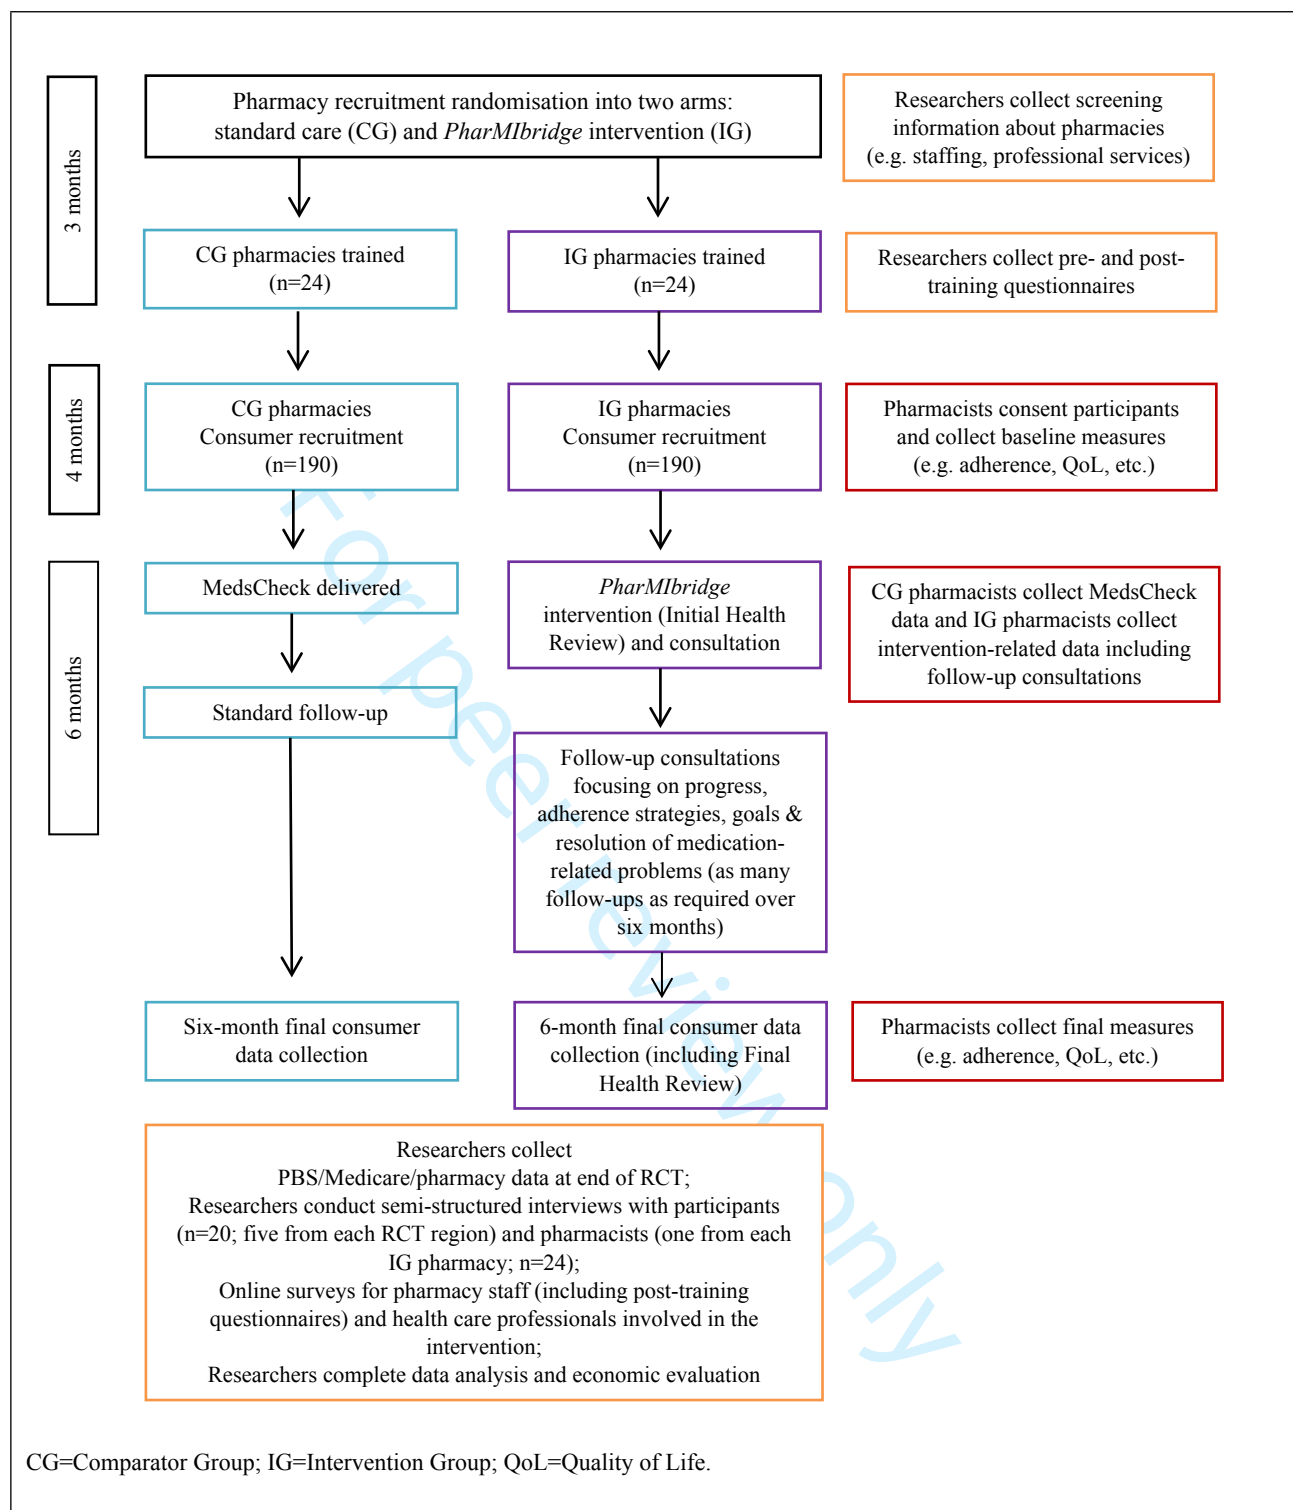

**Figure 2:** Overview of the *PharMIbridge* RCT

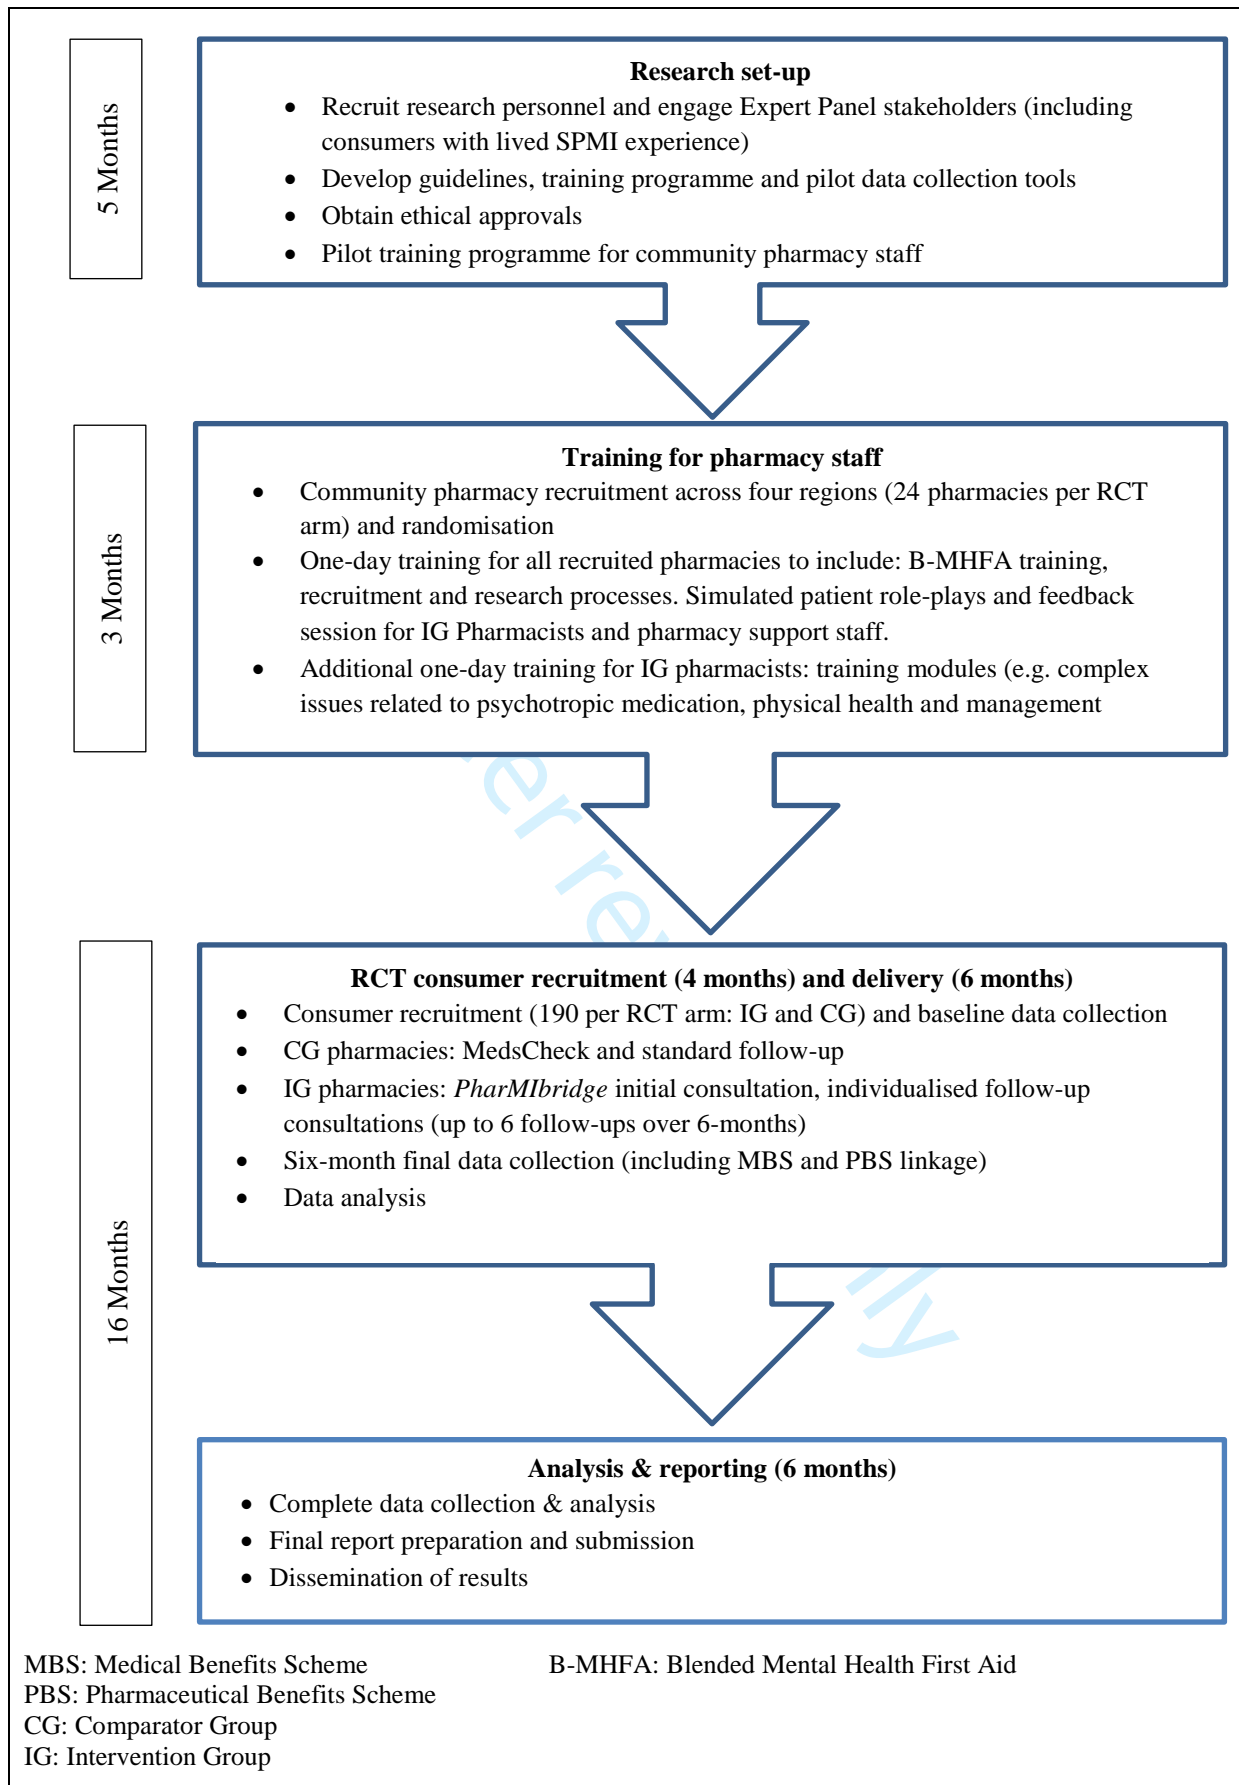

**Figure 1:** Overview of the research stages and timing

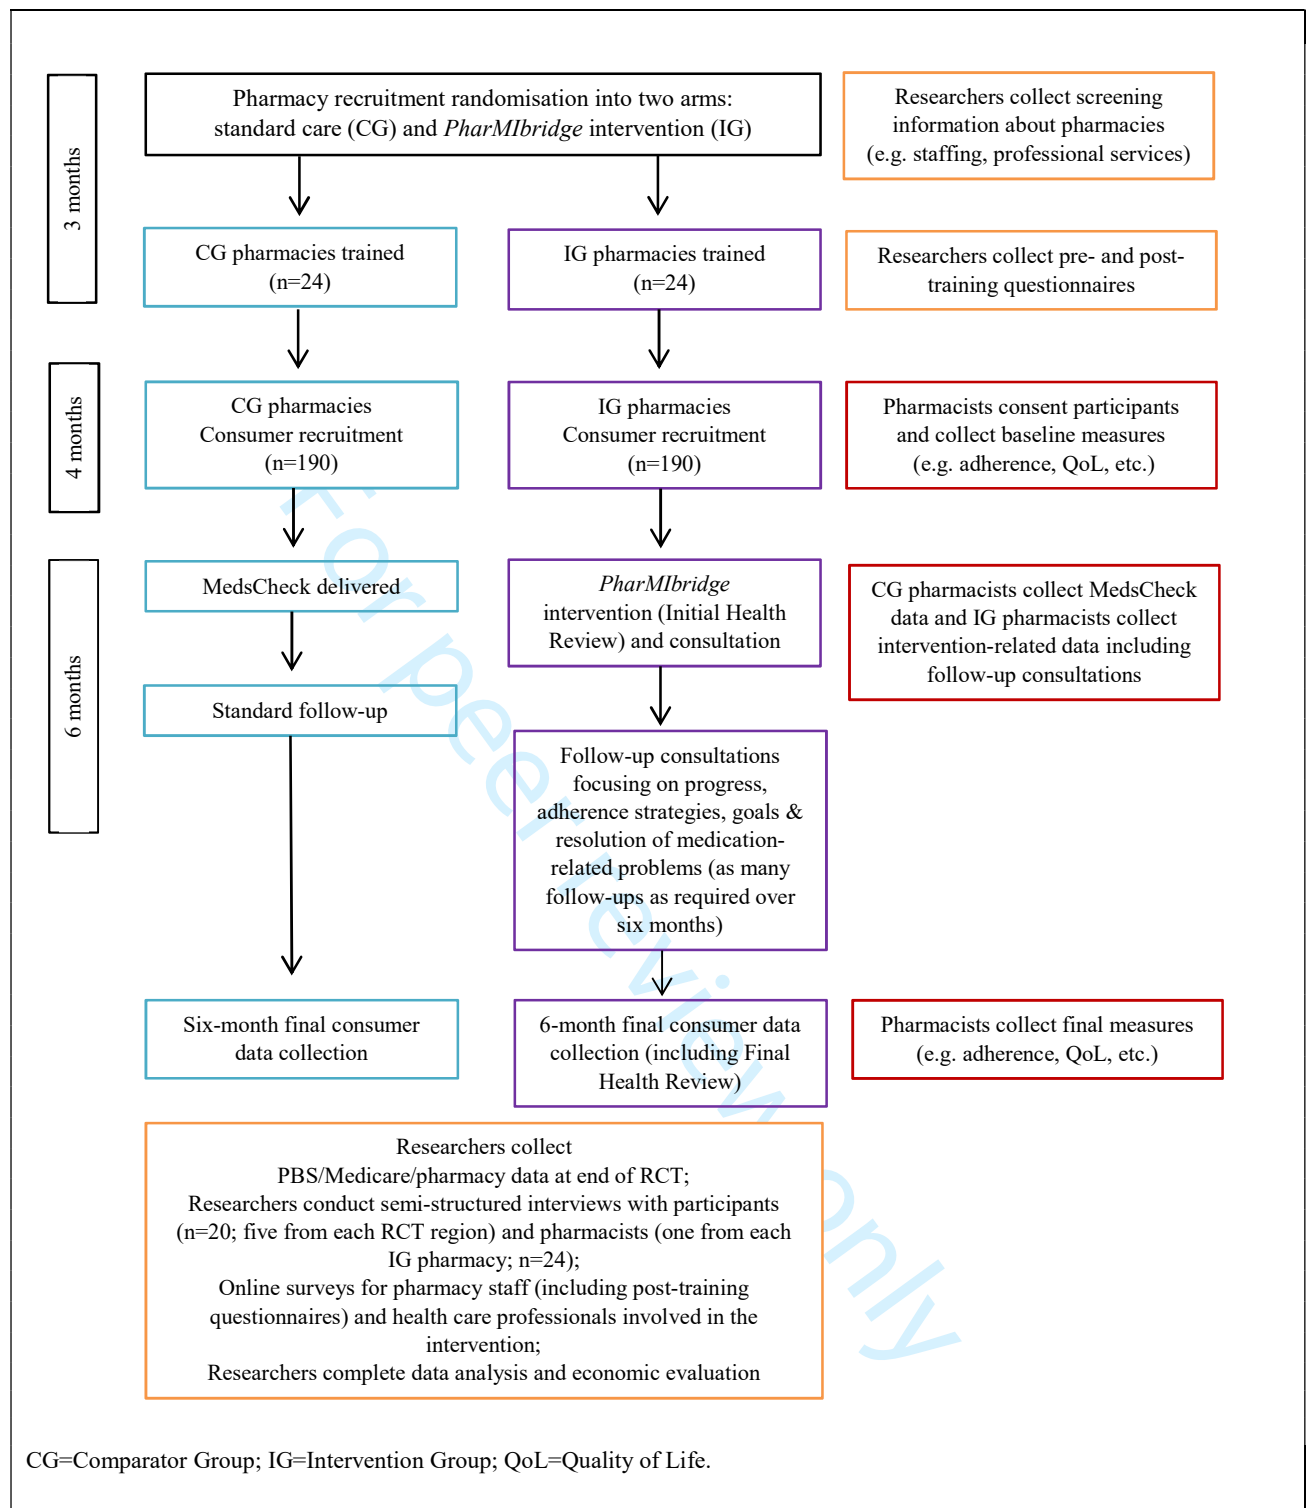

**Figure 2:** Overview of the *PharMIbridge* RCT

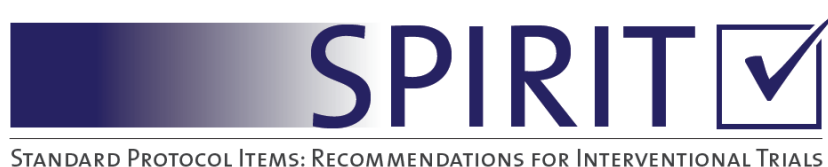

SPIRIT 2013 Checklist: Recommended items to address in a clinical trial protocol and related documents\*

| Section/item                      | Item No | Description                                                                                                                                                                                                                                                                              |
|-----------------------------------|---------|------------------------------------------------------------------------------------------------------------------------------------------------------------------------------------------------------------------------------------------------------------------------------------------|
| <b>Administrative information</b> |         |                                                                                                                                                                                                                                                                                          |
| Title                             | 1       | Descriptive title identifying the study design, population, interventions, and, if applicable, trial acronym                                                                                                                                                                             |
| Trial registration                | 2a      | Trial identifier and registry name. If not yet registered, name of intended registry                                                                                                                                                                                                     |
|                                   | 2b      | All items from the World Health Organization Trial Registration Data Set                                                                                                                                                                                                                 |
| Protocol version                  | 3       | Date and version identifier                                                                                                                                                                                                                                                              |
| Funding                           | 4       | Sources and types of financial, material, and other support                                                                                                                                                                                                                              |
| Roles and responsibilities        | 5a      | Names, affiliations, and roles of protocol contributors                                                                                                                                                                                                                                  |
|                                   | 5b      | Name and contact information for the trial sponsor                                                                                                                                                                                                                                       |
|                                   | 5c      | Role of study sponsor and funders, if any, in study design; collection, management, analysis, and interpretation of data; writing of the report; and the decision to submit the report for publication, including whether they will have ultimate authority over any of these activities |
|                                   | 5d      | Composition, roles, and responsibilities of the coordinating centre, steering committee, endpoint adjudication committee, data management team, and other individuals or groups overseeing the trial, if applicable (see Item 21a for data monitoring committee)                         |
| <b>Introduction</b>               |         |                                                                                                                                                                                                                                                                                          |
| Background and rationale          | 6a      | Description of research question and justification for undertaking the trial, including summary of relevant studies (published and unpublished) examining benefits and harms for each intervention                                                                                       |
|                                   | 6b      | Explanation for choice of comparators                                                                                                                                                                                                                                                    |
| Objectives                        | 7       | Specific objectives or hypotheses                                                                                                                                                                                                                                                        |
| Trial design                      | 8       | Description of trial design including type of trial (eg, parallel group, crossover, factorial, single group), allocation ratio, and framework (eg, superiority, equivalence, noninferiority, exploratory)                                                                                |



## Methods: Participants, interventions, and outcomes

|                      |     |                                                                                                                                                                                                                                                                                                                                                                                |
|----------------------|-----|--------------------------------------------------------------------------------------------------------------------------------------------------------------------------------------------------------------------------------------------------------------------------------------------------------------------------------------------------------------------------------|
| Study setting        | 9   | Description of study settings (eg, community clinic, academic hospital) and list of countries where data will be collected. Reference to where list of study sites can be obtained                                                                                                                                                                                             |
| Eligibility criteria | 10  | Inclusion and exclusion criteria for participants. If applicable, eligibility criteria for study centres and individuals who will perform the interventions (eg, surgeons, psychotherapists)                                                                                                                                                                                   |
| Interventions        | 11a | Interventions for each group with sufficient detail to allow replication, including how and when they will be administered                                                                                                                                                                                                                                                     |
|                      | 11b | Criteria for discontinuing or modifying allocated interventions for a given trial participant (eg, drug dose change in response to harms, participant request, or improving/worsening disease)                                                                                                                                                                                 |
|                      | 11c | Strategies to improve adherence to intervention protocols, and any procedures for monitoring adherence (eg, drug tablet return, laboratory tests)                                                                                                                                                                                                                              |
|                      | 11d | Relevant concomitant care and interventions that are permitted or prohibited during the trial                                                                                                                                                                                                                                                                                  |
| Outcomes             | 12  | Primary, secondary, and other outcomes, including the specific measurement variable (eg, systolic blood pressure), analysis metric (eg, change from baseline, final value, time to event), method of aggregation (eg, median, proportion), and time point for each outcome. Explanation of the clinical relevance of chosen efficacy and harm outcomes is strongly recommended |
| Participant timeline | 13  | Time schedule of enrolment, interventions (including any run-ins and washouts), assessments, and visits for participants. A schematic diagram is highly recommended (see Figure)                                                                                                                                                                                               |
| Sample size          | 14  | Estimated number of participants needed to achieve study objectives and how it was determined, including clinical and statistical assumptions supporting any sample size calculations                                                                                                                                                                                          |
| Recruitment          | 15  | Strategies for achieving adequate participant enrolment to reach target sample size                                                                                                                                                                                                                                                                                            |

## Methods: Assignment of interventions (for controlled trials)

### Allocation:

|                     |     |                                                                                                                                                                                                                                                                                                                                                          |
|---------------------|-----|----------------------------------------------------------------------------------------------------------------------------------------------------------------------------------------------------------------------------------------------------------------------------------------------------------------------------------------------------------|
| Sequence generation | 16a | Method of generating the allocation sequence (eg, computer-generated random numbers), and list of any factors for stratification. To reduce predictability of a random sequence, details of any planned restriction (eg, blocking) should be provided in a separate document that is unavailable to those who enrol participants or assign interventions |
|---------------------|-----|----------------------------------------------------------------------------------------------------------------------------------------------------------------------------------------------------------------------------------------------------------------------------------------------------------------------------------------------------------|

|    |                |     |                                                                         |
|----|----------------|-----|-------------------------------------------------------------------------|
| 1  |                |     |                                                                         |
| 2  | Allocation     | 16b | Mechanism of implementing the allocation sequence (eg, central          |
| 3  | concealment    |     | telephone; sequentially numbered, opaque, sealed envelopes),            |
| 4  | mechanism      |     | describing any steps to conceal the sequence until interventions are    |
| 5  |                |     | assigned                                                                |
| 6  |                |     |                                                                         |
| 7  | Implementation | 16c | Who will generate the allocation sequence, who will enrol participants, |
| 8  |                |     | and who will assign participants to interventions                       |
| 9  |                |     |                                                                         |
| 10 | Blinding       | 17a | Who will be blinded after assignment to interventions (eg, trial        |
| 11 | (masking)      |     | participants, care providers, outcome assessors, data analysts), and    |
| 12 |                |     | how                                                                     |
| 13 |                | 17b | If blinded, circumstances under which unblinding is permissible, and    |
| 14 |                |     | procedure for revealing a participant's allocated intervention during   |
| 15 |                |     | the trial                                                               |
| 16 |                |     |                                                                         |
| 17 |                |     |                                                                         |
| 18 |                |     |                                                                         |
| 19 |                |     |                                                                         |

### Methods: Data collection, management, and analysis

|    |                 |     |                                                                          |
|----|-----------------|-----|--------------------------------------------------------------------------|
| 20 |                 |     |                                                                          |
| 21 | Data collection | 18a | Plans for assessment and collection of outcome, baseline, and other      |
| 22 | methods         |     | trial data, including any related processes to promote data quality (eg, |
| 23 |                 |     | duplicate measurements, training of assessors) and a description of      |
| 24 |                 |     | study instruments (eg, questionnaires, laboratory tests) along with      |
| 25 |                 |     | their reliability and validity, if known. Reference to where data        |
| 26 |                 |     | collection forms can be found, if not in the protocol                    |
| 27 |                 | 18b | Plans to promote participant retention and complete follow-up,           |
| 28 |                 |     | including list of any outcome data to be collected for participants who  |
| 29 |                 |     | discontinue or deviate from intervention protocols                       |
| 30 |                 |     |                                                                          |
| 31 | Data            | 19  | Plans for data entry, coding, security, and storage, including any       |
| 32 | management      |     | related processes to promote data quality (eg, double data entry;        |
| 33 |                 |     | range checks for data values). Reference to where details of data        |
| 34 |                 |     | management procedures can be found, if not in the protocol               |
| 35 |                 |     |                                                                          |
| 36 | Statistical     | 20a | Statistical methods for analysing primary and secondary outcomes.        |
| 37 | methods         |     | Reference to where other details of the statistical analysis plan can be |
| 38 |                 |     | found, if not in the protocol                                            |
| 39 |                 | 20b | Methods for any additional analyses (eg, subgroup and adjusted           |
| 40 |                 |     | analyses)                                                                |
| 41 |                 | 20c | Definition of analysis population relating to protocol non-adherence     |
| 42 |                 |     | (eg, as randomised analysis), and any statistical methods to handle      |
| 43 |                 |     | missing data (eg, multiple imputation)                                   |
| 44 |                 |     |                                                                          |
| 45 |                 |     |                                                                          |
| 46 |                 |     |                                                                          |
| 47 |                 |     |                                                                          |
| 48 |                 |     |                                                                          |
| 49 |                 |     |                                                                          |
| 50 |                 |     |                                                                          |
| 51 |                 |     |                                                                          |

### Methods: Monitoring

|    |                 |     |                                                                      |
|----|-----------------|-----|----------------------------------------------------------------------|
| 52 |                 |     |                                                                      |
| 53 | Data monitoring | 21a | Composition of data monitoring committee (DMC); summary of its role  |
| 54 |                 |     | and reporting structure; statement of whether it is independent from |
| 55 |                 |     | the sponsor and competing interests; and reference to where further  |
| 56 |                 |     | details about its charter can be found, if not in the protocol.      |
| 57 |                 |     | Alternatively, an explanation of why a DMC is not needed             |
| 58 |                 |     |                                                                      |
| 59 |                 |     |                                                                      |
| 60 |                 |     |                                                                      |

|    |          |     |                                                                        |
|----|----------|-----|------------------------------------------------------------------------|
| 1  |          |     |                                                                        |
| 2  |          | 21b | Description of any interim analyses and stopping guidelines, including |
| 3  |          |     | who will have access to these interim results and make the final       |
| 4  |          |     | decision to terminate the trial                                        |
| 5  |          |     |                                                                        |
| 6  | Harms    | 22  | Plans for collecting, assessing, reporting, and managing solicited and |
| 7  |          |     | spontaneously reported adverse events and other unintended effects     |
| 8  |          |     | of trial interventions or trial conduct                                |
| 9  |          |     |                                                                        |
| 10 |          |     |                                                                        |
| 11 | Auditing | 23  | Frequency and procedures for auditing trial conduct, if any, and       |
| 12 |          |     | whether the process will be independent from investigators and the     |
| 13 |          |     | sponsor                                                                |
| 14 |          |     |                                                                        |

## Ethics and dissemination

|    |                   |     |                                                                               |
|----|-------------------|-----|-------------------------------------------------------------------------------|
| 15 |                   |     |                                                                               |
| 16 |                   |     |                                                                               |
| 17 | Research ethics   | 24  | Plans for seeking research ethics committee/institutional review board        |
| 18 | approval          |     | (REC/IRB) approval                                                            |
| 19 |                   |     |                                                                               |
| 20 |                   |     |                                                                               |
| 21 | Protocol          | 25  | Plans for communicating important protocol modifications (eg,                 |
| 22 | amendments        |     | changes to eligibility criteria, outcomes, analyses) to relevant parties      |
| 23 |                   |     | (eg, investigators, REC/IRBs, trial participants, trial registries, journals, |
| 24 |                   |     | regulators)                                                                   |
| 25 |                   |     |                                                                               |
| 26 | Consent or assent | 26a | Who will obtain informed consent or assent from potential trial               |
| 27 |                   |     | participants or authorised surrogates, and how (see Item 32)                  |
| 28 |                   |     |                                                                               |
| 29 |                   | 26b | Additional consent provisions for collection and use of participant data      |
| 30 |                   |     | and biological specimens in ancillary studies, if applicable                  |
| 31 |                   |     |                                                                               |
| 32 |                   |     |                                                                               |
| 33 | Confidentiality   | 27  | How personal information about potential and enrolled participants will       |
| 34 |                   |     | be collected, shared, and maintained in order to protect confidentiality      |
| 35 |                   |     | before, during, and after the trial                                           |
| 36 |                   |     |                                                                               |
| 37 | Declaration of    | 28  | Financial and other competing interests for principal investigators for       |
| 38 | interests         |     | the overall trial and each study site                                         |
| 39 |                   |     |                                                                               |
| 40 |                   |     |                                                                               |
| 41 | Access to data    | 29  | Statement of who will have access to the final trial dataset, and             |
| 42 |                   |     | disclosure of contractual agreements that limit such access for               |
| 43 |                   |     | investigators                                                                 |
| 44 |                   |     |                                                                               |
| 45 | Ancillary and     | 30  | Provisions, if any, for ancillary and post-trial care, and for                |
| 46 | post-trial care   |     | compensation to those who suffer harm from trial participation                |
| 47 |                   |     |                                                                               |
| 48 | Dissemination     | 31a | Plans for investigators and sponsor to communicate trial results to           |
| 49 | policy            |     | participants, healthcare professionals, the public, and other relevant        |
| 50 |                   |     | groups (eg, via publication, reporting in results databases, or other         |
| 51 |                   |     | data sharing arrangements), including any publication restrictions            |
| 52 |                   |     |                                                                               |
| 53 |                   |     |                                                                               |
| 54 |                   | 31b | Authorship eligibility guidelines and any intended use of professional        |
| 55 |                   |     | writers                                                                       |
| 56 |                   |     |                                                                               |
| 57 |                   | 31c | Plans, if any, for granting public access to the full protocol, participant-  |
| 58 |                   |     | level dataset, and statistical code                                           |
| 59 |                   |     |                                                                               |
| 60 |                   |     |                                                                               |

## Appendices

|                            |    |                                                                                                                                                                                                |
|----------------------------|----|------------------------------------------------------------------------------------------------------------------------------------------------------------------------------------------------|
| Informed consent materials | 32 | Model consent form and other related documentation given to participants and authorised surrogates                                                                                             |
| Biological specimens       | 33 | Plans for collection, laboratory evaluation, and storage of biological specimens for genetic or molecular analysis in the current trial and for future use in ancillary studies, if applicable |

---

\*It is strongly recommended that this checklist be read in conjunction with the SPIRIT 2013 Explanation & Elaboration for important clarification on the items. Amendments to the protocol should be tracked and dated. The SPIRIT checklist is copyrighted by the SPIRIT Group under the Creative Commons "[Attribution-NonCommercial-NoDerivs 3.0 Unported](#)" license.

For peer review only

# BMJ Open

## Bridging the gap between physical and mental illness in community pharmacy (PharMIbridge): protocol for an Australian cluster randomised controlled trial

|                                 |                                                                                                                                                                                                                                                                                                                                                                                                                                                                                                                                                                                                          |
|---------------------------------|----------------------------------------------------------------------------------------------------------------------------------------------------------------------------------------------------------------------------------------------------------------------------------------------------------------------------------------------------------------------------------------------------------------------------------------------------------------------------------------------------------------------------------------------------------------------------------------------------------|
| Journal:                        | <i>BMJ Open</i>                                                                                                                                                                                                                                                                                                                                                                                                                                                                                                                                                                                          |
| Manuscript ID                   | bmjopen-2020-039983.R1                                                                                                                                                                                                                                                                                                                                                                                                                                                                                                                                                                                   |
| Article Type:                   | Protocol                                                                                                                                                                                                                                                                                                                                                                                                                                                                                                                                                                                                 |
| Date Submitted by the Author:   | 20-May-2020                                                                                                                                                                                                                                                                                                                                                                                                                                                                                                                                                                                              |
| Complete List of Authors:       | Wheeler, Amanda; Griffith Health Institute, Griffith University, Menzies Health Institute; University of Auckland, Faculty of Health and Medical Sciences<br>O'Reilly, Claire L.; Univ Sydney, Sydney Pharmacy School, Faculty of Medicine and Health; The University of Sydney<br>El-Den, Sarira; University of Sydney, Pharmacy<br>Byrnes, Joshua; Griffith University, Centre for Applied Health Economics<br>Ware, Robert; Griffith University, Menzies Health Institute Queensland<br>McMillan, Sara; Menzies Health Institute Queensland, Griffith University, School of Pharmacy and Pharmacology |
| <b>Primary Subject Heading</b>: | Mental health                                                                                                                                                                                                                                                                                                                                                                                                                                                                                                                                                                                            |
| Secondary Subject Heading:      | Mental health, Pharmacology and therapeutics                                                                                                                                                                                                                                                                                                                                                                                                                                                                                                                                                             |
| Keywords:                       | MENTAL HEALTH, EDUCATION & TRAINING (see Medical Education & Training), PUBLIC HEALTH, Protocols & guidelines < HEALTH SERVICES ADMINISTRATION & MANAGEMENT                                                                                                                                                                                                                                                                                                                                                                                                                                              |
|                                 |                                                                                                                                                                                                                                                                                                                                                                                                                                                                                                                                                                                                          |

SCHOLARONE™  
Manuscripts

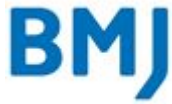

I, the Submitting Author has the right to grant and does grant on behalf of all authors of the Work (as defined in the below author licence), an exclusive licence and/or a non-exclusive licence for contributions from authors who are: i) UK Crown employees; ii) where BMJ has agreed a CC-BY licence shall apply, and/or iii) in accordance with the terms applicable for US Federal Government officers or employees acting as part of their official duties; on a worldwide, perpetual, irrevocable, royalty-free basis to BMJ Publishing Group Ltd ("BMJ") its licensees and where the relevant Journal is co-owned by BMJ to the co-owners of the Journal, to publish the Work in this journal and any other BMJ products and to exploit all rights, as set out in our [licence](#).

The Submitting Author accepts and understands that any supply made under these terms is made by BMJ to the Submitting Author unless you are acting as an employee on behalf of your employer or a postgraduate student of an affiliated institution which is paying any applicable article publishing charge ("APC") for Open Access articles. Where the Submitting Author wishes to make the Work available on an Open Access basis (and intends to pay the relevant APC), the terms of reuse of such Open Access shall be governed by a Creative Commons licence – details of these licences and which [Creative Commons](#) licence will apply to this Work are set out in our licence referred to above.

Other than as permitted in any relevant BMJ Author's Self Archiving Policies, I confirm this Work has not been accepted for publication elsewhere, is not being considered for publication elsewhere and does not duplicate material already published. I confirm all authors consent to publication of this Work and authorise the granting of this licence.

1  
2  
3 **Title: Bridging the gap between physical and mental illness in community pharmacy**  
4  
5 **(PharMIbridge): protocol for an Australian cluster randomised controlled trial**  
6  
7

8  
9 Amanda J Wheeler<sup>1,2</sup>, Claire L O'Reilly<sup>3</sup> (co-primary authors)

10  
11 Sarira El-Den<sup>3</sup>

12  
13 Joshua Byrnes<sup>1</sup>

14  
15 Robert S Ware<sup>1</sup>

16  
17 Sara S McMillan<sup>1,4</sup>

18  
19  
20  
21  
22  
23 <sup>1</sup> Menzies Health Institute Queensland, Griffith University, Brisbane, Queensland, Australia

24  
25 <sup>2</sup> Faculty of Medical and Health Sciences, Auckland University, Auckland, New Zealand

26  
27 <sup>3</sup> Sydney Pharmacy School, Faculty of Medicine and Health, The University of Sydney,  
28  
29 Sydney, NSW, Australia

30  
31  
32 <sup>4</sup> School of Pharmacy and Pharmacology, Griffith University, Gold Coast, Qld, Australia

33  
34  
35  
36  
37 \*Corresponding author

38  
39 Professor Amanda J Wheeler

40  
41 Menzies Health Institute Queensland, Griffith University, Nathan campus, Brisbane 4111,  
42  
43 Australia.

44  
45 +61 7 33821088

46  
47 Email: [a.wheeler@griffith.edu.au](mailto:a.wheeler@griffith.edu.au)

48  
49  
50 **Word count:** 7145 without abstracts, references, tables, figures

51  
52  
53 **Keywords:** mental health, severe and persistent mental health, community pharmacy,  
54  
55 physical health, medication adherence  
56  
57  
58  
59  
60

## ABSTRACT

**Introduction** There is a significant life expectancy gap attributable to physical comorbidities for people living with severe and persistent mental illness (SPMI) compared to the general population. Medications are a major treatment for SPMI management and physical illnesses, hence pharmacists are well-positioned to support mental healthcare and comorbidities. The RCT aim is to evaluate effectiveness of an individualised, pharmacist-led, support service for people experiencing SPMI focusing on medication adherence and physical comorbidity management, compared to standard care (a medication-management service; MedsCheck).

**Methods and analysis** *PharMIbridge* is a cluster RCT, whereby community pharmacies in four Australian regions will be randomised (1:1 ratio), to either Intervention Group (IG) or Comparator Group (CG). All IG and CG pharmacy staff will receive Blended-Mental Health First Aid training. Additionally, IG pharmacists will receive further training on medication adherence, goal setting, motivational interviewing, managing physical health concerns and complex issues relating to psychotropic medication. CG pharmacists will not receive additional training, and will provide standard care (MedsCheck). The primary outcome will be change in participants medication adherence for psychotropic medication over 6-months. Using mixed-effects logistic regression model and a cluster size of 48 pharmacies, a total of 190 participants will need to be recruited to each arm to find a statistically significant difference in medication adherence. Secondary outcomes will be changes in factors associated with cardiometabolic risk and quality of life, emphasising physical and psychological wellbeing; medication-related problems; adherence to other prescribed medication; pharmacists knowledge, confidence and ability to support people experiencing SPMI; and effects on healthcare utilisation. A within RCT-based economic evaluation comparing the intervention with standard care will be undertaken.



**Ethics and dissemination** The protocol and pharmacist training program received Griffith University Human Research Ethics Committee approval (HREC/2019/473 and HREC/2019/493 respectively). Results will be published in peer-reviewed journals and available at Sixth Community Pharmacy Agreement website (<http://6cpa.com.au/about-6cpa/>).

**Trial Registration Number:** ANZCTR12620000577910

### Strengths and limitations of this study

- The *PharMIbridge* RCT builds on previous Australian research to test the effectiveness of a pharmacist-led medication support service for consumers living with SPMI, with an additional focus on the management of physical comorbidities which are highly prevalent in this population.
- A multi-disciplinary approach will encourage participating pharmacies to develop and maintain working relationships with local GP clinics, medical centres, mental health care teams, and other physical health/exercise centres and practitioners (e.g. gyms) beyond the life of the RCT.
- Routinely collected pharmacy dispensing and Pharmaceutical Benefits Scheme (PBS) data will be used, alongside self-reported measurements, to evaluate medication adherence, which is the primary outcome measure.
- While a key focus of this RCT is exploring the impact of the *PharMIbridge* intervention on the physical wellbeing and overall health of people living with SPMI, the follow-up time is insufficient to use these and related outcomes as primary outcome measures.
- It is not possible for pharmacy staff or consumer participants to be blind to service allocation, due to the nature of the intervention.

## BACKGROUND AND RATIONALE

Community pharmacists are highly trusted and essential members of the primary healthcare team, playing a vital role through medication supply and information provision. Given the accessibility of community pharmacies, pharmacists are in an ideal position to adopt a triage-style role, signposting to other health care professionals and services. There is an emerging role, and growing need, for community pharmacists to support and manage mental illnesses. Research has demonstrated that pharmacists are capable of identifying consumers at risk of depression and referring appropriately for diagnosis and therapy,<sup>1-3</sup> managing psychotropic (e.g. antipsychotic and mood stabiliser) medication-related problems (MRPs),<sup>4-7</sup> providing antidepressant adherence support, and working within multidisciplinary mental health care teams.<sup>8-10</sup>

However, evidence also suggests that health care professionals, including pharmacists, are not exempt from holding stigmatising attitudes and behaviours towards mental health consumers;<sup>11 12</sup> pharmacists with more marked stigmatising attitudes were reported to be less willing to provide professional services to people with severe and persistent mental illness (SPMI)\*.<sup>14</sup> Lack of training in mental health or the opportunity to acquire the necessary skills and confidence in working with mental health consumers, have been cited as barriers to providing appropriate and timely care for this population.<sup>15</sup> Hence, the urgent need to develop a training program that addresses pharmacists' mental health knowledge gaps in anticipation of improving attitudes towards, and confidence in, providing care for people living with SPMI. This is particularly important in the Australian context given that 61.5% of people who experience psychosis, do so on multiple occasions, with partial or complete remission of symptoms between episodes.<sup>16</sup> Also of relevance is that a substantial proportion of Australians

1  
2  
3 using psychotropic medications access health care services in community settings, with 39-  
4 million mental health-related prescriptions dispensed in Australia in 2018-19.<sup>17</sup>  
5  
6

7  
8 Of significant concern is that Australians living with SPMI also experience poor physical  
9 health; they are five times more likely to smoke, six times more likely to die from  
10 cardiovascular disease and four times more likely to die from respiratory disease than the  
11 general population, leading to a 14-23 year gap in life expectancy.<sup>18</sup> These issues are often  
12 overlooked and/or dismissed by health care professionals and policy makers.<sup>19</sup> For example, a  
13 study by Morant et al.<sup>20</sup> in the United Kingdom found that the physical health concerns of  
14 antipsychotic users were not addressed by prescribing psychiatrists. Decisive action is needed  
15 to engage both relevant health practitioner groups and people living with SPMI with respect to  
16 physical health management.<sup>21</sup>  
17  
18  
19  
20  
21  
22  
23  
24  
25  
26  
27

28  
29 The acceptability of medications by people living with SPMI is also problematic and  
30 adherence is poor.<sup>22</sup> Reasons include, but are not limited to, experiencing (or the risk of  
31 experiencing) unwanted side effects, reluctance to rely on medication, and forgetfulness.<sup>22</sup> Poor  
32 adherence with antipsychotics is a key reason for relapse in psychosis; even missing a few days  
33 of treatment substantially increases this risk.<sup>23</sup> However, a good therapeutic relationship with  
34 attending health practitioners is linked to better medication adherence, fewer hospital  
35 admissions and a reduction in self-harm in people experiencing psychosis.<sup>24</sup> In this respect,  
36 pharmacist-led medication reviews for mental health consumers have shown promising  
37 results,<sup>7 25</sup> and given the associated concerns with drug-drug interactions, are particularly  
38 relevant for those living with SPMI using psychotropic medications.  
39  
40  
41  
42  
43  
44  
45  
46  
47  
48  
49  
50  
51  
52  
53

#### 54 **Evidence gap**

55  
56 Overall, there is relatively limited research on improving outcomes for consumers living with  
57 SPMI in the primary care setting (including community pharmacy). Whilst research exploring  
58  
59  
60

1  
2  
3 the impact of medication reviews on psychotropic prescribing within residential aged care  
4 settings has been conducted,<sup>26</sup> few studies have involved participants using psychotropic  
5 medications living in the community,<sup>27 28</sup> particularly those experiencing SPMI.<sup>29</sup> While  
6  
7  
8  
9  
10 Australian pharmacists can provide a medication review service in the form of a MedsCheck<sup>†</sup>  
11  
12 within the community pharmacy setting, research exploring the impact of this service on  
13  
14 medication adherence is limited.<sup>30-33</sup>  
15  
16

17 To our knowledge, research exploring the impact of a community pharmacist-delivered  
18 medication or health-related service specifically for people living with SPMI is scarce. A  
19 Canadian study demonstrated that pharmacy staff supported mental health consumers by  
20 providing follow-up care which focused on medication management and improving health  
21 service navigation and most study participants were using multiple psychotropic medications,  
22 few were living with SPMI (n=36; 17.9%).<sup>34 35</sup> Additionally, results from an Australian  
23 community-based, pharmacist-led medication support service for participants living with  
24 depression and anxiety were positive with significant improvements in relation to participants  
25 illness perceptions, medication satisfaction and medication adherence.<sup>6</sup> Our proposed  
26  
27  
28  
29  
30  
31  
32  
33  
34  
35  
36  
37  
38  
39  
40  
41  
42  
43  
44  
45  
46  
47  
48  
49  
50  
51  
52  
53  
54  
55  
56  
57  
58  
59  
60  
Randomised Controlled Trial (RCT) builds and expands on this evidence to test the  
effectiveness of a person-centred, goal-oriented, and flexible, pharmacist-led support service  
for people living with SPMI, with a specific focus on improving medication adherence and  
managing physical comorbidities. For the purpose of this RCT, SPMI refers to any mental  
illness that has a continuous and significant effect on a person's daily life, and includes (but is  
not limited to) the following: schizophrenia and other psychotic disorders, severe and recurrent  
depression, and bipolar disorder.

---

<sup>†</sup>A MedsCheck is an Australian remunerated service which involves a community pharmacist reviewing a person's medication, identifying any medication-related problems (MRPs), and providing related medication information. Australian residents eligible for a MedsCheck service include consumers who are at a higher risk of MRPs, such as those using more than five prescription medicines.<sup>30</sup>

For peer review only - <http://bmjopen.bmj.com/site/about/guidelines.xhtml>

## Study objectives

The aim of this RCT is to evaluate the effectiveness of “Bridging the Gap between Physical and Mental Illness in Community Pharmacy (*PharMIbridge*)”; an intervention comprising an individualised, pharmacist-led, support service for people living with SPMI, compared to standard care involving a one-off medication management service (MedsCheck). The primary objective is to test the impact of the *PharMIbridge* intervention (Intervention Group; IG) on psychotropic medication adherence. It is hypothesised that the *PharMIbridge* intervention will demonstrate a 20% increase in adherence at six-months compared with standard care (Comparator Group; CG). Overall, the objectives of the *PharMIbridge* RCT are to assess changes in:

- medication adherence (for psychotropic and other prescribed medication);
- health outcomes including quality of life, physical health and psychological wellbeing;
- community pharmacists’ confidence, knowledge and ability to address the medication-related and physical health care needs of people living with SPMI; and,
- health care service acceptability, utilisation and cost-effectiveness

The findings will be used to inform a more widespread implementation of person-centred service models for people living with SPMI within the primary healthcare sector.

## METHODS

Using a cluster RCT design, community pharmacies will be randomised to deliver either:

- i) the *PharMIbridge* intervention; or,
- ii) standard care involving a one-off MedsCheck service.

Figure 1 provides an overview of the research design, which involves a partnership between two University institutions (Griffith University and The University of Sydney) and

1  
2  
3 two professional pharmacy organisations (The Pharmacy Guild of Australia and The  
4 Pharmaceutical Society of Australia). Genuine engagement throughout the entire RCT with  
5 individuals with lived experiences of SPMI is critical to success. Given that those living with  
6 SPMI require a multifaceted approach to meet their mental and physical health care needs, a  
7 multidisciplinary team is also a key component of the *PharMIbridge* RCT. An Expert Panel  
8 will be formed, with invitations extended to consumer representatives living with SPMI, and  
9 representatives from key organisations such as Mental Health Australia, National Mental  
10 Health Consumer and Carer Forum, Sane Australia, the Royal Australian and New Zealand  
11 College of Psychiatrists (RANZCP), and the Royal Australian College of General Practitioners  
12 (RACGP). The Expert Panel will provide the research team with guidance on the  
13 implementation of the RCT, including advice on consumer and healthcare professional  
14 engagement, training materials and other resources, and research translation. The research team  
15 will work with local Primary Health Networks (PHNs)<sup>‡</sup> across RCT sites to recruit eligible  
16 community pharmacies into the *PharMIbridge* RCT.  
17  
18  
19  
20  
21  
22  
23  
24  
25  
26  
27  
28  
29  
30  
31  
32  
33  
34  
35  
36  
37  
38  
39  
40  
41  
42  
43  
44  
45  
46  
47  
48  
49  
50  
51  
52  
53  
54  
55  
56  
57  
58  
59  
60

---

<sup>‡</sup> PHNs are independent organisations funded by the Australian Government. They work closely with local hospital networks and each PHN is overseen by a board of medical professionals. PHNs conduct assessments of the health needs of their region to identify groups of people who need more resources, programs and services. The information helps PHNs to tailor health services to meet the community's needs (<https://www.healthdirect.gov.au/primary-health-networks-phns>). 8

1  
2  
3  
4  
5  
6  
7  
8  
9  
10  
11  
12  
13  
14  
15  
16  
17  
18  
19  
20  
21  
22  
23  
24  
25  
26  
27  
28  
29  
30  
31  
32  
33  
34  
35  
36  
37  
38  
39  
40  
41  
42  
43  
44  
45  
46  
47  
48  
49  
50  
51  
52  
53  
54  
55  
56  
57  
58  
59  
60

*Insert Figure 1 about here*

## Study setting and population

This RCT will be conducted in four Australian regions including urban, rural and remote. Two regions in Western Australia (WA) (i.e. South-West and Metropolitan/South Perth), one region in New South Wales (NSW) (i.e. Hunter New England) and the Australian Capital Territory (ACT) will be included. RCT sites will include a mix of community pharmacies within varied PhARIA (Pharmacy Accessibility/Remoteness Index of Australia classification) locations,<sup>36</sup> while also ensuring pharmacies ability to meet the eligibility criteria and recruit the required number of consumer participants. For example, the South-West region of WA includes a mix of regional and remote areas and has a high need for mental health services, with only 6% of the affected population reported to be receiving appropriate care for their mental health problems.<sup>37</sup>

### Community pharmacies

Community pharmacies located within the selected RCT regions will be eligible if they have:

- i) approval to dispense pharmaceutical benefits as part of the Pharmaceutical Benefits Scheme (PBS);
- ii) accreditation for Quality Care Pharmacy standards (quality assurance program for community pharmacies);
- iii) a clientele demographic that includes people with SPMI;
- iv) routinely provided MedsCheck as an established professional service;
- v) guaranteed that the *PharMIbridge* intervention will be carried out by a registered pharmacist who has completed the training;
- vi) a private room/area for confidential conversations and assessments;
- vii) pharmacy owner/manager consent to participate; and,

- 1  
2  
3       viii) an established working relationship with local GP clinics or centres, mental health  
4               care teams, and/or are already engaged with mental health promotion.  
5  
6

7  
8       Pharmacies will be randomised into the IG or CG after stratification by region and  
9  
10       geographic location (urban/rural/remote). Within each stratum, pharmacies will be randomly  
11  
12       allocated in a ratio of 1:1 to the IG or CG. Randomisation will occur after all pharmacies for  
13  
14       that RCT region have been recruited. The number of full-time equivalent employees will be  
15  
16       ranked within each stratum, and pharmacies will be formed into pairs. A list of computer-  
17  
18       generated random numbers will be used to allocate either the PharMIbridge intervention (IG)  
19  
20       or MedsCheck service (CG) to the first of each pair; the second in each pair will be allocated  
21  
22       the alternative service. It is expected that 12 pharmacies will be located in urban, nine in  
23  
24       regional/rural and three in remote areas in each of the RCT arms.  
25  
26  
27  
28  
29

### 30 31       Consumer participants

32  
33       Trained pharmacy staff (CG and IG) will identify ten eligible consumers per pharmacy for an  
34  
35       enrolment period of six months. Consumers can also self-identify into the RCT via research  
36  
37       promotion or be referred directly from a treating health care professional, non-government  
38  
39       organisation or mental health service. Eligible consumers need to have capacity to provide  
40  
41       informed consent, as assessed by trained pharmacy staff using capacity assessment principles  
42  
43       for RCT participation, and consent to pharmacists contacting their treating healthcare team  
44  
45       (e.g. GP, case manager, psychiatrist).<sup>38</sup> Furthermore, eligible consumers need to provide  
46  
47       consent to allow the researchers to access their associated Medicare Benefits Schedule (MBS),  
48  
49       PBS, hospitalisation and emergency department records for a 12-month pre- and 6-month post-  
50  
51       trial period. Specifically, eligibility will require participants to:  
52  
53

- 54       i)       be 16 years and over and residing in the community;  
55  
56  
57  
58  
59  
60



- 1  
2  
3 ii) be using at least one antipsychotic or mood stabiliser for at least six-months  
4 continuously, for the treatment of SPMI; and,  
5  
6  
7  
8 iii) have a complex medication need (e.g. adherence concerns) or unmanaged physical  
9 health problems.  
10  
11

12 Although participants need 6-months of dispensing data for a psychotropic medicine  
13 prior to RCT enrolment, medication changes during this time are reasonable, as well as the use  
14 of other medication(s) for their mental and physical health. Exclusion criteria include:  
15  
16  
17

- 18  
19 i) aged under 16 years;  
20  
21 ii) unstable mental health symptoms or deemed as an unsuitable RCT participant by  
22 their treating health care professionals, pharmacist or carer;  
23  
24 iii) ‘when required’ or inconsistent use of antipsychotic and/or mood stabiliser  
25 medication(s);  
26  
27 iv) using an antipsychotic or mood stabiliser medication for treatment of an illness not  
28 related to SPMI (e.g. off-label use of quetiapine for sleep or anxiety);  
29  
30 v) not consenting to participate to the researchers contacting their treating healthcare  
31 practitioner, or to accessing PBS, MBS and hospitalisation data; and,  
32  
33 vi) receiving a MedsCheck or Home Medicines Review (HMR)<sup>§</sup> within 12-months  
34 prior to RCT enrolment.  
35  
36  
37  
38  
39  
40  
41  
42  
43  
44  
45  
46  
47  
48  
49  
50  
51  
52  
53  
54  
55  
56  
57  
58  
59  
60

### ***PharMIbridge* intervention**

An overview of the proposed *PharMIbridge* RCT is illustrated in Figure 2. The intervention will be undertaken by trained community pharmacists randomised into the IG. In addition to the standard care available in all community pharmacies, the intervention will provide IG consumer participants with an in-depth service that is goal-oriented, flexible and individualised. Goals will be guided by an in-depth medication review, various self-assessment questionnaires and tools (documented during the Initial Health Review consultation) and be tailored to meet individual needs. There will be a specific focus on overcoming barriers to medication adherence and addressing physical health concerns (Table 1). RCT questionnaires and tools are reported under *Study outcomes*.

*Insert Figure 2 about here*

IG consumer participants will receive individualised care and support over a six month period (Figure 2) to promote medication adherence, optimise the management of their mental illness, and encourage lifestyle and pharmacological strategies to improve physical health, with a particular focus on reducing cardiometabolic risk. During the initial consultation (Figure 2), IG pharmacists will utilise motivational interviewing techniques to determine participants' key concerns regarding their medication, adherence, and physical and psychological wellbeing. Upon identification of three to five key issues, IG pharmacists will: i) engage participants in a goal-setting discussion and explore strategies to achieve these goals; ii) complete a signed agreement of the support plan; and iii) confirm participant's consent to discuss this plan with their nominated healthcare professional (e.g. GP, psychiatrist, case manager, etc.). The pharmacist will continue to work with the participant over the 6-month intervention period towards goal achievement, with follow-ups as identified with the participant and in their preferred modality (face-to-face, email, telephone, text messaging). At a minimum, it is expected that participants will have at least three face-to-face consultations with IG pharmacists (including the Initial and Final Health Review consultations). However, additional

1  
2  
3 consultations can occur during the RCT period and participants can obtain pharmacist advice at any  
4  
5 time, as needed. At the final 6-month follow-up the IG pharmacist and participant will complete the  
6  
7 Final Health Review.  
8  
9

10 IG pharmacists will be required to keep accurate records of interactions and outcomes using a  
11  
12 cloud-based software platform (GuildCare NG™), which is currently used in many community  
13  
14 pharmacies when delivering professional services. Support plans, medication-related reports and  
15  
16 follow-up consultations, recorded as part of the *PharMIbridge* intervention, will be accessible to a  
17  
18 participant's nominated health care professional for their direct input, through GuildCare NG™. IG  
19  
20 pharmacists will work collaboratively with participants' nominated healthcare practitioner(s),  
21  
22 updating them regularly via the Guildcare platform and usual communication mechanisms  
23  
24 especially when there are any concerns needing rapid intervention.  
25  
26  
27  
28  
29

### 30 31 **Comparator arm**

32  
33 Participants recruited by a CG pharmacy will receive a standard MedsCheck service after enrolment  
34  
35 and then continue to receive the usual care that the community pharmacy provides. All requirements  
36  
37 outlined for the MedsCheck service will be followed, noting that some participants may not have  
38  
39 otherwise been eligible for this government funded service (e.g. not taking five or more medicines).  
40  
41 Pharmacists will schedule a follow-up consultation to complete final RCT outcome assessments  
42  
43 with participants six-months following recruitment into the RCT.  
44  
45  
46  
47  
48

### 49 50 **Training**

51  
52 Previous evidence-based programs will inform the development of the education and training  
53  
54 materials for the RCT. This includes the training modules used in the Australian mental health  
55  
56 feasibility study,<sup>39</sup> as well as research into pharmacists' knowledge and mental health literacy,<sup>40</sup>  
57  
58  
59  
60

1  
2  
3 mental health stigma,<sup>14 41</sup> Mental Health First Aid<sup>#</sup> (MHFA),<sup>42</sup> simulated patient assessments,<sup>43 44</sup>  
4  
5 consumer-led education,<sup>45</sup> consumer perspectives and consumer/carer trainers.<sup>46-48</sup> A training  
6  
7 working group will oversee and develop the training content required to deliver the intervention.  
8  
9  
10 This group will comprise representation from content experts, consumer representatives and the  
11  
12 partner organisations. Face and content validity of all newly developed training material will be  
13  
14 ensured through collaborations with mental health consumers, the multidisciplinary Expert Panel  
15  
16 and professional pharmacy and mental health organisations. Training will be delivered in such a  
17  
18 way that it facilitates a naturalistic approach to enable pharmacists to use their discretion to  
19  
20 individually tailor the *PharMIbridge* intervention for each participant.  
21  
22

23  
24 Training will involve a one or two-day program depending on RCT arm allocation, with IG  
25  
26 pharmacists attending both training days:  
27

- 28 • First training day

29  
30 Pharmacy staff in both IG and CG arms will complete Blended MHFA for Pharmacy (B-MHFAP)<sup>≠</sup>  
31  
32 training, involving a six-hour online module completed prior to attending the half-day face-to-face  
33  
34 training component.<sup>49</sup> It will be delivered by an accredited instructor and is certified for 24  
35  
36 Continuing Professional Development points. Training on research processes, including participant  
37  
38 recruitment and consent, service delivery, and use of GuildCare NG<sup>TM</sup> as a platform for all data  
39  
40 collection, will be delivered to both IG and CG pharmacy staff in separate groups to ensure they are  
41  
42 ‘research-ready.’ Established guidelines for providing MedsCheck services will be utilised by CG  
43  
44 pharmacists.<sup>50</sup> A standard operating procedure (SOP) will be provided to all pharmacists outlining  
45  
46 the various steps in the research process.  
47  
48  
49

50  
51 The remainder of the first day of training for IG pharmacy staff will involve the use of  
52  
53 simulated patient role-plays with the accredited B-MHFAP instructors and mental health consumers  
54  
55  
56  
57  
58

---

59  
60 <sup>≠</sup> The blended MHFA in the Pharmacy (B-MHFAP) course uses case-studies, videos and resources tailored to pharmacy staff learning needs and is completed in a blended format, combining eLearning and a follow-up 4-hour face-to-face session.  
<https://mhfa.com.au/courses/public/types/blendedpharmacy>

1  
2  
3 to encourage staff to practice their newly acquired MHFA skills.<sup>43 44 51</sup> Simulated patient role-plays  
4  
5 with on-the-spot performance feedback will allow pharmacy staff to demonstrate their newly  
6  
7 acquired skills in a safe, authentic and supportive learning environment. Research has highlighted  
8  
9 the importance of behavioural assessments post-training due to the potential for over, and/or under,  
10  
11 estimating skills through self-reported measures.<sup>43</sup> Research has also indicated that both participants  
12  
13 and observers of simulated B-MHFAP role-plays report higher self-reported confidence than those  
14  
15 who receive MHFA only, and that maintain improvements in confidence post-training.<sup>44</sup>  
16  
17

- 18  
19 • Second training day

20  
21 IG pharmacists will be required to complete four interactive training modules on key issues  
22  
23 associated with psychotropic medication use and physical health, and how to address these issues  
24  
25 for people living with SPMI, using evidence-based tools. The modules will be developed by the  
26  
27 training working group and led by experts (including psychiatrists, psychopharmacologists, and  
28  
29 consumer consultants) and will include the following topics:  
30  
31

- 32  
33 1. *Complex issues relating to psychotropic medication (adherence and side effects).* This module  
34  
35 will discuss the role of psychotropic medications, including an exploration of the barriers and  
36  
37 enablers to adherence, and the consequences of poor adherence. It will also discuss complex  
38  
39 issues relating to psychotropic medication use, such as weight gain and diabetes.  
40  
41
- 42  
43 2. *Physical health issues for people living with SPMI.* This module will explore the evidence  
44  
45 regarding the importance of physical health care and exercise for people living with SPMI. It  
46  
47 will also include information on active lifestyles, cardiometabolic risk, tobacco use and  
48  
49 resources.  
50  
51
- 52  
53 3. *Evidence-based strategies to improve medication adherence and physical health care.* This  
54  
55 module will equip pharmacists with evidence-based strategies including guidance on  
56  
57 addressing cardiovascular risk factors, and sensitive issues such as weight management,  
58  
59 smoking cessation, dental health, and medication adherence.  
60

- 1  
2  
3 4. *Communication, motivational interviewing and goal setting.* This module will help pharmacists  
4 develop appropriate and person-centred communication skills and strategies to work with  
5 participants to set, and reach, their mental and physical health goals.  
6  
7  
8  
9

10 Case studies and role-play activities will be integrated throughout the modules to provide IG  
11 pharmacists with opportunities to practice and apply their newly acquired skills, including the use  
12 of research tools and questionnaires. Prior to the first workshop commencing specific aspects of the  
13 training will be video-recorded to consistency in delivering the intervention to all workshops. The  
14 training modules will be made available online for IG pharmacists to access as needed for reference  
15 purposes.  
16  
17  
18  
19  
20  
21  
22  
23

24 The continued wellbeing of participants living with SPMI is a key aspect of the training.  
25 Information on mental health and crisis support numbers and websites will be part of the resources  
26 provided, e.g. Lifeline, BeyondBlue. Furthermore, communication between pharmacists and the  
27 participant's treating team will be ongoing throughout the RCT, thus helping to ensure that any  
28 deterioration in health status, or concerns about wellbeing, will be immediately recognised and  
29 addressed.  
30  
31  
32  
33  
34  
35  
36  
37

38 Recruited community pharmacies will be required to send at least two pharmacists (one of  
39 whom can be an intern pharmacist<sup>o</sup> working under the supervision of a registered pharmacist) to  
40 complete the *PharMIbridge* training components. All pharmacies will be encouraged to invite  
41 additional pharmacy support staff to complete and attend the B-MHFAP component and  
42 information session on research processes, to support pharmacists in delivering the intervention/  
43 comparator and establish 'Mental Health Friendly Pharmacies'. Ultimately, trained registered  
44 pharmacists will take responsibility for delivering the *PharMIbridge* intervention. For example,  
45 while only the pharmacist can be involved in addressing MRPs, a pharmacy support staff member  
46  
47  
48  
49  
50  
51  
52  
53  
54  
55  
56  
57  
58  
59  
60

---

1  
2  
3 with well-established consumer relationships could assist with promotion, be involved with  
4 identifying eligible participants, making follow-up appointments, or sending reminders.  
5  
6

7  
8 A pilot workshop of the non-B-MHFAP training components will involve a convenience  
9 sample of pharmacy students, intern and registered pharmacists, and all RCT trainers/mentors.  
10  
11 Feedback will be sought through pre- and post-training questionnaires and focus group discussions  
12 at the conclusion of pilot training. This feedback will help identify whether modifications to the  
13 training are required prior to its delivery as part of the RCT.  
14  
15  
16  
17  
18  
19  
20

### 21 **Training mentors**

22  
23 The IG training components will be delivered by a local pharmacist and consumer mentor  
24 partnership in each RCT region who will also provide ongoing support for IG pharmacy staff  
25 throughout the RCT. The combination of a pharmacist educator with experience in community  
26 pharmacy practice and a consumer educator with lived experience of mental illness working as a  
27 mentor pair has been shown to facilitate implementation of a mental health support service for  
28 consumers with depression and anxiety.<sup>46</sup> The mentor pair will personally visit the IG pharmacies  
29 in their RCT region on a minimum of two occasions during the intervention period. In addition to  
30 these visits, mentors will provide regular support through phone calls, emails and other modalities,  
31 as required. Moreover, the training team will provide two refresher webinars in each RCT region;  
32 these will be led by the two mentors. Webinars will focus on problem-solving discussions and co-  
33 learning perhaps using examples of ‘what has worked well’/‘not so well’ to stimulate conversation.  
34 Refresher content will be based on two additional, pre-recorded, case-scenarios allowing  
35 pharmacists to revise the skills they have been applying in practice.  
36  
37  
38  
39  
40  
41  
42  
43  
44  
45  
46  
47  
48  
49  
50  
51  
52  
53  
54  
55

### 56 **Study outcomes**

#### 57 **Primary outcome**

1  
2  
3 The primary outcome is the difference in medication adherence rates between the IG and CG at  
4 RCT conclusion (six-months). Medication adherence will be identified using both routinely  
5 collected data (pharmacy dispensing and PBS) and self-reported measurements of adherence; the  
6 Reported Adherence to Medicine (RAM)<sup>52</sup> scale which has been validated for use among people  
7 with psychosis, schizoaffective disorder and schizophrenia.<sup>53</sup> PBS and pharmacy dispensing data  
8 will be used to confirm self-reported data by calculating: i) the Medicine Possession Ratio (MPR),  
9 which refers to the proportion of days that a consumer is in possession of their medicine within a  
10 defined period; and ii) Medicine Persistence, which refers to a specified time-period when there has  
11 been a delay in medicine re-fill.<sup>54</sup> A pilot of the selected tools will be undertaken in the set-up stage  
12 of the *PharMIbridge* RCT (Figure 1 and Table 1) to ensure that they are practical, valid and feasible  
13 to use within the RCT time-frame.  
14  
15  
16  
17  
18  
19  
20  
21  
22  
23  
24  
25  
26  
27  
28  
29  
30

## 31 Secondary outcomes

### 32 *Health outcomes*

33 Clinical measures including weight, body mass index, abdominal girth and blood pressure,<sup>55</sup> will  
34 be collected at two time-points; when participants complete the baseline and 6-month follow-up  
35 questionnaires. Pharmacists will collect these measures in the pharmacy and/or from patient/health  
36 care records. Additionally, participants will be asked (at baseline and 6-month follow-up) if, in the  
37 last 12 months, they have had a risk assessment for cardiovascular disease and a glycated  
38 haemoglobin (HbA1c) blood test to assess for diabetes. Participants physical health will be  
39 evaluated using self-reported questionnaires, including the Physical Activity "Vital Sign" (PAVS)  
40 Questionnaire<sup>56</sup> and selected questions from the Australian Health Survey on Dietary Behaviour.<sup>57</sup>  
41 The Alcohol, Smoking and Substance Involvement Screening Test (ASSIST) will also be used to  
42 screen for substance use.<sup>58 59</sup>  
43  
44  
45  
46  
47  
48  
49  
50  
51  
52  
53  
54  
55  
56  
57  
58  
59  
60



1  
2  
3 Additional tools such as the My Medicines and Me Questionnaire (M3Q)<sup>60</sup> exploring  
4 psychotropic medication side-effects; the Simple Physical Activity Questionnaire (SIMPAQ)<sup>61 62</sup>  
5 which identifies time spent on physical activity; the Pittsburgh Sleep Quality Index (PSQI)<sup>63</sup>  
6 exploring sleep quality, the Fagerström Test for Nicotine Dependence<sup>64</sup> and the Brief Pain Inventory  
7 (BPI)<sup>65</sup> identifying pain-related concerns, will assist IG pharmacists with intervention delivery.<sup>65 66</sup>  
8 This combined information will inform the development of goals for IG consumer participants, with  
9 goal achievement reviewed at each follow-up, and at the final six-month, consultation using the  
10 Goal Attainment Scale (GAS).<sup>67</sup>  
11  
12  
13  
14  
15  
16  
17  
18  
19  
20

### 21 *Quality of life, medication experiences and illness beliefs*

22  
23 Difference in self-reported quality of life (e.g. Assessment of Quality of Life, AQoL-6D),<sup>68</sup>  
24 psychological wellbeing (Kessler Psychological Distress Scale, K-6), sleep problems (Insomnia  
25 Severity Index, ISI),<sup>69</sup> medication burden (Multimorbidity Treatment Burden Questionnaire,  
26 MTBQ),<sup>70</sup> attitudes (Drug Attitude Inventory 10, DAI-10),<sup>71 72</sup> illness beliefs (Brief Illness  
27 Perception Questionnaire, BIPQ),<sup>73</sup> and health care service utilisation (e.g. frequency of GP follow-  
28 up or referrals, pharmacist action/s, hospitalisation(s) and emergency department admissions) will  
29 be measured between and within RCT arms at baseline and at 6-months. An evaluation of the  
30 identification and number and type of MRPs (including side-effects), and adherence to other  
31 prescribed medication, will be undertaken at baseline and six-month follow-up.  
32  
33  
34  
35  
36  
37  
38  
39  
40  
41  
42  
43

44 It is anticipated that the *PharMIbridge* intervention will further optimise health care utilisation  
45 by increasing pharmacist communication and collaboration with other health practitioners and other  
46 support people involved in the participant's care. The RCT will involve increased use of  
47 MedsChecks by community pharmacists for this vulnerable population. Difference in Federal  
48 Government healthcare resource use (measured as the total of primary health care services,  
49 laboratory tests and medications; and MBS data) will be sought from the Australian Government  
50 Department of Human Services, with participant consent.  
51  
52  
53  
54  
55  
56  
57  
58  
59  
60

### *Pharmacy staff evaluation of training*

Evaluation of the B-MHFAP training will be undertaken as a standard component of this accredited course.<sup>74</sup> An evaluation of the *PharMIbridge* training programme in terms of its effectiveness (in comparison to B-MHFA alone) to reduce stigma and build the required skills for pharmacists to work with people living with SPMI will involve pre- and post-training questionnaires, which will be repeated at RCT conclusion. The questionnaires will collect both qualitative and quantitative data including items adapted from validated scales such as the Social Distance Scale,<sup>75</sup> the Mental Illness Attitude Questionnaire,<sup>76</sup> and the Metabolic-Barriers, Attitudes, Confidence, and Knowledge Questionnaire (M-BACK).<sup>77</sup> Additional questions will specifically focus on pharmacist confidence in providing MHFA,<sup>44</sup> willingness to provide services for mental health consumers<sup>14 78 79</sup> and barriers and incentives to working with people living with SPMI.<sup>6</sup>

### *PharMIbridge service evaluation*

A proportion of IG consumer participants and pharmacists will be invited to participate in a telephone interview at RCT conclusion to qualitatively explore the acceptability and impact of the *PharMIbridge* intervention. Up to five consumer participants from each RCT region will be invited for interviews (max=20) as well as one pharmacist from each pharmacy who participated in the RCT (max=24). The participant interview guide will explore topics including: i) medication adherence and current medications; ii) types of MRPs experienced and resolved; iii) health literacy in relation to psychotropic medicines; iv) changes in relationship between participants, pharmacists and other health care professionals; and, iv) satisfaction with the *PharMIbridge* intervention. An additional participant-reported experience measure will be developed and included at the end of the service delivery in the Final Health Review. A short online survey will also be developed to explore service acceptability for other health practitioners who interact with the intervention, and other pharmacy staff, e.g. pharmacy assistants.

## Data collection

The RCT data collection tools and processes will be piloted prior to use (Figure 1). Data will be collected from consumer participants, pharmacy staff and other health care professionals (Table 1).

Consumer participants will be required to consent to their MBS, PBS, hospitalisation and emergency department data being accessed by researchers for a period of 12-months prior to, and six-months after, enrolment in the RCT. The reason for collecting data about resource use up to 12-months prior to the RCT is to test for baseline differences which can then be adjusted for during analysis.

Participant data collected by pharmacists will be entered directly into purpose-built IG and CG research modules within GuildCare NG™. This cloud-based pharmacy software platform is used by the majority of community pharmacies in Australia for the delivery of professional service programs such as MedsCheck; it also links to dispensing systems. In the IG, nominated members of the participant's treating team (i.e. GP, psychiatrist, mental health case manager) will be provided with access to their individual consumer participant's research records to facilitate timely access to, and exchange of, shared information.

Participating community pharmacies will receive funding to support their research involvement, including an administration fee for training attendance, research administration and data management (ranging from \$3,700-\$10,712 depending on urban/rural/remote location), as well as a per-participant fee for initial and follow-up consultations, and for six-month data collection. IG pharmacies will be remunerated for the baseline data collection and Initial Health Review (75 minutes; \$167), follow-up consultations (Level 1: up to three consultations; \$66, or Level 2: greater than three consultations; \$133), and for the Final Health Review and follow-up data collection (30 minutes; \$167). Service fees for CG pharmacists include the MedsCheck consultation and baseline data collection (60 minutes; \$133) and the six-month follow-up data collection (30 mins; \$66). A

1  
2  
3 gift voucher valued at AUD\$30 will be offered to all consumer participants at the final, six-month  
4  
5 data collection point in recognition of their time for completing data collection processes that would  
6  
7 not normally be part of their health care.  
8  
9

### 10 11 12 **Sample size** 13

14  
15 Based on a recent study conducted in a similar population,<sup>6</sup> we assume the baseline rate of non-  
16  
17 adherence assessed using pharmacy dispensing data will be 56%. This outcome will be available  
18  
19 for all participants (unless actively withdrawn), regardless of treatment adherence. We assume the  
20  
21 percentage of non-adherent participants in the CG arm will drop to 51% (based on the results of  
22  
23 previous studies exploring adherence as an outcome of a MedsCheck service),<sup>30-33</sup> and the  
24  
25 percentage of non-adherent participants in the IG arm will drop to 35%.<sup>6</sup> With  $\alpha=0.05$ , the RCT  
26  
27 will have 80% power to find a statistically significant difference between RCT arms with 149  
28  
29 individuals recruited to each arm (without accounting for clustering).  
30  
31

32  
33 As this is a cluster-RCT we need to account for the non-independence of observations from  
34  
35 individual participants recruited from the same pharmacy. We assume a median number of 10  
36  
37 participants at each pharmacy, and conservatively assume the  $ICC=0.03$ , giving a design effect of  
38  
39 1.27. Consequently, a total of 190 participants will need to be recruited in each arm (380 in total).  
40  
41 To achieve this, 10 consumer participants will need to be enrolled from each of 38 pharmacies.  
42  
43 Assuming that 20% of pharmacies will withdraw from the RCT without enrolling any participants,  
44  
45 a total of 48 pharmacies will need to be recruited.  
46  
47  
48  
49

### 50 51 **Data analyses** 52

53  
54 Descriptive statistics will be used; mean (standard deviation) or median (25th-75th percentile) for  
55  
56 continuous data and frequency (percentage) for categorical data. We will compare the primary  
57  
58 outcome of percentage adherence between RCT arms using a mixed-effects logistic regression  
59  
60

1  
2  
3 model, with treatment arm entered as the fixed effect and pharmacy entered as a random effect, to  
4  
5 account for possible non-independence of observations from participants who attend the same  
6  
7 pharmacy. Results will be reported as odds ratios and 95% Wald-based confidence intervals.  
8  
9

10 For secondary analyses, interval data will be analysed using mixed-effects linear regression,  
11  
12 binary data using mixed-effects logistic regression, and count data using mixed-effects Poisson  
13  
14 regression models. In all cases, the likely non-independence of data from individuals enrolled  
15  
16 through the same pharmacy will be accounted for as random effects in the regression models.  
17  
18 Analyses will be based on the intention-to-treat principle, with participants analysed according to  
19  
20 the treatment they were allocated to receive. Data will be analysed using Stata statistical software  
21  
22 (StataCorp, College Station, TX, USA), with significance set at less than 0.05.  
23  
24  
25

26 Qualitative interviews will be audio-recorded (with participant consent), transcribed verbatim  
27  
28 and quality checked. Thematic analysis will be conducted by experienced qualitative researchers  
29  
30 within the research team. This process involves reading and re-reading transcripts to identify,  
31  
32 analyse and report patterns within the data, leading to the identification of similar codes across the  
33  
34 entire data set.<sup>80</sup> Initial codes are thereby sorted into themes and subthemes.<sup>80</sup>  
35  
36  
37  
38  
39

## 40 **Economic evaluation**

41  
42 We hypothesise that the provision of the *PharMIbridge* intervention will be cost-effective compared  
43  
44 to standard care from a health care sector perspective with regard to RCT-based costs and outcomes  
45  
46 (cost per additional participant adherent/cost per [proxy] health outcome). The base case analysis  
47  
48 will comprise the cost per additional 'adherent' participant for the IG compared with the CG and  
49  
50 reported as the incremental cost-effectiveness ratio (ICER). The outcome for the base case analysis  
51  
52 is the difference in the change in the proportion of 'adherent' participants from baseline to RCT  
53  
54 conclusion, between the IG and CG. Sub-group analyses will be conducted for the primary outcome  
55  
56 measure (adherence) based on participant characteristics. Regression analyses using 'adherence' as  
57  
58  
59  
60

1  
2  
3 the dependent variable will be performed to assess if the effect of the intervention varies by SPMI  
4  
5 diagnosis, age, gender, pharmacy location and number of other medications taken concurrently.  
6  
7 Any evidence of non-linearity will be adjusted for using appropriate transformations.  
8  
9

10 A cost per Quality Adjusted Life Year (QALY) gain will also be conducted based on health-  
11  
12 related Quality of Life data collected within the trial. QALYs will be estimated by applying  
13  
14 Australian utility weights and using the area under the curve approach. Difference in QALYs  
15  
16 between the IG and CG will be estimated using linear or non-linear regression methods depending  
17  
18 on the nature of the data. The analytical time-frame for the cost effectiveness analyses will be  
19  
20 limited to that of the follow-up period of the trial. This is the most conservative approach relative  
21  
22 to translation of the primary outcome measure, adherence, where there is likely to be heterogeneity  
23  
24 of medications and conditions.  
25  
26  
27

28 Costs will be considered from the health system perspective and include both the cost of  
29  
30 interventions and the cost consequences from potential changes in health care utilisation. The  
31  
32 difference in health resource use for all participants will be collected and analysed based on  
33  
34 administratively collected MBS, PBS and pharmacy dispensing data.  
35  
36  
37  
38  
39

#### 40 Included costs

41  
42 The difference in health resource use for all participants will be collected and analysed from their  
43  
44 MBS and PBS records six-months prior to, and during, enrolment in the RCT. Impact of seasonality  
45  
46 will also be assessed for the same 12-month period. The economic evaluation will quantify costs  
47  
48 associated with the *PharMIbridge* intervention at a participant level in the eligible population. The  
49  
50 costs measured in the economic evaluation should be equivalent to their ‘opportunity cost’, i.e.  
51  
52 assessed in terms of the monetary value of the benefits that are foregone because the resources are  
53  
54 not available for their best alternative use. The opportunity cost will be estimated from the market  
55  
56 costs of the resources consumed, whenever available. Costs from the RCT include, but will not be  
57  
58  
59  
60

1  
2  
3 limited to: i) the training of pharmacists to provide the *PharMIbridge* intervention; ii) the fee-for-  
4 service to pharmacists; and, iii) the clinical software adaption to facilitate the identification of ‘non-  
5 adherent’ participants and record interventions.  
6  
7  
8  
9

### 10 11 12 Cost data analysis 13

14 The source of any variation (if observed) in costs between intervention and comparator arms, as  
15 well as the cost ‘drivers’, will be investigated with a Generalised Linear Model (GLM) using a  
16 standard statistical software package (STATA). As cost data are not likely to be normally  
17 distributed, a gamma log-link function or similar will be used, with appropriate testing of the GLM  
18 specification using the modified Park test and link test. Full costing will be provided for the RCT.  
19 If certain costs are not included in the economic evaluation, any assumptions, and the effect of their  
20 exclusion, will be specified in the analysis.  
21  
22  
23  
24  
25  
26  
27  
28  
29

30 Costing of the *PharMIbridge* intervention will be undertaken as follows: i) identify  
31 administrative resources used in program management, with RCT-specific administrative resources  
32 separated from activities that would be included in a national roll-out of the program; ii) some  
33 resource use will be measured in natural units (for example, clinical staff time spent on delivering  
34 the *PharMIbridge* intervention) and will be valued in monetary units; iii) other resources can be  
35 directly valued (for example, incentive payments to staff and services); and, iv) if the *PharMIbridge*  
36 intervention delivery requires additional equipment (e.g. privacy screen), market costs will be  
37 estimated with amortisation applied over the useful life of the equipment.  
38  
39  
40  
41  
42  
43  
44  
45  
46  
47  
48  
49  
50

### 51 Sensitivity analysis 52

53 The uncertainty in effect sizes and costs will translate into a degree of uncertainty around the  
54 estimated ICER. This uncertainty will be explored using a system of seemingly unrelated regression  
55 equations. This has been chosen because it has been argued that such methods are generally robust  
56  
57  
58  
59  
60

1  
2  
3 to skewed data, and to allow for any correlation between costs and effects. The cost and adherence  
4  
5 (or QALY) regressions will be run simultaneously, including SPMI diagnosis, age, gender,  
6  
7 pharmacy location and number of other medications taken concurrently included (as covariates) to  
8  
9 explore potential sub-group differences with respect to adherence, costs or cost-effectiveness.  
10  
11 Additionally, in order to estimate the level of uncertainty associated with the decision as to whether  
12  
13 or not the intervention was cost-effective, we will use the non-parametric bootstrap technique (with  
14  
15 5,000 replications sampled with replacement) to estimate the probability that the intervention is  
16  
17 cost-effective over a range of willingness to pay per outcome (adherer / QALY) according to the  
18  
19 cost-effectiveness acceptability curve.  
20  
21  
22  
23  
24  
25

### 26 Financial appraisal

27  
28 Financial appraisal and full pathway costing will be undertaken as part of the *PharMIbridge* RCT.  
29  
30 Where assumptions for identification, measurement and valuation of economic costs differ to  
31  
32 financial costs, these differences will be specified. The cost to the health sector if the *PharMIbridge*  
33  
34 intervention was implemented nationally will be extrapolated over a five-year time frame.  
35  
36  
37  
38  
39

### 40 Patient and public involvement

41  
42 To provide maximum benefit to people with SPMI, health services need to be relevant, accessible  
43  
44 and responsive to their needs. The views of people with lived experience of a mental illness will be  
45  
46 paramount to the success of the *PharMIbridge* RCT, from their involvement in the development of  
47  
48 the RCT protocol as members of the research team, development and implementation of the  
49  
50 intervention with pharmacy staff as trainers and mentors, and as representatives on the Expert Panel  
51  
52 who will have oversight across the lifetime of the research. A working group of partner organisation  
53  
54 representatives, consumer representatives, and experts actively involved in improving mental health  
55  
56  
57  
58  
59  
60



1  
2  
3 care will co-develop training material. People with lived experience of SPMI will also inform  
4  
5 dissemination strategies based on the RCT findings.  
6  
7  
8  
9

## 10 DISCUSSION

11  
12 The *PharMIbridge* RCT will use the medication expertise of community pharmacists to support  
13  
14 medication adherence and address the physical and mental health needs of participants using  
15  
16 psychotropic medication for SPMI. The focus on the physical health of people living with SPMI is  
17  
18 of utmost importance given the considerable life expectancy gap attributable to physical  
19  
20 comorbidities in this population. Beyond improved consumer participant wellbeing, the  
21  
22 *PharMIbridge* RCT is expected to facilitate better relationships between pharmacists and local  
23  
24 health services, including community mental health teams, PHNs and GPs. Lastly, by providing a  
25  
26 diverse range of mental health services and resources and by increasing community outreach to  
27  
28 mental health and non-mental health related services IG pharmacies will become more prominent  
29  
30 in the mental health sector  
31  
32  
33

34  
35 Although the provision of a MedsCheck service for people using high-risk medication such as  
36  
37 psychotropics (in addition to other criteria), is a currently funded service, there is evidence that  
38  
39 pharmacists' mental health literacy concerning SPMI is lower in comparison to other mental  
40  
41 illnesses.<sup>40</sup> Most people using antipsychotics and/or mood stabilisers would be eligible for a  
42  
43 MedsCheck, however, we believe that this vulnerable population may be missing out on this service  
44  
45 as it is not specifically targeted towards mental health consumers. Therefore, the proposed  
46  
47 *PharMIbridge* intervention is a novel service within the community pharmacy setting and is, to our  
48  
49 knowledge, the first RCT to determine the impact of a pharmacist-led support service for people  
50  
51 living with SPMI.  
52  
53  
54

55  
56 All pharmacy staff involved in the RCT will receive B-MHFA. Hence, the *PharMIbridge* RCT  
57  
58 provides an opportunity for all consumer participants to access a recognised standard level of care.  
59  
60

1  
2  
3 Furthermore, analyses conducted on the CG consumer participant outcomes will allow us to identify  
4 the impact of MedsCheck for consumers living with SPMI. This is particularly important given the  
5 current lack of data regarding the impact of MedsChecks on medication adherence. Furthermore, it  
6 is unrealistic and unethical to expect that consumer participants living with SPMI and enrolled into  
7 the CG receive no form of care or service. These participants will be asked to complete a range of  
8 surveys at baseline which are likely to identify adherence and health issues, and consequently  
9 pharmacists would be expected, as health care professionals, to intervene in such situations. Thus,  
10 the research team also anticipates positive outcomes for CG participants, although this effect is  
11 hypothesised to be inferior to IG participants.  
12  
13  
14  
15  
16  
17  
18  
19  
20  
21  
22

23  
24 There are some limitations to this RCT. While a key focus of this research is the physical health  
25 care needs of consumer participants, the follow-up time of six-months is insufficient to use physical  
26 health as a primary outcome measure. The RCT duration was selected to meet the specified time-  
27 frame requirements of the funding body. Hence, the long-term impact of the *PharMIbridge*  
28 intervention cannot be determined. It should be noted that the RCT sites, while specifically chosen  
29 to reflect a variety of geographical regions, types of pharmacies, mental health services and socio-  
30 economic factors, may not be generalisable to the Australian population. Lastly, as adherence is  
31 known to be an inherently difficult concept to measure, to ensure accurate and comprehensive  
32 assessment the research team will use multiple objective and subjective measures to assess this  
33 outcome. Notwithstanding these limitations, the *PharMIbridge* RCT will provide valuable insights  
34 into the future implementation of a community pharmacy-based, mental health support service  
35 across Australia.  
36  
37  
38  
39  
40  
41  
42  
43  
44  
45  
46  
47  
48  
49  
50  
51  
52  
53

### 54 **Ethics and dissemination**

55  
56 This RCT protocol and training program has been approved by Griffith University Human Research  
57 Ethics Committee (2019/473 and 2019/493). The trial has been registered with the Australia and  
58  
59  
60

1  
2  
3 New Zealand Clinical Trials Registry (ANZCTR12620000577910). At the conclusion of the  
4 *PharMIbridge* RCT, a report will be submitted to the Australian Government Department of Health  
5  
6 and partner organisations. A dissemination plan will be developed by the research team, project  
7  
8 partners and the Expert Panel. A summary of findings for all participating pharmacies and consumer  
9  
10 participants will be provided at the end of the RCT. Results will be published as manuscripts in  
11  
12 peer-reviewed journals and presented at national and international scholarly conferences and  
13  
14 symposia.  
15  
16  
17  
18  
19  
20  
21  
22

23 **Acknowledgements** This RCT was developed in partnership with The Pharmacy Guild of  
24  
25 Australia, the Pharmaceutical Society of Australia, Griffith University and The University of  
26  
27 Sydney. We thank Dr Helen Stapleton for her feedback on the manuscript.  
28  
29

30 **Contributors** AW, COR, SM and SE-D designed the research protocol and were named  
31  
32 investigators on the funding proposal. AW and COR are co-principal investigators and led the  
33  
34 intervention and training development and evaluation plan. JB provided expert oversight of the  
35  
36 economic evaluation plan, assisted with the selection of primary outcome measures and datasets.  
37  
38 SM and SE-D led the ethics application process, review of data collection tools and contributed to  
39  
40 the intervention and training development and evaluation plan. RW provided statistical expertise  
41  
42 and sample size calculations for the RCT. All authors were involved in the revision of this protocol  
43  
44 and made a significant contribution towards its intellectual content and approved the final version  
45  
46 of the manuscript.  
47  
48  
49

50  
51 **Funding** This activity received grant funding from the Australian Government.  
52  
53  
54  
55  
56  
57  
58  
59  
60

1  
2  
3 **Competing interests** None declared.  
4

5  
6 **Patient Consent** Not required.  
7

8  
9 **Ethics approval** Griffith University Human Research Ethics Committee (HREC/2019/473 and  
10  
11 HREC/2019/493).  
12

13  
14 **Provenance and peer review** Not commissioned; peer reviewed for ethical and funding approval  
15  
16 prior to submission.  
17

18  
19  
20  
21  
22  
23  
24  
25  
26  
27  
28  
29  
30  
31  
32  
33  
34  
35  
36  
37  
38  
39  
40  
41  
42  
43  
44  
45  
46  
47  
48  
49  
50  
51  
52  
53  
54  
55  
56  
57  
58  
59  
60

For peer review only

## REFERENCES

1. O'Reilly CL, Wong E, Chen TF. A feasibility study of community pharmacists performing depression screening services. *Res Social Adm Pharm* 2015;11(3):364-81.
2. Knox E, Dopheide J, Wincor M, et al. Depression screening in a university campus pharmacy: a pilot project. *J Am Pharm Assoc* 2006;46(4):502-06.
3. Rosser S, Frede S, Conrad WF, et al. Development, implementation, and evaluation of a pharmacist-conducted screening program for depression. *J Am Pharm Assoc* 2013;53(1):22-9.
4. Nishtala PS, McLachlan AJ, Bell JS, et al. Psychotropic prescribing in long-term care facilities: impact of medication reviews and educational interventions. *Am J Geriatr Psychiatry* 2008;16(8):621-32.
5. Schmidt I, Claesson CB, Westerholm B, et al. The impact of regular multidisciplinary team interventions on psychotropic prescribing in Swedish nursing homes. *J Am Geriatr Soc* 1998;46(1):77-82.
6. McMillan SS, Kelly F, Hattingh L, et al. The impact of a person-centred community pharmacy mental health medication support service on consumer outcomes. *J Ment Health* 2018;27(2):164-73.
7. Gisev N, JS. B, O'Reilly CL, et al. An expert panel assessment of comprehensive medication reviews for clients of community mental health teams. *Soc Psychiatry Psychiatr Epidemiol* 2010;45(11):1071-9.
8. Bell JS, Aslani P, McLachlan AJ, et al. Mental health case conferences in primary care: Content and treatment decision making. *Res Soc Adm Pharm* 2007;3(1):86-103.
9. Finley PR, Rens HR, Pont JT, et al. Impact of a collaborative pharmacy practice model on the treatment of depression in primary care. *Am J Health Syst Pharm* 2002;59(16):1518-26.
10. Gable K, Stunson M. Clinical pharmacist interventions on an assertive community treatment team. *Community Ment Health J* 2010;46(4):351-55.

- 1  
2  
3 11. Hansson L, Jormfeldt H, Svedberg P, et al. Mental health professionals' attitudes towards  
4  
5 people with mental illness: do they differ from attitudes held by people with mental illness? *Int*  
6  
7 *J Soc Psychiatry* 2013;59(1):48-54.  
8  
9
- 10 12. Rao H, Mahadevappa H, Pillay P, et al. A study of stigmatized attitudes towards people with  
11  
12 mental health problems among health professionals. *J Psychiatr Ment Health Nurs*  
13  
14 2009;16(3):279-84.  
15  
16
- 17 13. World Health Organisation. Guidelines for the management of physical health conditions in  
18  
19 adults with severe mental disorders. . Geneva: WHO, 2018.  
20  
21
- 22 14. O'Reilly C, Bell S, Kelly P, et al. Exploring the relationship between mental health stigma,  
23  
24 knowledge and provision of pharmacy services for consumers with schizophrenia. *Res Social*  
25  
26 *Adm Pharm* 2015;11(3):e101-e09.  
27  
28
- 29 15. Wheeler A, Mey A, Kelly F, et al. Education and training for community pharmacists in  
30  
31 mental health practice: how to equip this workforce for the future. *J Mental Health Training*  
32  
33 *Educ Pract* 2014;9(3)  
34
- 35 16. Morgan V, Waterreus A, Jablensky A, et al. People living with psychotic illness 2010.  
36  
37 Canberra: Australian Government; National Mental Health Strategy, 2011.  
38  
39
- 40 17. Australian Institute of Health and Welfare. Mental health services - In brief. Canberra,  
41  
42 Australia: Australian Institute of Health and Welfare; 2019.  
43  
44
- 45 18. National Mental Health Commission (NMHC). Equally Well: Improving the physical health  
46  
47 and wellbeing of people living with mental illness in Australia. Sydney, Australia: NMHC,  
48  
49 2016.  
50
- 51 19. Ehrlich C, Chester P, Kisely S, et al. Making sense of self-care practices at the intersection of  
52  
53 severe mental illness and physical health: an Australian study. *Health Soc Care Community*  
54  
55 2018;26(1):e47-e55.  
56  
57  
58  
59  
60

- 1  
2  
3  
4  
5  
6  
7  
8  
9  
10  
11  
12  
13  
14  
15  
16  
17  
18  
19  
20  
21  
22  
23  
24  
25  
26  
27  
28  
29  
30  
31  
32  
33  
34  
35  
36  
37  
38  
39  
40  
41  
42  
43  
44  
45  
46  
47  
48  
49  
50  
51  
52  
53  
54  
55  
56  
57  
58  
59  
60
20. Morant N, Azam K, Johnson S, et al. The least worst option: user experiences of antipsychotic medication and lack of involvement in medication decisions in a UK community sample. *J Ment Health* 2018;27(4):322-28.
21. Young SJ, Praskova A, Hayward N, et al. Attending to physical health in mental health services in Australia: a qualitative study of service users' experiences and expectations. *Health Soc Care Community* 2017;25(2):602-11.
22. Wade M, Tai S, Awenat Y, et al. A systematic review of service-user reasons for adherence and nonadherence to neuroleptic medication in psychosis. *Clin Psychol Rev* 2017;51:75-95.
23. Masand PS, Roca M, Turner MS, et al. Partial adherence to antipsychotic medication impacts the course of illness in patients with schizophrenia: a review. *Prim Care Companion J Clin Psychiatry* 2009;11(4):147-54.
24. Farrelly S, Brown G, Szmukler G, et al. Can the therapeutic relationship predict 18 month outcomes for individuals with psychosis? *Psychiatry Res* 2014;220(1-2):585-91.
25. Bell SJ, Whitehead P, Aslani P, et al. Drug-Related Problems in the Community Setting. *Clin Drug Invest* 2006;26(7):415-25.
26. Nishtala PS, McLachlan AJ, Bell JS, et al. Psychotropic prescribing in long-term care facilities: impact of medication reviews and educational interventions. *Am J Geriatr Psychiatry* 2008;16(8):621-32.
27. Rubio-Valera M, Chen TF, O'Reilly CL. New roles for pharmacists in community mental health care: a narrative review. *Int J Environ Res Public Health* 2014;11
28. Valenstein M, Kavanagh J, Lee T, et al. Using a pharmacy-based intervention to improve antipsychotic adherence among patients with serious mental illness. *Schizophr Bull* 2011;37(4):727-36.

- 1  
2  
3 29. Hartung D, Low A, Jindai K, et al. Interventions to improve pharmacological adherence  
4 among adults with psychotic spectrum disorders and bipolar disorder: a systematic review.  
5  
6 *Psychosomatics* 2017;58(2):101-12.  
7  
8  
9  
10 30. Bouvy ML, Heerdink ER, Urquhart J, et al. Effect of a pharmacist-led intervention on diuretic  
11 compliance in heart failure patients: a randomized controlled study. *J Card Fail*  
12  
13 2003;9(5):404-11.  
14  
15  
16 31. Messerli M, Blozik E, Vriends N, et al. Impact of a community pharmacist-led medication  
17 review on medicines use in patients on polypharmacy: a prospective randomised controlled  
18 trial. *BMC Health Serv Res* 2016;16:145.  
19  
20  
21  
22  
23 32. The Community Pharmacy Medicines Management Project Evaluation Team. The MEDMAN  
24 study: a randomized controlled trial of community pharmacy-led medicines management for  
25 patients with coronary heart disease. *Fam Pract* 2007;24(2):189-200.  
26  
27  
28  
29 33. Bernsten C, Bjorkman I, Caramona M, et al. Improving the well-being of elderly patients via  
30 community pharmacy-based provision of pharmaceutical care: a multicentre study in seven  
31 European countries. *Drugs Aging* 2001;18(1):63-77.  
32  
33  
34 34. Murphy AL, Gardner DM, Jacobs LM. Patient care activities by community pharmacists in a  
35 capitation funding model mental health and addictions program. *BMC Psychiatry*  
36  
37 2018;18(1):192.  
38  
39  
40  
41 35. Haslam L, Gardner DM, Murphy AL. A retrospective analysis of patient care activities in a  
42 community pharmacy mental illness and addictions program. *Res Social Adm Pharm* 2019  
43  
44  
45 36. Australian Bureau of Statistics. ASGC Remoteness and Classification: Purpose and Use.  
46 Canberra: ABS, 2003.  
47  
48  
49 37. Government of Western Australia. Rural Health West: South West – population and health  
50 snapshot. Western Australia: WA Country Health Service, 2015.  
51  
52  
53  
54  
55  
56  
57  
58  
59  
60



- 1  
2  
3 38. New South Wales Government. Capacity Toolkit. State of New South Wales Attorney  
4  
5 General's Department of NSW 2008.  
6  
7  
8 39. Wheeler A, Fowler J, Hattingh L. Using an intervention mapping framework to develop an  
9  
10 online mental health continuing education program for pharmacy staff. *J Contin Educ Health*  
11  
12 *Prof* 2013;33(4):258-66.  
13  
14  
15 40. O'Reilly CL, Bell JS, Chen TF. Pharmacists' beliefs about treatments and outcomes of mental  
16  
17 disorders: A mental health literacy survey. *Aust N Z J Psychiatry* 2010;44(12):1089-96.  
18  
19  
20 41. Knox K, Fejzic J, Mey A, et al. Mental health consumer and caregiver perceptions of stigma  
21  
22 in Australian community pharmacies. *Int J Soc Psychiatry* 2014;60(6):533-43.  
23  
24  
25 42. O'Reilly CL, Bell SJ, Kelly PJ, et al. Impact of mental health first aid training on pharmacy  
26  
27 students' knowledge, attitudes and self-reported behaviour: a controlled trial. *Aust N Z J*  
28  
29 *Psychiatry* 2011;45(7):549-57.  
30  
31  
32 43. El-Den S, Chen TF, Moles RJ, et al. Assessing Mental Health First Aid skills using simulated  
33  
34 patients. *Am J Pharm Educ* 2018;82(2):6222.  
35  
36  
37 44. Boukouvalas E, El-Den S, Chen TF, et al. Confidence and attitudes of pharmacy students  
38  
39 towards mental health crises: patient simulation using people with a lived experience. *Soc*  
40  
41 *Psychiatry Psychiatr Epidemiol* 2018;53(11):1185-95.  
42  
43  
44 45. O'Reilly CL, Bell JS, Chen TF. Consumer-led mental health education for pharmacy students.  
45  
46 *Am J Pharm Educ* 2010;74(9)  
47  
48  
49 46. Fowler JL, McConachie B, Hattingh L, et al. Mentoring pharmacy staff to implement a  
50  
51 medication support service: An evaluation of process and outcomes. *Curr Pharm Teach Learn*  
52  
53 2018;10(7):886-94.  
54  
55  
56 47. Hattingh HL, Knox K, Fejzic J, et al. Privacy and confidentiality: perspectives of mental  
57  
58 health consumers and carers in pharmacy settings. *Int J Pharm Pract* 2015;23(1):52-60.  
59  
60

- 1  
2  
3 48. O'Reilly C, Bell J, Chen T. Mental health consumers and caregivers as instructors for health  
4 professional students: a qualitative study. *Soc Psychiatry Psychiatr Epidemiol* 2011;47(4):607-  
5 13.  
6  
7  
8  
9  
10 49. Mental Health First Aid Australia. Blended MHFA in the Pharmacy. Victoria: MHFA  
11 Australia; 2019.  
12  
13  
14 50. Pharmaceutical Society of Australia, 6th Community Pharmacy Agreement. Guidelines for  
15 pharmacists providing MedsCheck and Diabetes MedsCheck services. Deakin West, ACT:  
16 Pharmaceutical Society of Australia, 2017.  
17  
18  
19 51. O'Reilly Claire L, Moles Rebekah J, Boukouvalas E, et al. Assessing students' mental health  
20 crisis skills via consumers with lived experience: a qualitative evaluation. *J Ment Health Train*  
21 *Educ Pract* 2019;14(5):361-71.  
22  
23  
24  
25  
26  
27  
28 52. Horne R, Weinman J, Hankins M. The beliefs about medicines questionnaire: the development  
29 and evaluation of a new method for assessing the cognitive representation of medication.  
30  
31  
32  
33  
34  
35  
36 53. Nguyen TM, La Caze A, Cottrell N. What are validated self-report adherence scales really  
37 measuring?: a systematic review. *Br J Clin Pharmacol* 2014;77(3):427-45.  
38  
39  
40 54. Sattler EL, Lee JS, Perri M, 3rd. Medication (re)fill adherence measures derived from  
41 pharmacy claims data in older Americans: a review of the literature. *Drugs Aging*  
42 2013;30(6):383-99.  
43  
44  
45  
46 55. Royal Australian and New Zealand College of Psychiatrists. Keeping Body and Mind  
47 Together - Improving the physical health and life expectancy of people with serious mental  
48 illness. . Melbourne, Australia and Wellington, New Zealand: Royal Australian and New  
49 Zealand College of Psychiatrists (RANZCP), 2015.  
50  
51  
52  
53  
54  
55  
56 56. Vancampfort D, Stubbs B, Probst M, et al. Physical activity as a vital sign in patients with  
57 schizophrenia: evidence and clinical recommendations. *Schizophr Res* 2016;170(2-3):336-40.  
58  
59  
60

- 1  
2  
3 57. Australian Bureau of Statistics. National Health Survey 2017-2018 Questionnaire. ABS; 2018.  
4  
5  
6 58. World Health Organization (WHO) ASSIST Working Group. The Alcohol, Smoking and  
7  
8 Substance Involvement Screening Test (ASSIST): development, reliability and feasibility.  
9  
10 *Addiction* 2002;97(9):1183-94.  
11  
12 59. Humeniuk R, Ali R, Babor T, et al. Validation of the Alcohol Smoking and Substance  
13  
14 Involvement Screening Test (ASSIST). *Addiction* 2008;103(6):1039-47.  
15  
16 60. Ashoorian D, Davidson R, Rock D, et al. A clinical communication tool for the assessment of  
17  
18 psychotropic medication side effects. *Psychiatry Res* 2015;230(2):643-57.  
19  
20 61. Rosenbaum S, Ward PB. The Simple Physical Activity Questionnaire. *Lancet Psychiatry*  
21  
22 2016;3(1):e1.  
23  
24 62. SIMPAQ. Simple Physical Activity Questionnaire (SIMPAQ). 2019.  
25  
26 63. Smyth C. The Pittsburgh Sleep Quality Index (PSQI). 2012.  
27  
28 64. Heatherton TF, Kozlowski LT, Frecker RC, et al. The Fagerstrom Test for Nicotine  
29  
30 Dependence: a revision of the Fagerstrom Tolerance Questionnaire. *Br J Addict*  
31  
32 1991;86(9):1119-27.  
33  
34 65. Cleeland CS, Ryan KM. Pain assessment: global use of the Brief Pain Inventory. *Ann Acad*  
35  
36 *Med Singapore* 1994;23(2):129-38.  
37  
38 66. Dworkin RH, Turk DC, Farrar JT, et al. Core outcome measures for chronic pain clinical  
39  
40 trials: IMMPACT recommendations. *Pain* 2005;113(1-2):9-19.  
41  
42 67. Kiresuk TJ, Sherman RE. Goal attainment scaling: A general method for evaluating  
43  
44 comprehensive community mental health programs. *Community Ment Health J*  
45  
46 1968;4(6):443-53.  
47  
48 68. Richardson JR, Peacock SJ, Hawthorne G, et al. Construction of the descriptive system for the  
49  
50 assessment of quality of life AQoL-6D utility instrument. *Health Qual Life Outcomes*  
51  
52 2012;10(1):38.  
53  
54  
55  
56  
57  
58  
59  
60

- 1  
2  
3 69. Bastien CH, Vallieres A, Morin CM. Validation of the Insomnia Severity Index as an outcome  
4  
5 measure for insomnia research. *Sleep Med* 2001;2(4):297-307.  
6  
7  
8 70. Duncan P, Murphy M, Man M-S, et al. Development and validation of the Multimorbidity  
9  
10 Treatment Burden Questionnaire (MTBQ). 2018;8(4):e019413.  
11  
12 71. Hogan TP, Awad AG, Eastwood R. A self-report scale predictive of drug compliance in  
13  
14 schizophrenics: reliability and discriminative validity. *Psychol Med* 1983;13(1):177-83.  
15  
16 72. Nielsen RE, Lindström E, Nielsen J, et al. DAI-10 is as good as DAI-30 in schizophrenia. *Eur*  
17  
18 *Neuropsychopharmacol* 2012;22(10):747-50.  
19  
20 73. Broadbent E, Petrie KJ, Main J, et al. The brief illness perception questionnaire. *J Psychosom*  
21  
22 *Res* 2006;60(6):631-7.  
23  
24 74. Mental Health First Aid Australia. Blended MHFA in the Pharmacy. Victoria: MHFA  
25  
26 Australia; 2018.  
27  
28 75. Jorm AF, Oh E. Desire for social distance from people with mental disorders. *Aust N Z J*  
29  
30 *Psychiatry* 2009;43(3):183-200.  
31  
32 76. Kobau R, Dilirio C, Chapman D, et al. Attitudes towards mental illness and its treatment:  
33  
34 validation of a generic scale for public health surveillance of mental illness associated stigma.  
35  
36 *Comm Mental Health J* 2010;46(2):164-76.  
37  
38 77. Watkins A, Rosenbaum S, Ward PB, et al. The validity and reliability characteristics of the M-  
39  
40 BACK questionnaire to assess the barriers, attitudes, confidence, and knowledge of mental  
41  
42 health staff regarding metabolic health of mental health service users. *Front Public Health*  
43  
44 2017;5:321-21.  
45  
46 78. Phokeo V, Sproule B, Raman-Wilms L. Community pharmacists' attitudes toward and  
47  
48 professional interactions with users of psychiatric medication. *Psychiatr Serv*  
49  
50 2004;55(12):1434-6.  
51  
52  
53  
54  
55  
56  
57  
58  
59  
60

- 1  
2  
3 79. Cates ME, Burton AR, Woolley TW. Attitudes of pharmacists toward mental illness and  
4  
5 providing pharmaceutical care to the mentally ill. *Ann Pharmacother* 2005;39(9):1450-5.  
6  
7  
8 80. Braun V, Clarke V. Using thematic analysis in psychology. *Qual Res Psychol* 2006;3(2):77-  
9  
10 101.  
11  
12 81. Williams M, Peterson GM, Tenni PC, et al. DOCUMENT: a system for classifying drug-  
13  
14 related problems in community pharmacy. *Int J Clin Pharm* 2012;34(1):43-52.  
15  
16  
17 82. Kessler RC, Barker PR, Colpe LJ, et al. Screening for serious mental illness in the general  
18  
19 population. *Arch Gen Psychiatry* 2003;60(2):184-9.  
20  
21  
22  
23  
24  
25

26 **Figure 1:** Overview of the research stages and timing

27  
28 **Figure 2:** Overview of the *PharMIbridge* RCT  
29  
30  
31  
32  
33  
34  
35  
36  
37  
38  
39  
40  
41  
42  
43  
44  
45  
46  
47  
48  
49  
50  
51  
52  
53  
54  
55  
56  
57  
58  
59  
60

**Table 1:** Data collection

| Type of evaluation          | Description/measure                                                                                                                                                                                                                                                                                                                                            | Data source                                                                                                                                                      | Time-point in weeks (RCT) |   |    |
|-----------------------------|----------------------------------------------------------------------------------------------------------------------------------------------------------------------------------------------------------------------------------------------------------------------------------------------------------------------------------------------------------------|------------------------------------------------------------------------------------------------------------------------------------------------------------------|---------------------------|---|----|
|                             |                                                                                                                                                                                                                                                                                                                                                                |                                                                                                                                                                  | Before RCT                | 0 | 26 |
| Formative                   | Training evaluation (paired pre- and post-questionnaires)                                                                                                                                                                                                                                                                                                      | Pharmacists in IG and CG                                                                                                                                         |                           |   |    |
| Adherence                   | MPR and medicine persistence<br>RAM <sup>52</sup> scale                                                                                                                                                                                                                                                                                                        | Pharmacy                                                                                                                                                         |                           |   |    |
|                             |                                                                                                                                                                                                                                                                                                                                                                | PBS data                                                                                                                                                         |                           |   |    |
|                             |                                                                                                                                                                                                                                                                                                                                                                | GuildCare NG <sup>TM</sup> documentation (all consumer participants)                                                                                             |                           |   |    |
| Medication outcomes         | Identification of MRPs and management (MedsCheck or DOCUMENT system <sup>81</sup> )                                                                                                                                                                                                                                                                            | GuildCare NG <sup>TM</sup> documentation (all consumer participants)                                                                                             |                           |   |    |
| Goal achievement            | Type and number of goals set, goal achievement (GAS) <sup>67</sup>                                                                                                                                                                                                                                                                                             | GuildCare NG documentation (IG consumer participants)                                                                                                            |                           |   |    |
| Clinical measurements       | Clinical measures for each consumer participant<br>- Weight / Height (Body Mass Index)<br>- Abdominal girth<br>- Blood pressure                                                                                                                                                                                                                                | GuildCare NG <sup>TM</sup> documentation (all consumer participants)                                                                                             |                           |   |    |
|                             |                                                                                                                                                                                                                                                                                                                                                                | Prescribers / other health workers                                                                                                                               |                           |   |    |
| Health and related outcomes | - PAVS, <sup>56</sup> Dietary Behaviour, <sup>57</sup> ASSIST <sup>58,59</sup> AqoL-6D, <sup>68</sup> ISI, <sup>69</sup> MTBQ, <sup>70</sup> DAI-10, <sup>71,72</sup> BIPQ, <sup>73</sup> K6 <sup>82</sup><br><br>- M3Q <sup>60</sup> SIMPAQ, <sup>61,62</sup> PSQI, <sup>63</sup> Fagerström Test for Nicotine Dependence, <sup>64</sup> BPI <sup>65,66</sup> | - GuildCare NG <sup>TM</sup> documentation (all consumer participants)                                                                                           |                           |   |    |
|                             |                                                                                                                                                                                                                                                                                                                                                                | - IG consumer participants only                                                                                                                                  |                           |   |    |
| Impact                      | - Consumer reported experience measure<br><br>- Semi-structured interviews (service implementation, acceptability)<br><br>- Online survey (service acceptability)                                                                                                                                                                                              | - IG consumer participants only                                                                                                                                  |                           |   |    |
|                             |                                                                                                                                                                                                                                                                                                                                                                | - IG consumer participants (n=20), IG pharmacists (n=24)<br><br>- Other health care professionals (e.g. GP, psychiatrist, MH case manager) and IG pharmacy staff |                           |   |    |
|                             | Health care utilisation                                                                                                                                                                                                                                                                                                                                        | Primary care, MBS, hospitalisation                                                                                                                               |                           |   |    |
| Economic appraisal          | RCT-based economic evaluation (e.g. resources, incentive payments, time)<br><br>Cost-effectiveness (health-care sector perspective)                                                                                                                                                                                                                            | Cost of intervention, MBS, PBS, pharmacy dispensing data                                                                                                         |                           |   |    |
|                             |                                                                                                                                                                                                                                                                                                                                                                | AQoL-6D <sup>68</sup>                                                                                                                                            |                           |   |    |
|                             |                                                                                                                                                                                                                                                                                                                                                                | Cost per additional adherer<br>Cost per additional quality adjusted life year                                                                                    |                           |   |    |

*Hospitalisation, Emergency department admissions, MBS and PBS data will be obtained for 12-months before, and the entire duration of the RCT. Health outcomes data and prescription dispensing data will be obtained for the entire length of the RCT. Abbreviations: ASSIST=Alcohol Smoking and Substance Involvement Screening Test; AqoL-6D=Assessment of Quality of Life; BIPQ = Brief Illness Perception Questionnaire; DAI-10 = Drug Attitude Inventory 10; DOCUMENT=Drug selection, Over/Under dose, Compliance, Untreated indications, Monitoring, Education or information, Non-clinical, Toxicity or adverse reactions; GAS=Goal Attainment Scale; ISI=Insomnia Severity Index; K6=Kessler Psychological Distress Scale; M3Q=My Medicines and Me Questionnaire; MPR=Medicine Possession Ratio; MTBQ=Multimorbidity Treatment Burden Questionnaire; PAVS=Physical Activity Vital Sign Questionnaire; BPI=Brief Pain Inventory; PSQI=Pittsburgh Sleep Quality Index; RAM=Reported Adherence to Medicine Scale; SIMPAQ=Simple Physical Activity Questionnaire.*

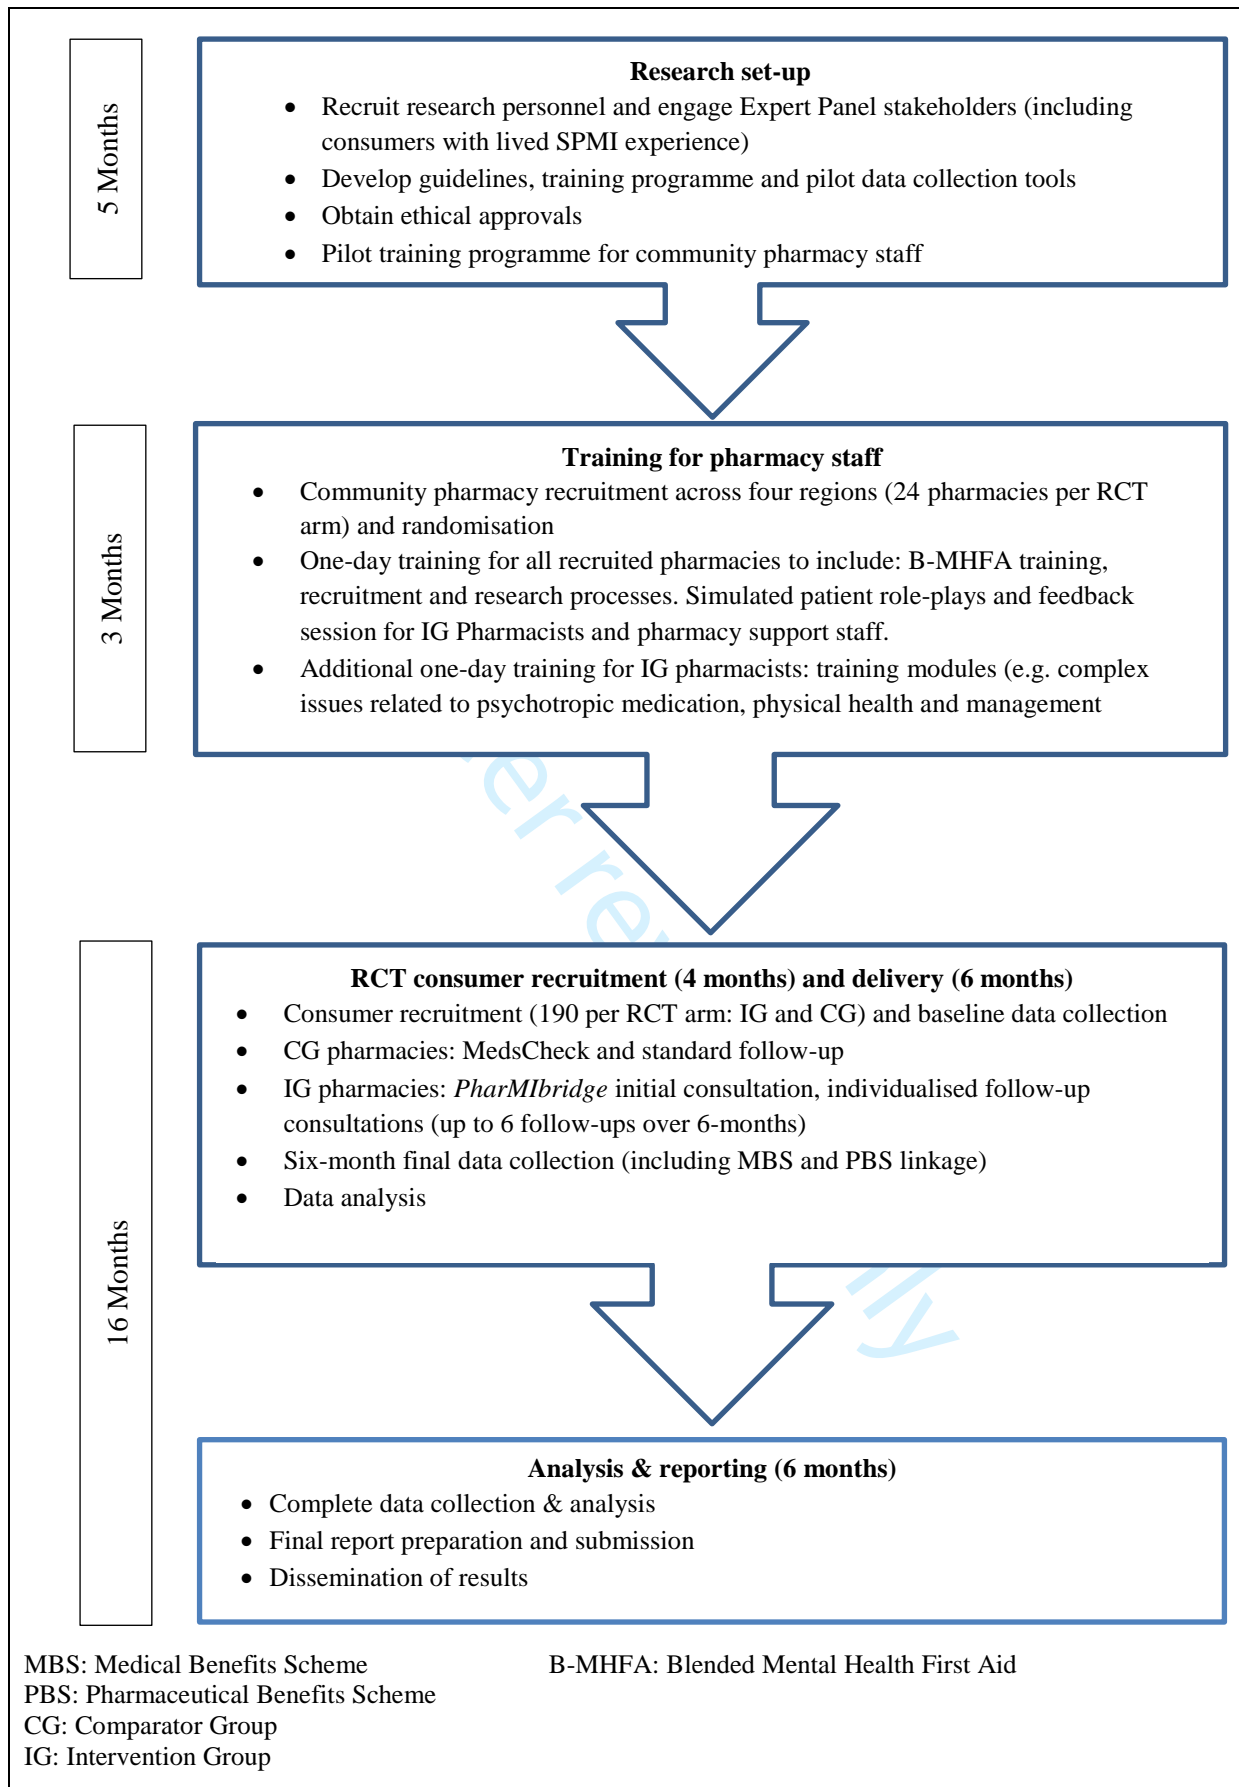

**Figure 1:** Overview of the research stages and timing



**Figure 2:** Overview of the *PharMIbridge* RCT



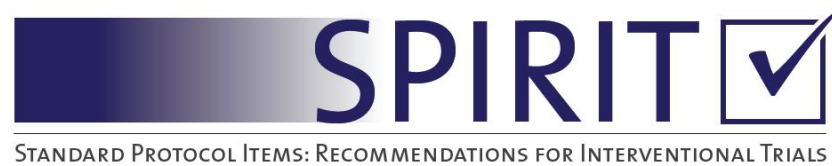

SPIRIT 2013 Checklist: Recommended items to address in a clinical trial protocol and related documents\*

| Section/item                      | Item No | Description                                                                                                                                                                                                                                                                              | Pages in Protocol                                                                                 |
|-----------------------------------|---------|------------------------------------------------------------------------------------------------------------------------------------------------------------------------------------------------------------------------------------------------------------------------------------------|---------------------------------------------------------------------------------------------------|
| <b>Administrative information</b> |         |                                                                                                                                                                                                                                                                                          |                                                                                                   |
| Title                             | 1       | Descriptive title identifying the study design, population, interventions, and, if applicable, trial acronym                                                                                                                                                                             | Pg.1                                                                                              |
| Trial registration                | 2a      | Trial identifier and registry name. If not yet registered, name of intended registry                                                                                                                                                                                                     | Pg.28                                                                                             |
|                                   | 2b      | All items from the World Health Organization Trial Registration Data Set                                                                                                                                                                                                                 | Pg.1, 2, 6, 8-12, 17-22, 28, 29<br>N/A: completion date, summary results.                         |
| Protocol version                  | 3       | Date and version identifier                                                                                                                                                                                                                                                              | N/A                                                                                               |
| Funding                           | 4       | Sources and types of financial, material, and other support                                                                                                                                                                                                                              | Pg.29                                                                                             |
| Roles and responsibilities        | 5a      | Names, affiliations, and roles of protocol contributors                                                                                                                                                                                                                                  | Pg. 1, 29.                                                                                        |
|                                   | 5b      | Name and contact information for the trial sponsor                                                                                                                                                                                                                                       | Pg. 29<br>This information is reported in the Clinical Trial Registration<br>ANZCTR12620000577910 |
|                                   | 5c      | Role of study sponsor and funders, if any, in study design; collection, management, analysis, and interpretation of data; writing of the report; and the decision to submit the report for publication, including whether they will have ultimate authority over any of these activities | Pg.29                                                                                             |
|                                   | 5d      | Composition, roles, and responsibilities of the coordinating centre, steering committee, endpoint adjudication committee, data management team, and other individuals or groups overseeing the trial, if applicable (see Item 21a for data monitoring committee)                         | Pg.8                                                                                              |

1  
2  
3  
4  
5  
6  
7  
8  
9  
10  
11  
12  
13  
14  
15  
16  
17  
18  
19  
20  
21  
22  
23  
24  
25  
26  
27  
28  
29  
30  
31  
32  
33  
34  
35  
36  
37  
38  
39  
40  
41  
42  
43  
44  
45  
46

|                                                           |     |                                                                                                                                                                                                            |                                                                                             |
|-----------------------------------------------------------|-----|------------------------------------------------------------------------------------------------------------------------------------------------------------------------------------------------------------|---------------------------------------------------------------------------------------------|
| <b>Introduction</b>                                       |     |                                                                                                                                                                                                            |                                                                                             |
| Background and rationale                                  | 6a  | Description of research question and justification for undertaking the trial, including summary of relevant studies (published and unpublished) examining benefits and harms for each intervention         | Pg.5-6                                                                                      |
|                                                           | 6b  | Explanation for choice of comparators                                                                                                                                                                      | Pg.6-7.<br>This information is reported in the Clinical Trial Registration.                 |
| Objectives                                                | 7   | Specific objectives or hypotheses                                                                                                                                                                          | Pg.6-7                                                                                      |
| Trial design                                              | 8   | Description of trial design including type of trial (eg, parallel group, crossover, factorial, single group), allocation ratio, and framework (eg, superiority, equivalence, noninferiority, exploratory). | Pg.1, 7, 22.                                                                                |
| <b>Methods: Participants, interventions, and outcomes</b> |     |                                                                                                                                                                                                            |                                                                                             |
| Study setting                                             | 9   | Description of study settings (eg, community clinic, academic hospital) and list of countries where data will be collected. Reference to where list of study sites can be obtained                         | Pg.8-9.                                                                                     |
| Eligibility criteria                                      | 10  | Inclusion and exclusion criteria for participants. If applicable, eligibility criteria for study centres and individuals who will perform the interventions (eg, surgeons, psychotherapists)               | Pg.9-11.                                                                                    |
| Interventions                                             | 11a | Interventions for each group with sufficient detail to allow replication, including how and when they will be administered                                                                                 | Pg.11-16.                                                                                   |
|                                                           | 11b | Criteria for discontinuing or modifying allocated interventions for a given trial participant (e.g. drug dose change in response to harms, participant request, or improving/worsening disease)            | N/A as the intervention will be tailored to each individual participant (see Pg. 11 and 13) |
|                                                           | 11c | Strategies to improve adherence to intervention protocols, and any procedures for monitoring adherence (e.g. drug tablet return, laboratory tests)                                                         | N/A                                                                                         |
|                                                           | 11d | Relevant concomitant care and interventions that are permitted or prohibited during the trial                                                                                                              | N/A                                                                                         |

|                                                                     |     |                                                                                                                                                                                                                                                                                                                                                                                |                                                                                                     |
|---------------------------------------------------------------------|-----|--------------------------------------------------------------------------------------------------------------------------------------------------------------------------------------------------------------------------------------------------------------------------------------------------------------------------------------------------------------------------------|-----------------------------------------------------------------------------------------------------|
| Outcomes                                                            | 12  | Primary, secondary, and other outcomes, including the specific measurement variable (eg, systolic blood pressure), analysis metric (eg, change from baseline, final value, time to event), method of aggregation (eg, median, proportion), and time point for each outcome. Explanation of the clinical relevance of chosen efficacy and harm outcomes is strongly recommended | Pg.17-20,                                                                                           |
| Participant timeline                                                | 13  | Time schedule of enrolment, interventions (including any run-ins and washouts), assessments, and visits for participants. A schematic diagram is highly recommended (see Figure)                                                                                                                                                                                               | Pg.11-13.<br>See Figure 2.<br>This information is also reported in the Clinical Trial Registration. |
| Sample size                                                         | 14  | Estimated number of participants needed to achieve study objectives and how it was determined, including clinical and statistical assumptions supporting any sample size calculations                                                                                                                                                                                          | Pg.21-22.                                                                                           |
| Recruitment                                                         | 15  | Strategies for achieving adequate participant enrolment to reach target sample size                                                                                                                                                                                                                                                                                            | Pg.8, 10, 16.                                                                                       |
| <b>Methods: Assignment of interventions (for controlled trials)</b> |     |                                                                                                                                                                                                                                                                                                                                                                                |                                                                                                     |
| Allocation:                                                         |     |                                                                                                                                                                                                                                                                                                                                                                                |                                                                                                     |
| Sequence generation                                                 | 16a | Method of generating the allocation sequence (eg, computer-generated random numbers), and list of any factors for stratification. To reduce predictability of a random sequence, details of any planned restriction (eg, blocking) should be provided in a separate document that is unavailable to those who enrol participants or assign interventions                       | Pg.9                                                                                                |
| Allocation concealment mechanism                                    | 16b | Mechanism of implementing the allocation sequence (eg, central telephone; sequentially numbered, opaque, sealed envelopes), describing any steps to conceal the sequence until interventions are assigned                                                                                                                                                                      | This information is reported in the Clinical Trial Registration.                                    |
| Implementation                                                      | 16c | Who will generate the allocation sequence, who will enrol participants, and who will assign participants to interventions                                                                                                                                                                                                                                                      | This information is reported in the Clinical Trial Registration.                                    |
| Blinding (masking)                                                  | 17a | Who will be blinded after assignment to interventions (eg, trial participants, care providers, outcome assessors, data analysts), and how                                                                                                                                                                                                                                      | N/A<br>This information is reported in the Clinical Trial Registration.                             |
|                                                                     | 17b | If blinded, circumstances under which unblinding is permissible, and procedure for revealing a participant's allocated intervention during the trial                                                                                                                                                                                                                           | N/A<br>This information is reported in the Clinical Trial Registration.                             |

1  
2  
3  
4  
5  
6  
7  
8  
9  
10  
11  
12  
13  
14  
15  
16  
17  
18  
19  
20  
21  
22  
23  
24  
25  
26  
27  
28  
29  
30  
31  
32  
33  
34  
35  
36  
37  
38  
39  
40  
41  
42  
43  
44  
45  
46

|                                                           |     |                                                                                                                                                                                                                                                                                                                                                                                                              |                                                                                                               |
|-----------------------------------------------------------|-----|--------------------------------------------------------------------------------------------------------------------------------------------------------------------------------------------------------------------------------------------------------------------------------------------------------------------------------------------------------------------------------------------------------------|---------------------------------------------------------------------------------------------------------------|
| <b>Methods: Data collection, management, and analysis</b> |     |                                                                                                                                                                                                                                                                                                                                                                                                              |                                                                                                               |
| Data collection methods                                   | 18a | Plans for assessment and collection of outcome, baseline, and other trial data, including any related processes to promote data quality (eg, duplicate measurements, training of assessors) and a description of study instruments (eg, questionnaires, laboratory tests) along with their reliability and validity, if known. Reference to where data collection forms can be found, if not in the protocol | Pg. 17-21, 39                                                                                                 |
|                                                           | 18b | Plans to promote participant retention and complete follow-up, including list of any outcome data to be collected for participants who discontinue or deviate from intervention protocols                                                                                                                                                                                                                    | Pg.21<br>This information is reported in the Clinical Trial Registration.                                     |
| Data management                                           | 19  | Plans for data entry, coding, security, and storage, including any related processes to promote data quality (eg, double data entry; range checks for data values). Reference to where details of data management procedures can be found, if not in the protocol                                                                                                                                            | Details of the data management processes are outlined in our Ethics application which is approved.            |
| Statistical methods                                       | 20a | Statistical methods for analysing primary and secondary outcomes. Reference to where other details of the statistical analysis plan can be found, if not in the protocol                                                                                                                                                                                                                                     | Pg.22-23.                                                                                                     |
|                                                           | 20b | Methods for any additional analyses (eg, subgroup and adjusted analyses)                                                                                                                                                                                                                                                                                                                                     | Pg.24-25.                                                                                                     |
|                                                           | 20c | Definition of analysis population relating to protocol non-adherence (eg, as randomised analysis), and any statistical methods to handle missing data (eg, multiple imputation)                                                                                                                                                                                                                              | This information is reported in the Clinical Trial Registration.                                              |
| <b>Methods: Monitoring</b>                                |     |                                                                                                                                                                                                                                                                                                                                                                                                              |                                                                                                               |
| Data monitoring                                           | 21a | Composition of data monitoring committee (DMC); summary of its role and reporting structure; statement of whether it is independent from the sponsor and competing interests; and reference to where further details about its charter can be found, if not in the protocol. Alternatively, an explanation of why a DMC is not needed                                                                        | N/A                                                                                                           |
|                                                           | 21b | Description of any interim analyses and stopping guidelines, including who will have access to these interim results and make the final decision to terminate the trial                                                                                                                                                                                                                                      | This information is reported in the Clinical Trial Registration.                                              |
| Harms                                                     | 22  | Plans for collecting, assessing, reporting, and managing solicited and spontaneously reported adverse events and other unintended effects of trial interventions or trial conduct                                                                                                                                                                                                                            | Pg.16-17<br>This information is reported in the Clinical Trial Registration and ethics application (approved) |

|                                 |     |                                                                                                                                                                                                                                                                                     |                                                                                                                                                                              |
|---------------------------------|-----|-------------------------------------------------------------------------------------------------------------------------------------------------------------------------------------------------------------------------------------------------------------------------------------|------------------------------------------------------------------------------------------------------------------------------------------------------------------------------|
| Auditing                        | 23  | Frequency and procedures for auditing trial conduct, if any, and whether the process will be independent from investigators and the sponsor                                                                                                                                         | N/A                                                                                                                                                                          |
| <b>Ethics and dissemination</b> |     |                                                                                                                                                                                                                                                                                     |                                                                                                                                                                              |
| Research ethics approval        | 24  | Plans for seeking research ethics committee/institutional review board (REC/IRB) approval                                                                                                                                                                                           | Pg. 29.                                                                                                                                                                      |
| Protocol amendments             | 25  | Plans for communicating important protocol modifications (eg, changes to eligibility criteria, outcomes, analyses) to relevant parties (eg, investigators, REC/IRBs, trial participants, trial registries, journals, regulators)                                                    | This information is reported in the Clinical Trial Registration.                                                                                                             |
| Consent or assent               | 26a | Who will obtain informed consent or assent from potential trial participants or authorised surrogates, and how (see Item 32)                                                                                                                                                        | Pg. 14<br>This information is reported in the Clinical Trial Registration.                                                                                                   |
|                                 | 26b | Additional consent provisions for collection and use of participant data and biological specimens in ancillary studies, if applicable                                                                                                                                               | Pg. 12, 20.                                                                                                                                                                  |
| Confidentiality                 | 27  | How personal information about potential and enrolled participants will be collected, shared, and maintained in order to protect confidentiality before, during, and after the trial                                                                                                | Details of our data management processes are outlined in the Ethics application (approved) as well as consumer information and consent forms.                                |
| Declaration of interests        | 28  | Financial and other competing interests for principal investigators for the overall trial and each study site                                                                                                                                                                       | Pg.29.                                                                                                                                                                       |
| Access to data                  | 29  | Statement of who will have access to the final trial dataset, and disclosure of contractual agreements that limit such access for investigators                                                                                                                                     | This information is reported in the Clinical Trial Registration.                                                                                                             |
| Ancillary and post-trial care   | 30  | Provisions, if any, for ancillary and post-trial care, and for compensation to those who suffer harm from trial participation                                                                                                                                                       | Details regarding the action/s to take if there is any participant harm are outlined in the Ethics application (approved) as well as consumer information and consent forms. |
| Dissemination policy            | 31a | Plans for investigators and sponsor to communicate trial results to participants, healthcare professionals, the public, and other relevant groups (eg, via publication, reporting in results databases, or other data sharing arrangements), including any publication restrictions | Pg.28.                                                                                                                                                                       |

1  
2  
3  
4  
5  
6  
7  
8  
9  
10  
11  
12  
13  
14  
15  
16  
17  
18  
19  
20  
21  
22  
23  
24  
25  
26  
27  
28  
29  
30  
31  
32  
33  
34  
35  
36  
37  
38  
39  
40  
41  
42  
43  
44  
45  
46

|                            |     |                                                                                                                                                                                                |                                                                                |
|----------------------------|-----|------------------------------------------------------------------------------------------------------------------------------------------------------------------------------------------------|--------------------------------------------------------------------------------|
|                            | 31b | Authorship eligibility guidelines and any intended use of professional writers                                                                                                                 | N/A as ICMJE recommendations will be followed.                                 |
|                            | 31c | Plans, if any, for granting public access to the full protocol, participant-level dataset, and statistical code                                                                                | This information is reported in the Clinical Trial Registration.               |
| <b>Appendices</b>          |     |                                                                                                                                                                                                |                                                                                |
| Informed consent materials | 32  | Model consent form and other related documentation given to participants and authorised surrogates                                                                                             | Informed consent materials were provided in the Ethics application (approved). |
| Biological specimens       | 33  | Plans for collection, laboratory evaluation, and storage of biological specimens for genetic or molecular analysis in the current trial and for future use in ancillary studies, if applicable | N/A                                                                            |

\*It is strongly recommended that this checklist be read in conjunction with the SPIRIT 2013 Explanation & Elaboration for important clarification on the items. Amendments to the protocol should be tracked and dated. The SPIRIT checklist is copyrighted by the SPIRIT Group under the Creative Commons "[Attribution-NonCommercial-NoDerivs 3.0 Unported](https://creativecommons.org/licenses/by-nc-nd/3.0/)" license.

For peer review only
