# Supplementary material for: Bridging the gap between physical and mental illness in community pharmacy (PharMIbridge): protocol for an Australian cluster randomised controlled trial
Source: PubMed Central journal article supplement — BMJ Open. 2020 Jul 23;10(7):e039983. doi: 10.1136/bmjopen-2020-039983 (PMC7380878; doi:10.1136/bmjopen-2020-039983), 2020-07-23
Supplement: bmjopen-2020-039983.reviewer_comments.pdf [file bmjopen-2020-039983.reviewer_comments.pdf]

## PEER REVIEW HISTORY

BMJ Open publishes all reviews undertaken for accepted manuscripts. Reviewers are asked to complete a checklist review form (<http://bmjopen.bmj.com/site/about/resources/checklist.pdf>) and are provided with free text boxes to elaborate on their assessment. These free text comments are reproduced below.

## ARTICLE DETAILS

|                            |                                                                                                                                                           |
|----------------------------|-----------------------------------------------------------------------------------------------------------------------------------------------------------|
| <b>TITLE (PROVISIONAL)</b> | Bridging the gap between physical and mental illness in community pharmacy (PharMIbridge): protocol for an Australian cluster randomised controlled trial |
| <b>AUTHORS</b>             | Wheeler, Amanda; O'Reilly, Claire L.; El-Den, Sarira; Byrnes, Joshua; Ware, Robert; McMillan, Sara                                                        |

This article was not externally reviewed at BMJ Open. Protocols that have been independently assessed prior to submission to BMJ Open are usually fast-tracked to publication on the grounds that further substantial changes will not be possible. This independent assessment will usually be external, independent review for both a substantial grant award from a non-commercial or government funder and ethics approval.
